# Supplementary material for: Pan-cancer analysis of non-oncogene addiction to DNA repair
Source: Research Square preprint supplement (doi:10.21203/rs.3.rs-846744/v1), 2021-09-03
Supplement: Supplementary file 2 [file 0cd9db11fad710ab206a0e1c.xlsx]

## Sheet: Supp Table 5
Cluster	Pathway	Genes	Cancer group
			A				B1				B2						D
			READ	COAD	THCA	GBM	STAD	ESCA	BLCA	HNSC	CHOL	LIHC	UCEC	BRCA	LUAD	LUSC	KIRC	KIRP	PRAD	KICH
1	OTHER	CHEK1	High-Worse (HR: 8.1)				ns				High-Worse (HR: 1.4)						High-Worse (HR: 1.9)
	BER/NER/MMR/HR/TS	PCNA	High-Worse (HR: 5.2)				ns				ns						High-Worse (HR: 1.7)
	NER/MMR/HR	RPA3	High-Worse (HR: 4.3)				High-Worse (HR: 1.2)				ns						High-Worse (HR: 1.7
	BER/NER	POLE	High-Worse (HR: 3.4)				High-Better (HR: 0.85)				ns						ns
	BER/NER	POLE2	High-Worse (HR: 4.5)				ns				ns						ns
	OTHER	DUT	High-Worse (HR: 1.8)				ns				ns						High-Better (HR: 0.6)
	OTHER	PRPF19	High-Worse (HR: 1.7)				ns				High-Better (HR:0.66)						High-Better (HR: 0.40)
	NER/MMR/HR	RPA1	High-Worse (HR: 1.6)				ns				High-Better (HR: 0.83)						High-Better (HR: 0.75)
	OTHER	CHAF1A	High-Worse (HR: 3.9)				High-Better (HR: 0.78)				ns						High-Better (HR: 0.45)
	NER	CDK7	High-Better (HR: 0.4))				ns				High-Better (HR: 0.73)						ns
	NER	DDB1	High-Better (HR: 0.6)				ns				High-Better (HR: 0.68)						High-Better (HR: 0.43)
	NER	XAB2	High-Better (HR: 0.4)				ns				High-Better (HR: 0.78)						High-Better (HR: 0.47)
	NHEJ	XRCC6	High-Better (HR: 0.71)				ns				ns						High-Better (HR: 0.65)
	BER/NER/MMR/HR	RFC2	High-Worse (HR: 9.1)				ns				ns						High-Worse (HR: 2.0)
	OTHER	CDC5L	High-Worse (HR: 1.3)				ns				High-Better (HR: 0.71)						ns
	OTHER	WEE1	High-Worse (HR: 1.4)				ns				High-Better (HR: 0.78)						ns
	BER/NER/MMR/HR	RFC3	High-Worse (HR: 4.7)				ns				High-Better (HR: 0.81)						ns
2	OTHER	TOPBP1	High-Worse (HR: 3.3)				ns				High-Better (HR: 0.86)						High-Worse (HR: 1.4)
	OTHER	ATRIP	High-Worse (HR: 1.5)				ns				High-Better (HR: 0.48)						High-Better (HR: 0.28)
	NER	ERCC2	High-Worse (HR: 1.8)				High-Worse (HR: 1.2)				ns						High-Better (HR: 0.71)
	FA/HR	TOP3A	High-Worse (HR: 4.0)				ns				High-Better (HR: 0.81)						ns
	BER/NER/MMR/HR	POLD2	High-Worse (HR: 8.8)				ns				High-Worse (HR: 1.2)						High-Better (HR: 0.61)
	BER/NER/MMR/HR	POLD3	High-Worse (HR: 2.3)				ns				High-Better (HR: 0.85)						High-Worse (HR: 1.70)
	HR	RAD51D	High-Worse (HR: 4.2)				ns				ns						High-Worse (HR: 1.6)
	BER/NER/MMR/HR	RFC5	High-Worse (HR: 2.3)				ns				ns						High-Worse (HR: 1.6)
	HR	PPP4C	High-Worse (HR: 2.5)				ns				ns						ns
	FA/HR	RMI1	High-Worse (HR: 2.8)				ns				High-Better (HR: 0.85)						High-Better (HR: 0.44)
	OTHER	RNMT	High-Better (HR: 0.63)				ns				High-Better (HR: 0.66)						ns
	NER	GTF2H4	High-Better (HR: 0.6)				ns				ns						High-Worse (HR: 1.5)
	NER	MNAT1	ns				High-Worse (HR: 1.2)				ns						High-Better (HR: 0.39)
	BER/NHEJ	PNKP	High-Better (HR: 0.49)				ns				ns						High-Better (HR: 0.48)
	BER/NER/MMR/HR	POLD1	ns				High-Better (HR: 0.83)				High-Worse (HR: 1.4)						High-Worse (HR: 2.0)
	NHEJ	XRCC5	High-Better (HR: 0.63)				ns				High-Better (HR: 0.73)						High-Better (HR: 0.79)
	NER	CCNH	ns				High-Worse (HR: 1.2)				High-Better (HR: 0.62)						High-Better (HR: 0.74)
	NER	GTF2H1	High-Worse (HR: 2.5)				ns				ns						ns
	HR	NSMCE3	High-Worse (HR: 1.4)				ns				High-Better (HR: 0.79)						High-Better (HR: 0.63)
	HR	KAT5	High-Better (HR: 0.62)				ns				High-Better (HR: 0.78)						High-Better (HR: 0.38)
	OTHER	PLRG1	High-Better (HR: 0.38)				ns				ns						High-Better (HR: 0.73)
3	BER	LIG3	ns				ns				High-Better (HR: 0.75)						High-Better (HR: 0.42)
	OTHER	CLK2	ns				ns				ns						High-Worse (HR: 1.5)
	NER	ERCC3	High-Worse (HR:2.7)				ns				ns						ns
	NER	GTF2H2	High-Worse (HR: 2.0)				ns				ns						ns
	NER	GTF2H3	High-Worse (HR: 2.9)				ns				ns						ns
	HR	H2AFX	High-Worse (HR: 5.4)				ns				High-Worse (HR: 1.4)						ns
	BER	XRCC1	High-Better (HR: 0.48)				ns				High-Better (HR: 0.64)						ns
	OTHER	SPRTN	High-Worse (HR: 4.4)				ns				High-Better (HR:0.76)						ns
	HR	NFATC2IP	High-Worse (HR: 3.0)				ns				High-Better (HR: 0.69)						High-Worse (HR: 1.7)
	HR	MUS81	High-Worse (HR: 2.2)				ns				ns						High-Worse (HR: 1.4)
	FA/HR	BRIP1	High-Worse (HR: 5.5)				ns				ns						High-Worse (HR: 2.1)
	HR/TS	POLQ	High-Worse (HR: 6.3)				ns				ns						High-Worse (HR: 2.4)
	HR	RTEL1	High-Worse (HR: 1.9)				ns				ns						High-Worse (HR: 1.5)
	FA	UBE2T	High-Worse (HR: 12)				ns				ns						High-Worse (HR: 1.8)
	BER	SMUG1	High-Worse (HR: 2.0)				ns				ns						High-Better (HR: 0.81)
	NER/FA	ERCC4	High-Worse (HR: 3.1)				ns				High-Better (HR: 0.74)						High-Better (HR: 0.67)
	OTHER	HERC2	ns				ns				High-Better (HR: 0.79)						High-Better (HR: 0.48)
	BER/NER/MMR/HR	RFC1	ns				ns				High-Better (HR: 0.77)						High-Better (HR: 0.79)
	TS	REV3L	ns				ns				High-Better (HR: 0.67)						ns
	NHEJ	NHEJ1	High-Worse (HR: 2.4)				ns				ns						High-Worse (HR: 1.8)
	BER/NER/MMR/HR	RFC4	High-Worse (HR: 8.4)				ns				High-Worse (HR: 1.3)						High-Worse (HR: 1.4)
	ns	not significant
	High-Better	Genes whose higher expression is associated with better survival
	High-Worse	Genes whose higher expression is associated with worse survival
