# Supplementary material for: Pan-cancer analysis of non-oncogene addiction to DNA repair
Source: Research Square preprint supplement (doi:10.21203/rs.3.rs-846744/v1), 2021-09-03
Supplement: Supplementary file 5 [file 6ce60cc7465ddace734d919a.xlsx]

## Sheet: Supp Table 1
EntrezID	Gene	Pathway	q1_efficacy	q1_selectivity	q1_isEssential
64782	AEN	OTHER	-0.198	0.075	FALSE
8846	ALKBH1	BER	-0.405	-0.045	FALSE
121642	ALKBH2	DR	-0.116	-0.024	FALSE
221120	ALKBH3	DR	-0.331	-0.09	FALSE
328	APEX1	BER	-0.286	0.007	FALSE
27301	APEX2	BER	-0.82	0.274	TRUE
200558	APLF	BER	-0.216	-0.017	FALSE
54840	APTX	BER	-0.281	-0.011	FALSE
10973	ASCC3	DR	-0.458	0.139	TRUE
472	ATM	OTHER	-0.292	0.869	FALSE
545	ATR	OTHER	-1.383	0.128	TRUE
84126	ATRIP	OTHER	-0.816	-0.097	TRUE
546	ATRX	OTHER	-0.543	0.225	TRUE
580	BARD1	FA/HR	-0.92	0.081	TRUE
580	BARD1	FA/HR	-0.92	0.081	TRUE
10286	BCAS2	OTHER	-0.986	0.144	TRUE
641	BLM	FA/HR	-0.403	0.006	FALSE
672	BRCA1	FA/HR	-0.935	0.115	TRUE
675	BRCA2	FA/HR	-0.862	0.04	TRUE
79184	BRCC3	OTHER	-0.214	0.071	FALSE
83990	BRIP1	FA/HR	-0.602	-0.065	TRUE
902	CCNH	NER	-0.989	-0.198	TRUE
993	CDC25A	OTHER	-0.563	0.003	TRUE
994	CDC25B	OTHER	-0.836	0.375	TRUE
995	CDC25C	OTHER	-0.413	0.002	TRUE
988	CDC5L	OTHER	-1.725	-0.214	TRUE
1022	CDK7	NER	-1.518	-0.277	TRUE
1069	CETN2	NER	-0.215	-0.022	FALSE
10036	CHAF1A	OTHER	-1.593	-0.026	TRUE
1111	CHEK1	OTHER	-1.666	-0.002	TRUE
11200	CHEK2	OTHER	-0.049	1.18	FALSE
1196	CLK2	OTHER	-0.566	-0.119	TRUE
8452	CUL3	NER	-0.925	0.557	TRUE
8451	CUL4A	NER	-0.377	0.112	FALSE
8065	CUL5	NER	-0.212	0.582	FALSE
9937	DCLRE1A	OTHER	-0.173	0.08	FALSE
64858	DCLRE1B	OTHER	-1.075	0.18	TRUE
64421	DCLRE1C	NHEJ	-0.326	-0.088	FALSE
1642	DDB1	NER	-1.78	-0.292	TRUE
1643	DDB2	NER	-0.395	-0.01	FALSE
11144	DMC1	HR	-0.323	-0.075	FALSE
1791	DNTT	NHEJ	-0.206	-0.116	FALSE
1854	DUT	OTHER	-1.576	-0.103	TRUE
146956	EME1	HR	-0.359	0.044	FALSE
197342	EME2	HR	-0.293	-0.064	FALSE
284131	ENDOV	OTHER	-0.339	-0.01	FALSE
2067	ERCC1	NER/FA/HR	-0.44	-0.02	TRUE
2068	ERCC2	NER	-1.152	-0.057	TRUE
2071	ERCC3	NER	-0.618	-0.178	TRUE
2072	ERCC4	NER/FA	-0.558	-0.035	TRUE
2073	ERCC5	NER	-0.331	-0.158	FALSE
2074	ERCC6	NER	-0.234	-0.119	FALSE
1161	ERCC8	NER	-0.316	0.197	FALSE
9156	EXO1	HR/MMR	-0.478	0.25	TRUE
91442	FAAP24	FA	-0.496	-0.063	TRUE
22909	FAN1	FA	-0.265	-0.046	FALSE
2175	FANCA	FA	-0.553	0.166	TRUE
2187	FANCB	FA	-0.156	0.259	FALSE
2176	FANCC	FA	-0.427	-0.042	TRUE
2177	FANCD2	FA	-0.468	-0.08	TRUE
2178	FANCE	FA	-0.396	0.057	FALSE
2188	FANCF	FA	-0.718	0.103	TRUE
2189	FANCG	FA	-0.489	0.085	TRUE
55215	FANCI	FA	-0.582	0.126	TRUE
55120	FANCL	FA	-0.542	0.133	TRUE
57697	FANCM	FA/HR	-0.818	0.296	TRUE
2237	FEN1	BER/HR	-1.081	0.196	TRUE
1647	GADD45A	OTHER	-0.218	0.034	FALSE
10912	GADD45G	OTHER	-0.311	-0.024	FALSE
348654	GEN1	HR	-0.286	-0.038	FALSE
2965	GTF2H1	NER	-0.883	-0.018	TRUE
2966	GTF2H2	NER	-0.626	-0.165	TRUE
2967	GTF2H3	NER	-0.632	-0.227	TRUE
2968	GTF2H4	NER	-1.007	-0.172	TRUE
404672	GTF2H5	NER	-0.471	0.235	TRUE
3014	H2AFX	HR	-0.677	-0.01	TRUE
113510	HELQ	FA/HR	-0.248	-0.111	FALSE
8924	HERC2	OTHER	-0.605	-0.004	TRUE
3280	HES1	FA	-0.461	0.195	TRUE
164045	HFM1	HR	-0.287	0.009	FALSE
6596	HLTF	TS	-0.187	0.091	FALSE
3146	HMGB1	BER/MMR	-0.736	0.127	TRUE
3148	HMGB2	BER	-0.118	0.1	FALSE
3364	HUS1	OTHER	-0.921	0.255	TRUE
3417	IDH1	OTHER	-0.396	-0.009	FALSE
54617	INO80	HR	-1.004	0.162	TRUE
10524	KAT5	HR	-0.902	-0.079	TRUE
3978	LIG1	BER/NER/MMR/HR	-0.795	0.118	TRUE
3980	LIG3	BER	-0.534	-0.065	TRUE
3981	LIG4	NHEJ	-0.378	-0.163	FALSE
10459	MAD2L2	FA	-1.299	0.021	TRUE
8930	MBD4	BER	-0.385	-0.178	FALSE
9656	MDC1	OTHER	-0.546	0.068	TRUE
4255	MGMT	DR	-0.171	-0.011	FALSE
4292	MLH1	MMR	-0.376	-0.074	FALSE
27030	MLH3	MMR	-0.168	-0.192	FALSE
64210	MMS19	NER	-1.156	0.04	TRUE
4331	MNAT1	NER	-1.053	-0.09	TRUE
10933	MORF4L1	OTHER	-0.415	0.255	TRUE
4350	MPG	BER	-0.338	0.062	FALSE
136647	MPLKIP	BER/OTHER	-0.338	-0.044	FALSE
64976	MRPL40	BER/OTHER	-0.921	0.213	TRUE
4436	MSH2	MMR	-0.428	-0.09	TRUE
4437	MSH3	MMR	-0.214	-0.031	FALSE
2956	MSH6	MMR	-0.243	0.141	FALSE
80198	MUS81	HR	-0.555	-0.08	TRUE
4595	MUTYH	BER	-0.275	-0.081	FALSE
79035	NABP2	OTHER	-0.521	0.252	TRUE
4683	NBN	HR/NHEJ	-0.404	0.038	FALSE
79661	NEIL1	BER	-0.272	0.088	FALSE
252969	NEIL2	BER	-0.118	-0.006	FALSE
55247	NEIL3	BER	-0.102	0.05	FALSE
84901	NFATC2IP	HR	-0.588	-0.079	TRUE
79840	NHEJ1	NHEJ	-0.51	-0.021	TRUE
197370	NSMCE1	HR	-1.108	0.079	TRUE
56160	NSMCE3	HR	-1.14	-0.033	TRUE
54780	NSMCE4A	HR	-0.675	0.077	TRUE
4913	NTHL1	BER	-0.35	-0.017	FALSE
4521	NUDT1	NP	-0.258	0.007	FALSE
55270	NUDT15	NP	-0.279	-0.131	FALSE
4968	OGG1	BER	-0.385	-0.008	FALSE
79728	PALB2	FA/HR	-0.719	0.104	TRUE
142	PARP1	BER/HR/NHEJ	-0.338	-0.138	FALSE
10038	PARP2	BER/HR	-0.203	-0.111	FALSE
10039	PARP3	BER/NHEJ	-0.318	-0.107	FALSE
143	PARP4	BER	-0.231	0.155	FALSE
22976	PAXIP1	HR	-0.749	0.765	TRUE
5111	PCNA	BER/NER/MMR/HR/TS	-2.047	-0.038	TRUE
5187	PER1	OTHER	-0.042	0.094	FALSE
1263	PLK3	OTHER	-0.231	0.043	FALSE
5356	PLRG1	OTHER	-1.401	-0.095	TRUE
5378	PMS1	MMR	-0.168	0.077	FALSE
5395	PMS2	MMR	-0.309	-0.096	FALSE
11284	PNKP	BER/NHEJ	-0.858	-0.12	TRUE
5422	POLA1	OTHER	-1.67	0.127	TRUE
5423	POLB	BER/NHEJ/TS	-0.105	-0.044	FALSE
5424	POLD1	BER/NER/MMR/HR	-1.338	-0.15	TRUE
5425	POLD2	BER/NER/MMR/HR	-0.99	-0.11	TRUE
10714	POLD3	BER/NER/MMR/HR	-1.331	-0.184	TRUE
57804	POLD4	BER/NER/MMR/HR	-0.304	0.145	FALSE
5426	POLE	BER/NER	-1.712	-0.103	TRUE
5427	POLE2	BER/NER	-1.664	-0.134	TRUE
54107	POLE3	BER/NER	-0.79	0.344	TRUE
56655	POLE4	BER/NER	-0.596	0.28	TRUE
5428	POLG	OTHER	-0.864	0.195	TRUE
5429	POLH	HR	-0.368	-0.07	FALSE
11201	POLI	TS	-0.093	0.18	FALSE
51426	POLK	BER/TS	-0.216	-0.18	FALSE
27343	POLL	BER/NHEJ/TS	-0.37	-0.093	FALSE
27434	POLM	NHEJ	-0.385	0.101	FALSE
353497	POLN	TS	-0.198	0.013	FALSE
10721	POLQ	HR/TS	-0.668	-0.02	TRUE
5531	PPP4C	HR	-1.241	-0.024	TRUE
9989	PPP4R1	HR	-0.343	0.153	FALSE
151987	PPP4R2	HR	-0.857	0.076	TRUE
27339	PRPF19	OTHER	-2.247	-0.127	TRUE
5728	PTEN	OTHER	-0.237	2.688	FALSE
5810	RAD1	OTHER	-0.656	0.023	TRUE
5884	RAD17	OTHER	-1.154	0.035	TRUE
56852	RAD18	TS	-0.278	0.098	FALSE
5886	RAD23A	NER	-0.308	-0.013	FALSE
5887	RAD23B	NER	-0.56	0.094	TRUE
10111	RAD50	HR/NHEJ	-0.387	-0.047	FALSE
5888	RAD51	FA/HR	-1.51	0.163	TRUE
5890	RAD51B	HR	-0.446	0.069	TRUE
5889	RAD51C	FA/HR	-0.874	0.026	TRUE
5892	RAD51D	HR	-1.018	-0.016	TRUE
5893	RAD52	HR	-0.309	-0.088	FALSE
25788	RAD54B	HR	-0.161	-0.155	FALSE
8438	RAD54L	HR	-0.443	-0.103	TRUE
5883	RAD9A	OTHER	-1.235	0.163	TRUE
144715	RAD9B	OTHER	-0.316	-0.05	FALSE
5932	RBBP8	HR	-1.069	0.047	TRUE
9978	RBX1	NER	-1.587	0.258	TRUE
201299	RDM1	HR	-0.433	-0.103	TRUE
5965	RECQL	HR	-0.061	-0.04	FALSE
9400	RECQL5	HR	-0.273	0.044	FALSE
51455	REV1	TS	-0.268	-0.06	FALSE
5980	REV3L	TS	-0.735	-0.175	TRUE
5981	RFC1	BER/NER/MMR/HR	-0.864	-0.018	TRUE
5982	RFC2	BER/NER/MMR/HR	-1.469	-0.218	TRUE
5983	RFC3	BER/NER/MMR/HR	-1.486	-0.217	TRUE
5984	RFC4	BER/NER/MMR/HR	-1.189	-0.022	TRUE
5985	RFC5	BER/NER/MMR/HR	-1.237	-0.198	TRUE
55183	RIF1	NHEH/OTHER	-0.629	0.105	TRUE
80010	RMI1	FA/HR	-0.843	-0.021	TRUE
116028	RMI2	FA/HR	-0.513	0.102	TRUE
165918	RNF168	NHEJ	-0.921	0.285	TRUE
6047	RNF4	OTHER	-0.868	0.09	TRUE
9025	RNF8	NHEJ	-0.879	0.203	TRUE
8731	RNMT	OTHER	-1.048	-0.132	TRUE
6117	RPA1	NER/MMR/HR	-1.957	-0.095	TRUE
6118	RPA2	NER/MMR/HR	-2.047	0.178	TRUE
6119	RPA3	NER/MMR/HR	-1.538	-0.054	TRUE
29935	RPA4	NER/MMR/HR	-0.263	-0.149	FALSE
6240	RRM1	NP	-2.014	-0.105	TRUE
6241	RRM2	NP	-2.041	0.028	TRUE
50484	RRM2B	OTHER	-0.291	0.006	FALSE
51750	RTEL1	HR	-0.658	-0.029	TRUE
6419	SETMAR	OTHER	-0.156	-0.113	FALSE
257218	SHPRH	TS	-0.254	0.043	FALSE
84464	SLX4	FA/HR	-0.476	-0.164	TRUE
6597	SMARCA4	OTHER	-1.171	0.808	TRUE
56916	SMARCAD1	HR	-0.216	0.12	FALSE
6599	SMARCC1	OTHER	-0.749	0.164	TRUE
23137	SMC5	HR	-1.059	0.177	TRUE
23583	SMUG1	BER	-0.596	-0.113	TRUE
6659	SOX4	OTHER	-0.451	0.324	TRUE
23626	SPO11	HR	-0.292	0.259	FALSE
83932	SPRTN	OTHER	-0.836	-0.005	TRUE
126074	SWSAP1	HR	-0.36	-0.152	FALSE
6917	TCEA1	NER	-0.371	0.211	FALSE
6996	TDG	BER	-0.392	0.007	FALSE
55775	TDP1	BER	-0.376	0.138	FALSE
51567	TDP2	OTHER	-0.661	0.196	TRUE
9894	TELO2	FA	-1	0.081	TRUE
7156	TOP3A	FA/HR	-1.03	-0.251	TRUE
11073	TOPBP1	OTHER	-1.148	-0.042	TRUE
7157	TP53	OTHER	-0.649	3.727	TRUE
7158	TP53BP1	HR/NHEJ	-0.549	1.113	TRUE
11277	TREX1	OTHER	-0.248	-0.06	FALSE
11219	TREX2	OTHER	-0.275	-0.093	FALSE
7272	TTK	OTHER	-1.193	0.078	TRUE
7298	TYMS	OTHER	-1.504	0.766	TRUE
7319	UBE2A	TS	-0.604	0.329	TRUE
7334	UBE2N	TS	-1.265	0.311	TRUE
29089	UBE2T	FA	-0.527	-0.019	TRUE
7336	UBE2V2	TS	-0.349	-0.111	FALSE
51720	UIMC1	HR	-0.384	-0.041	FALSE
7374	UNG	BER	-0.309	0.006	FALSE
7398	USP1	FA/TS	-0.632	0.171	TRUE
57654	UVSSA	NER	-0.317	-0.134	FALSE
57599	WDR48	FA/TS	-0.995	0.49	TRUE
7465	WEE1	OTHER	-1.875	-0.065	TRUE
7486	WRN	BER/HR	-1.161	0.672	TRUE
56949	XAB2	NER	-1.879	-0.219	TRUE
7507	XPA	NER	-0.365	-0.133	FALSE
7515	XRCC1	BER	-0.655	-0.085	TRUE
7516	XRCC2	FA/HR	-0.775	0.195	TRUE
7517	XRCC3	HR	-0.889	0.042	TRUE
7518	XRCC4	NHEJ	-0.435	-0.029	TRUE
7520	XRCC5	NHEJ	-1.243	-0.032	TRUE
2547	XRCC6	NHEJ	-1.72	-0.204	TRUE
7529	YWHAB	OTHER	-0.255	0.21	FALSE
7531	YWHAE	OTHER	-0.534	0.336	TRUE
