# Supplementary material for: Pan-cancer analysis of non-oncogene addiction to DNA repair
Source: Research Square preprint supplement (doi:10.21203/rs.3.rs-846744/v1), 2021-09-03
Supplement: Supplementary file 8 [file 071b63ce2ba29869c49c8766.xlsx]

## Sheet: Supp Table 4
Gene	Efficacy	Selectivity	Dep_score	log2_FC
ATRIP	-0.816	-0.097	Intermediate	Upregulated
BRIP1	-0.602	-0.065	Low	Highly upregulated
CCNH	-0.989	-0.198	Intermediate	Downregulated
CDC5L	-1.725	-0.214	High	Downregulated
CDK7	-1.518	-0.277	High	Upregulated
CHAF1A	-1.593	-0.026	High	Upregulated
CHEK1	-1.666	-0.002	High	Highly upregulated
CLK2	-0.566	-0.119	Low	Upregulated
DDB1	-1.78	-0.292	High	Upregulated
DUT	-1.576	-0.103	High	Upregulated
ERCC2	-1.152	-0.057	Intermediate	Upregulated
ERCC3	-0.618	-0.178	Low	Upregulated
ERCC4	-0.558	-0.035	Low	Downregulated
GTF2H1	-0.883	-0.018	Intermediate	Downregulated
GTF2H2	-0.626	-0.165	Low	Upregulated
GTF2H3	-0.632	-0.227	Low	Upregulated
GTF2H4	-1.007	-0.172	Intermediate	Upregulated
H2AFX	-0.677	-0.01	Low	Upregulated
HERC2	-0.605	-0.004	Low	Downregulated
KAT5	-0.902	-0.079	Intermediate	Downregulated
LIG3	-0.534	-0.065	Low	Upregulated
MNAT1	-1.053	-0.09	Intermediate	Upregulated
MUS81	-0.555	-0.08	Low	Upregulated
NFATC2IP	-0.588	-0.079	Low	Upregulated
NHEJ1	-0.51	-0.021	Low	Downregulated
NSMCE3	-1.14	-0.033	Intermediate	Downregulated
PCNA	-2.047	-0.038	High	Upregulated
PLRG1	-1.401	-0.095	Intermediate	Downregulated
PNKP	-0.858	-0.12	Intermediate	Upregulated
POLD1	-1.338	-0.15	Intermediate	Upregulated
POLD2	-0.99	-0.11	Intermediate	Upregulated
POLD3	-1.331	-0.184	Intermediate	Upregulated
POLE	-1.712	-0.103	High	Upregulated
POLE2	-1.664	-0.134	High	Highly upregulated
POLQ	-0.668	-0.02	Low	Highly upregulated
PPP4C	-1.241	-0.024	Intermediate	Upregulated
PRPF19	-2.247	-0.127	High	Upregulated
RAD51D	-1.018	-0.016	Intermediate	Upregulated
REV3L	-0.735	-0.175	Low	Downregulated
RFC1	-0.864	-0.018	Low	Downregulated
RFC2	-1.469	-0.218	High	Upregulated
RFC3	-1.486	-0.217	High	Upregulated
RFC4	-1.189	-0.022	Intermediate	Highly upregulated
RFC5	-1.237	-0.198	Intermediate	Upregulated
RMI1	-0.843	-0.021	Intermediate	Upregulated
RNMT	-1.048	-0.132	Intermediate	Upregulated
RPA1	-1.957	-0.095	High	Upregulated
RPA3	-1.538	-0.054	High	Upregulated
RTEL1	-0.658	-0.029	Low	Upregulated
SMUG1	-0.596	-0.113	Low	Upregulated
SPRTN	-0.836	-0.005	Low	Upregulated
TOP3A	-1.03	-0.251	Intermediate	Upregulated
TOPBP1	-1.148	-0.042	Intermediate	Upregulated
UBE2T	-0.527	-0.019	Low	Highly upregulated
WEE1	-1.875	-0.065	High	Downregulated
XAB2	-1.879	-0.219	High	Upregulated
XRCC1	-0.655	-0.085	Low	Upregulated
XRCC5	-1.243	-0.032	Intermediate	Upregulated
XRCC6	-1.72	-0.204	High	Upregulated
