# Supplementary material for: Pan-cancer analysis of non-oncogene addiction to DNA repair
Source: Research Square preprint supplement (doi:10.21203/rs.3.rs-846744/v1), 2021-09-03
Supplement: Supplementary file 9 [file 154be84c8d3af270991c25b3.xlsx]

## Sheet: Supp Table 3
Cancer	Gene	FC	log2_FC	M_TPM_Tumor	M_TPM_Normal	p_value	p_value_adj
PRAD	POLD1	1.25	0.32	328.71	263.31	6.61e-05	0.000149
READ	POLD1	2.52	1.33	1161.63	461.45	2.11e-05	0.000116
STAD	POLD1	2.11	1.08	748	353.94	3.3e-10	3.92e-09
THCA	POLD1	1.37	0.46	592.56	431.72	2.03e-11	7.22e-11
UCEC	POLD1	2.61	1.38	1314.51	504.05	2.7e-17	3.54e-16
BLCA	POLD1	2.66	1.41	1042.94	392.63	2.98e-10	1.36e-08
BRCA	POLD1	2.07	1.05	542.27	261.36	1.72e-29	8.44e-29
CHOL	POLD1	1.89	0.92	608.6	321.67	1.9e-05	7.61e-05
COAD	POLD1	1.98	0.99	1097.71	554.36	3.21e-16	1.64e-15
ESCA	POLD1	2.85	1.51	819.24	287.43	2.52e-07	2.57e-05
GBM	POLD1	2.53	1.34	506.69	200.65	0.00253	0.00688
HNSC	POLD1	1.97	0.98	1104.2	559.76	8.59e-16	1.76e-14
KICH	POLD1	1.58	0.66	453.04	286.42	1.23e-06	3.41e-06
KIRC	POLD1	1.67	0.74	324.11	194.58	8.5e-24	3.78e-23
KIRP	POLD1	1.96	0.97	560.99	285.91	4.21e-16	7.62e-15
LIHC	POLD1	2.52	1.33	663.63	263.66	1.28e-21	3.07e-20
LUAD	POLD1	1.52	0.6	699.64	460.24	6.71e-12	1.98e-11
LUSC	POLD1	2.14	1.1	958.57	447.63	1.59e-21	7.47e-21
PRAD	POLQ	2.35	1.23	24.79	10.54	2.05e-08	7.88e-08
READ	POLQ	2.62	1.39	248.58	94.75	9.81e-05	0.000402
STAD	POLQ	4.05	2.02	341.11	84.31	2.12e-14	9.08e-13
THCA	POLQ	-1.14	-0.19	12.51	14.23	5.49e-06	1.11e-05
UCEC	POLQ	10.1	3.34	209.88	20.79	9.38e-21	4.53e-19
BLCA	POLQ	5.32	2.41	290.3	54.57	3.41e-10	1.49e-08
BRCA	POLQ	6.73	2.75	167.87	24.92	4.03e-52	9.89e-51
ESCA	POLQ	5.26	2.4	574.59	109.15	9.17e-07	4.24e-05
GBM	POLQ	16.22	4.02	78.11	4.82	0.000154	0.00178
HNSC	POLQ	2.82	1.5	324.25	115	5.22e-16	1.12e-14
KICH	POLQ	6.73	2.75	30.66	4.55	2.42e-08	9.75e-08
KIRC	POLQ	4.66	2.22	34.63	7.42	1.54e-32	1.76e-31
KIRP	POLQ	7.07	2.82	29.58	4.18	1.37e-15	2.1e-14
LIHC	POLQ	9.49	3.25	73.85	7.78	5.33e-23	1.76e-21
LUAD	POLQ	10.99	3.46	123.38	11.23	3.74e-31	1.15e-29
CHOL	POLQ	17.03	4.09	103.54	6.08	4.29e-08	4.82e-07
COAD	POLQ	2.54	1.34	234.23	92.36	8.32e-17	4.58e-16
LUSC	POLQ	27.01	4.76	394.2	14.6	1.62e-31	1.3e-29
PRAD	SMUG1	1.34	0.42	675.63	504.72	1.16e-07	3.95e-07
THCA	SMUG1	1.19	0.26	500.36	418.81	2.87e-06	5.97e-06
UCEC	SMUG1	1.72	0.78	808.44	470.58	3e-13	1.72e-12
BLCA	SMUG1	2.15	1.1	870.01	405.39	1.24e-09	3.69e-08
BRCA	SMUG1	1.47	0.56	647.95	439.54	6.19e-21	1.99e-20
CHOL	SMUG1	-1.17	-0.23	649.96	762.1	0.0134	0.0245
HNSC	SMUG1	1.33	0.41	649.95	488.72	3.87e-07	1.43e-06
KICH	SMUG1	2.02	1.01	939.99	466.39	1e-11	1.71e-10
KIRC	SMUG1	1.23	0.3	538.66	436.4	0.0185	0.0228
KIRP	SMUG1	1.49	0.58	698.34	468.28	4.57e-08	1.45e-07
LUAD	SMUG1	2.08	1.05	700.78	337.66	4.1e-25	4.26e-24
LUSC	SMUG1	2.2	1.14	729.43	331.11	9.2e-28	1.03e-26
PRAD	RFC5	-1.06	-0.09	235.35	250.34	0.000431	0.000858
READ	RFC5	1.34	0.42	456.98	340.74	0.0109	0.0215
STAD	RFC5	1.57	0.66	436.38	277.08	1.16e-08	9.39e-08
THCA	RFC5	1.43	0.52	333.56	232.73	1.91e-13	8.43e-13
UCEC	RFC5	1.38	0.47	403.09	291.99	0.000149	0.000276
BLCA	RFC5	2.2	1.13	509.87	232.24	3.27e-09	7.43e-08
BRCA	RFC5	1.51	0.59	420.74	279.4	5.3e-22	1.79e-21
COAD	RFC5	1.68	0.75	507.88	302.9	4.72e-15	2.09e-14
ESCA	RFC5	2.26	1.18	484.49	214.24	3.79e-06	9.22e-05
GBM	RFC5	2.43	1.28	465.95	191.42	0.000196	0.00178
HNSC	RFC5	1.89	0.92	535.14	282.56	2.52e-13	2.89e-12
KICH	RFC5	-1.31	-0.39	194.08	254.09	2.1e-06	5.56e-06
KIRP	RFC5	1.55	0.63	354.66	229.27	7.23e-11	3.66e-10
LIHC	RFC5	1.41	0.5	339.41	240.41	9.25e-05	0.000186
LUAD	RFC5	1.98	0.98	360.04	181.95	2.95e-21	2e-20
LUSC	RFC5	3.5	1.81	634.41	181.43	8.05e-31	2.76e-29
READ	GTF2H4	1.38	0.46	413.48	300.66	0.00135	0.00358
THCA	GTF2H4	1.52	0.6	548.74	361.88	5.52e-24	1.23e-22
UCEC	GTF2H4	1.6	0.68	659.55	411.74	6.38e-15	4.99e-14
BLCA	GTF2H4	1.7	0.76	602.43	355.37	3.46e-09	7.78e-08
BRCA	GTF2H4	1.36	0.44	459.87	338.91	8.03e-17	2.12e-16
CHOL	GTF2H4	-1.29	-0.36	489.89	630.58	0.00472	0.00973
COAD	GTF2H4	1.29	0.37	411.49	318.69	1.73e-11	5.23e-11
ESCA	GTF2H4	1.53	0.62	392.15	255.56	0.000263	0.0018
HNSC	GTF2H4	1.45	0.53	539.85	373.13	1.55e-10	1.06e-09
KICH	GTF2H4	-1.83	-0.87	207.7	379.97	1.49e-10	1.27e-09
KIRC	GTF2H4	1.14	0.19	379.62	333.84	2.31e-05	3.46e-05
KIRP	GTF2H4	1.4	0.49	556.17	395.85	1.46e-10	7e-10
LIHC	GTF2H4	1.28	0.36	627.87	489.13	3.09e-05	6.64e-05
LUAD	GTF2H4	1.65	0.72	502.26	304.92	6.27e-23	5.06e-22
LUSC	GTF2H4	1.78	0.83	582.12	327.67	1.21e-24	7.97e-24
PRAD	UBE2T	1.62	0.69	84.09	52.04	1.11e-07	3.81e-07
READ	UBE2T	2.06	1.04	550.59	267.14	0.000254	0.000873
STAD	UBE2T	3.12	1.64	477.51	153.08	6.75e-14	2.39e-12
THCA	UBE2T	1.63	0.71	64.68	39.65	9.48e-17	6.26e-16
UCEC	UBE2T	7.91	2.98	542.31	68.53	2.96e-21	2.11e-19
BLCA	UBE2T	3.52	1.82	486.91	138.32	3.46e-09	7.78e-08
BRCA	UBE2T	10.06	3.33	493.29	49.03	3e-63	1.14e-60
CHOL	UBE2T	16.77	4.07	224.74	13.4	9.03e-09	1.32e-07
COAD	UBE2T	2.9	1.54	567.8	195.71	4.93e-21	5.93e-20
ESCA	UBE2T	7.67	2.94	462.63	60.33	4.65e-08	2.51e-05
GBM	UBE2T	3.18	1.67	436.14	137.33	0.00339	0.0086
HNSC	UBE2T	2.73	1.45	419.07	153.78	1.76e-19	9.38e-18
KICH	UBE2T	1.74	0.8	60.93	35.06	0.00907	0.0136
KIRC	UBE2T	1.92	0.94	65.81	34.22	4.25e-15	1.08e-14
KIRP	UBE2T	3.52	1.82	94.81	26.94	4.28e-16	7.73e-15
LIHC	UBE2T	11.2	3.49	242.75	21.66	8.92e-28	2.82e-25
LUAD	UBE2T	11.42	3.51	399.27	34.96	1.52e-34	2.43e-32
LUSC	UBE2T	14.82	3.89	606.06	40.89	8.6e-32	1.3e-29
PRAD	H2AFX	1.6	0.67	730.21	457.73	8.11e-10	3.99e-09
READ	H2AFX	2.28	1.19	2005.94	878.61	0.000502	0.00154
STAD	H2AFX	1.6	0.68	2032.96	1270.77	0.00028	0.000812
THCA	H2AFX	1.69	0.76	708.98	418.62	8.58e-13	3.52e-12
UCEC	H2AFX	3.87	1.95	2662.84	687.72	8.15e-20	2.41e-18
BLCA	H2AFX	2.87	1.52	2060.92	718.96	7.04e-09	1.33e-07
BRCA	H2AFX	3.76	1.91	896.46	238.33	5.51e-54	1.7e-52
CHOL	H2AFX	3.2	1.68	807.29	252.36	6.52e-06	3.02e-05
COAD	H2AFX	2.01	1	1796.85	896.13	3.51e-14	1.41e-13
ESCA	H2AFX	2.85	1.51	1876.48	659.36	5.92e-06	0.000124
GBM	H2AFX	2.21	1.14	2064.77	933.87	0.00201	0.00575
HNSC	H2AFX	1.65	0.72	1545.79	937.44	3.57e-06	1.12e-05
KICH	H2AFX	1.79	0.84	661.61	369.82	8.24e-06	1.97e-05
KIRC	H2AFX	1.67	0.74	402.6	241.32	4.38e-10	8.54e-10
KIRP	H2AFX	1.73	0.79	525.2	303.94	1.81e-06	4.54e-06
LIHC	H2AFX	2.74	1.45	814.45	297.28	9.9e-17	9.65e-16
LUAD	H2AFX	2.5	1.32	1004.74	401.92	2.28e-24	2.17e-23
LUSC	H2AFX	3.98	1.99	1533.84	385.37	1.05e-29	1.96e-28
PRAD	CLK2	1.18	0.24	703.26	595.71	0.000697	0.00134
READ	CLK2	1.82	0.87	615.44	337.35	1.18e-05	7.47e-05
STAD	CLK2	1.37	0.46	699.92	509.47	1.83e-06	8.82e-06
THCA	CLK2	1.16	0.21	787.15	679.81	3.43e-05	6.35e-05
UCEC	CLK2	1.34	0.43	1220.33	908.84	3.05e-05	6.15e-05
BLCA	CLK2	1.87	0.9	1116.49	597.67	7.2e-09	1.35e-07
BRCA	CLK2	1.44	0.53	893.37	619.56	2.65e-20	8.24e-20
CHOL	CLK2	1.88	0.91	1134.52	604.72	0.000439	0.00119
COAD	CLK2	1.46	0.54	610.52	418.91	8.06e-11	2.29e-10
ESCA	CLK2	1.36	0.44	708.55	521.42	0.00442	0.0155
HNSC	CLK2	1.25	0.32	558.18	445.93	0.00021	0.000484
KICH	CLK2	-1.49	-0.57	295.6	440	2.94e-09	1.53e-08
KIRC	CLK2	1.83	0.87	669.23	365.42	1.25e-21	4.76e-21
KIRP	CLK2	1.68	0.75	689.62	409.78	6.05e-09	2.2e-08
LIHC	CLK2	1.93	0.94	772.1	401.07	4.13e-22	1.1e-20
LUAD	CLK2	1.97	0.98	904.72	459.63	4.1e-25	4.26e-24
LUSC	CLK2	1.77	0.82	907.85	513.74	6.56e-21	2.9e-20
PRAD	RFC2	1.19	0.25	489.68	411.37	2.57e-05	6.18e-05
READ	RFC2	1.78	0.83	783.98	440.93	8.29e-06	5.79e-05
STAD	RFC2	1.41	0.49	593.88	422.56	3.68e-05	0.000131
THCA	RFC2	1.21	0.28	428.69	353.13	4.62e-14	2.18e-13
UCEC	RFC2	2.24	1.17	902.11	401.9	2.07e-20	8.16e-19
BLCA	RFC2	2.05	1.04	976.47	475.33	8.72e-09	1.57e-07
BRCA	RFC2	2.05	1.03	811.62	396.4	1.21e-51	2.8e-50
COAD	RFC2	1.68	0.75	789.81	470.17	8.17e-17	4.51e-16
ESCA	RFC2	1.81	0.85	737.83	408.62	0.00106	0.00508
GBM	RFC2	3.16	1.66	1173.39	371.46	0.00016	0.00178
HNSC	RFC2	1.52	0.6	953.21	628.64	1.29e-10	8.99e-10
KICH	RFC2	1.26	0.34	409.26	324.05	0.0114	0.0168
KIRC	RFC2	2.17	1.12	604.12	277.77	8.4e-39	6.51e-37
KIRP	RFC2	2.15	1.11	604.27	280.81	2.91e-18	1.52e-16
LIHC	RFC2	1.41	0.49	762.4	542.31	8.92e-06	2.06e-05
LUAD	RFC2	1.79	0.84	710.75	397.34	2.8e-18	1.42e-17
LUSC	RFC2	2.54	1.35	1062.56	418.27	3.54e-29	5.58e-28
PRAD	RFC4	1.34	0.42	188.42	140.38	1.81e-08	7.03e-08
READ	RFC4	1.93	0.95	472.11	244.63	1.29e-05	7.96e-05
STAD	RFC4	2.17	1.11	397.4	183.54	6.53e-15	3.41e-13
THCA	RFC4	1.09	0.12	154.07	141.98	3.12e-06	6.46e-06
UCEC	RFC4	2.36	1.24	542.79	229.62	1.32e-12	6.84e-12
BLCA	RFC4	2.62	1.39	619.43	236.77	1.18e-08	1.96e-07
BRCA	RFC4	2.36	1.24	472.47	200.41	1.31e-45	1.75e-44
CHOL	RFC4	3	1.59	428.66	142.73	2.26e-09	4.67e-08
COAD	RFC4	2.31	1.21	485.56	210.03	4.13e-21	5.08e-20
ESCA	RFC4	4.16	2.06	544.53	130.88	9.41e-08	2.51e-05
GBM	RFC4	3.17	1.67	473.27	149.07	0.000188	0.00178
HNSC	RFC4	3.46	1.79	741.07	214.17	2.92e-24	2.72e-21
KIRC	RFC4	1.92	0.94	214.51	111.92	2.71e-34	4.38e-33
KIRP	RFC4	2.12	1.09	228.14	107.39	1.48e-17	4.97e-16
LIHC	RFC4	3.36	1.75	420.6	125.26	2.84e-25	2.04e-23
LUAD	RFC4	3.58	1.84	380.46	106.25	1.72e-31	5.77e-30
LUSC	RFC4	10.33	3.37	1210.62	117.21	8.33e-32	1.3e-29
READ	POLE2	1.86	0.9	139.96	75.18	0.0018	0.00456
STAD	POLE2	2.66	1.41	145.41	54.73	3.22e-12	6.58e-11
THCA	POLE2	2.02	1.02	25.69	12.7	3.51e-13	1.5e-12
UCEC	POLE2	3.67	1.87	98.18	26.77	7.44e-16	7.11e-15
BLCA	POLE2	3.75	1.91	122.41	32.64	1.33e-08	2.14e-07
BRCA	POLE2	3.71	1.89	107.07	28.85	6.81e-51	1.45e-49
COAD	POLE2	2.36	1.24	152.66	64.72	4.25e-14	1.69e-13
ESCA	POLE2	4.31	2.11	171.82	39.83	4.77e-07	3.06e-05
GBM	POLE2	20.28	4.34	85.95	4.24	0.000167	0.00178
HNSC	POLE2	2.1	1.07	165.02	78.48	9.23e-12	8.01e-11
KICH	POLE2	2.67	1.42	21.97	8.22	1.23e-06	3.41e-06
KIRC	POLE2	2.79	1.48	23.88	8.55	1.53e-24	7.2e-24
KIRP	POLE2	4.41	2.14	22.35	5.07	2.05e-15	2.98e-14
LIHC	POLE2	4.38	2.13	96.53	22.05	4.81e-17	4.91e-16
LUAD	POLE2	8.89	3.15	96.9	10.9	1.04e-30	2.85e-29
LUSC	POLE2	9.43	3.24	159.17	16.88	2.24e-31	1.32e-29
PRAD	RPA3	1.21	0.27	232.05	192.09	0.00138	0.00254
STAD	RPA3	1.23	0.3	421.99	342.47	0.00394	0.00871
THCA	RPA3	-1.12	-0.17	313.64	352.57	0.00809	0.0115
UCEC	RPA3	1.72	0.79	365.61	212.04	5.15e-09	1.63e-08
BLCA	RPA3	2.13	1.09	527.35	247.91	1.86e-08	2.74e-07
BRCA	RPA3	1.82	0.86	400.07	220.18	2.05e-40	1.91e-39
CHOL	RPA3	-1.42	-0.51	298.42	424.45	0.000967	0.00239
COAD	RPA3	1.61	0.69	502.13	312.12	1.57e-10	4.33e-10
ESCA	RPA3	2.63	1.4	428.91	162.95	2.05e-07	2.53e-05
GBM	RPA3	2.74	1.45	467.43	170.79	0.000289	0.00181
HNSC	RPA3	1.85	0.89	457.15	246.74	3.08e-13	3.47e-12
KIRP	RPA3	1.52	0.61	477.01	313.48	6.07e-07	1.62e-06
LUAD	RPA3	1.76	0.81	441.48	251.22	7.6e-14	2.65e-13
LUSC	RPA3	2.09	1.07	483.73	231.08	2.54e-20	1.06e-19
READ	CHEK1	1.95	0.96	441.13	226.26	6.94e-05	0.000304
STAD	CHEK1	2.54	1.34	367.44	144.7	2.15e-15	1.38e-13
THCA	CHEK1	1.22	0.29	112.6	92.27	3.05e-07	7.02e-07
UCEC	CHEK1	3.27	1.71	304.33	93.05	1.9e-18	3.41e-17
BLCA	CHEK1	2.77	1.47	338.95	122.36	2.47e-08	3.42e-07
BRCA	CHEK1	2.76	1.46	258.08	93.49	6.88e-40	6.16e-39
CHOL	CHEK1	4.24	2.09	220.89	52.05	4.51e-09	7.62e-08
COAD	CHEK1	2.26	1.17	453.11	200.77	3.68e-20	3.61e-19
ESCA	CHEK1	4.35	2.12	369.37	85	9.41e-08	2.51e-05
GBM	CHEK1	4.27	2.09	289.69	67.81	0.000312	0.00184
HNSC	CHEK1	2.21	1.15	365.44	165.03	1.43e-18	5.73e-17
KICH	CHEK1	1.63	0.7	178.56	109.64	4.39e-06	1.1e-05
KIRC	CHEK1	1.46	0.54	155.57	106.76	1.05e-10	2.12e-10
KIRP	CHEK1	1.45	0.53	141.22	97.57	2.52e-05	5.39e-05
LIHC	CHEK1	2.93	1.55	155.6	53.15	2.47e-17	2.66e-16
LUAD	CHEK1	4.58	2.19	242.94	53.07	2.71e-30	6.72e-29
LUSC	CHEK1	7.18	2.84	406.4	56.6	9.08e-32	1.3e-29
READ	PCNA	1.89	0.92	3943.8	2087.24	0.00101	0.00279
STAD	PCNA	2.21	1.15	3352.18	1514.3	1.19e-11	2.12e-10
THCA	PCNA	1.33	0.41	1380.03	1036.88	2.87e-14	1.38e-13
UCEC	PCNA	2.7	1.43	2614.61	968.94	1.21e-18	2.34e-17
BLCA	PCNA	2.49	1.32	3747.74	1503.34	2.67e-08	3.64e-07
BRCA	PCNA	2.59	1.38	2676.22	1031.34	8.53e-56	3.3e-54
CHOL	PCNA	1.68	0.74	1590.89	949.28	0.000115	0.000362
COAD	PCNA	2.15	1.1	4140.19	1925.18	9.73e-17	5.3e-16
ESCA	PCNA	3.51	1.81	3095.71	881.74	2.31e-07	2.57e-05
GBM	PCNA	5.25	2.39	2970.21	566.2	0.00016	0.00178
HNSC	PCNA	1.87	0.9	3456.1	1846.65	7.79e-13	8.19e-12
KIRC	PCNA	1.16	0.21	1253.19	1083.23	0.000963	0.00131
KIRP	PCNA	1.47	0.56	1334.69	907.44	2.59e-09	1e-08
LIHC	PCNA	2.06	1.04	1969.16	955.84	5.61e-18	6.72e-17
LUAD	PCNA	2.17	1.12	2020.49	928.96	6.27e-23	5.06e-22
LUSC	PCNA	3.69	1.88	3577.67	970.68	1.03e-30	3.24e-29
PRAD	CHAF1A	1.3	0.37	534.47	412.22	4.57e-06	1.23e-05
READ	CHAF1A	1.74	0.8	749.94	431.31	0.000698	0.00204
STAD	CHAF1A	1.92	0.94	591.07	308.25	4.56e-11	6.77e-10
THCA	CHAF1A	1.32	0.4	260.03	197.03	4.27e-11	1.47e-10
UCEC	CHAF1A	3.33	1.73	744.46	223.77	1.1e-20	5.05e-19
BLCA	CHAF1A	2.12	1.08	977.89	461.44	3.21e-08	4.23e-07
BRCA	CHAF1A	2.12	1.08	538.43	254.54	4.14e-38	3.32e-37
CHOL	CHAF1A	3.34	1.74	536.13	160.3	2.26e-09	4.67e-08
COAD	CHAF1A	1.81	0.86	780.67	431.52	3.45e-14	1.38e-13
ESCA	CHAF1A	2.59	1.37	689.8	266.62	6.17e-07	3.56e-05
GBM	CHAF1A	1.9	0.93	517.6	272.53	0.0158	0.0304
HNSC	CHAF1A	1.9	0.93	936.88	492.67	3.35e-13	3.76e-12
KICH	CHAF1A	2.78	1.47	344.05	123.78	2.23e-12	6.56e-11
KIRC	CHAF1A	1.81	0.86	233.96	129.13	1.52e-28	1.02e-27
KIRP	CHAF1A	1.53	0.61	235.19	153.8	2.44e-08	8.1e-08
LIHC	CHAF1A	2.8	1.49	478.54	170.93	7.21e-23	2.27e-21
LUAD	CHAF1A	2.06	1.04	388.42	188.27	6.29e-19	3.41e-18
LUSC	CHAF1A	4.46	2.16	850.65	190.57	1.7e-29	2.94e-28
PRAD	POLE	1.24	0.31	805.92	651.58	7.38e-07	2.23e-06
STAD	POLE	1.78	0.83	1371.88	769.57	1.38e-10	1.8e-09
THCA	POLE	1.24	0.31	372.39	300.37	2.25e-08	5.8e-08
UCEC	POLE	2.17	1.12	1312.94	604.67	2.1e-15	1.81e-14
BLCA	POLE	1.96	0.97	1324.46	674.1	5.27e-08	6.37e-07
BRCA	POLE	1.61	0.69	1096.44	681.31	1.33e-28	6.21e-28
COAD	POLE	1.37	0.46	1324.78	965.73	5.94e-06	1.09e-05
ESCA	POLE	1.48	0.56	1749.25	1183.42	0.00251	0.00994
GBM	POLE	2.36	1.24	572.63	242.57	0.00262	0.00707
HNSC	POLE	1.62	0.7	1180.57	728.33	1.02e-10	7.24e-10
KICH	POLE	1.43	0.52	420.27	293.25	0.00139	0.00236
KIRC	POLE	1.53	0.62	483.5	315.13	4.16e-17	1.19e-16
KIRP	POLE	1.75	0.81	617.14	352.88	2.93e-11	1.6e-10
LUAD	POLE	2.02	1.01	872.22	432.62	4.73e-18	2.36e-17
LUSC	POLE	2.63	1.4	1247.95	474.42	6.83e-25	4.63e-24
READ	BRIP1	1.98	0.98	128.36	64.91	0.000539	0.00164
STAD	BRIP1	3.03	1.6	165.22	54.5	3.38e-12	6.85e-11
THCA	BRIP1	1.93	0.95	14.49	7.5	3.03e-12	1.17e-11
UCEC	BRIP1	5.08	2.35	81.47	16.03	1.1e-15	1.01e-14
BLCA	BRIP1	3.88	1.95	132.99	34.3	6.73e-08	7.77e-07
BRCA	BRIP1	4.57	2.19	165.33	36.21	2.19e-34	1.39e-33
COAD	BRIP1	2.12	1.08	135.96	64.28	3.49e-13	1.24e-12
ESCA	BRIP1	5.21	2.38	255.19	48.96	3.47e-07	2.72e-05
GBM	BRIP1	11.81	3.56	85.3	7.22	0.000278	0.0018
HNSC	BRIP1	1.98	0.99	183.06	92.36	5.21e-07	1.89e-06
KICH	BRIP1	2.71	1.44	12.38	4.57	0.00715	0.0109
KIRC	BRIP1	3.51	1.81	39.95	11.37	1.13e-28	7.64e-28
KIRP	BRIP1	3.77	1.92	25.66	6.8	1.17e-06	3e-06
LIHC	BRIP1	2.68	1.42	63.14	23.57	1.54e-05	3.44e-05
LUAD	BRIP1	7.59	2.92	96.11	12.66	1.92e-30	4.89e-29
LUSC	BRIP1	12.31	3.62	205.32	16.68	3.48e-31	1.62e-29
READ	TOPBP1	1.42	0.5	1031.24	727.07	0.00165	0.00424
STAD	TOPBP1	2.04	1.03	1284.75	628.29	2.91e-15	1.79e-13
UCEC	TOPBP1	1.48	0.57	749.99	506.9	3.69e-05	7.35e-05
BLCA	TOPBP1	1.89	0.92	1062.23	563	7.17e-08	8.16e-07
BRCA	TOPBP1	1.37	0.45	1163.14	851.33	3.49e-11	7.06e-11
CHOL	TOPBP1	1.76	0.82	759.28	431.11	5.17e-06	2.48e-05
COAD	TOPBP1	1.51	0.6	998.35	659.06	4.55e-14	1.8e-13
ESCA	TOPBP1	2.25	1.17	1982.17	881.74	1.73e-06	5.84e-05
HNSC	TOPBP1	1.87	0.9	1399.84	748.56	2.21e-13	2.57e-12
KICH	TOPBP1	1.78	0.84	639.46	358.41	7.17e-07	2.08e-06
KIRC	TOPBP1	1.44	0.53	616.7	427.17	2.36e-19	7.75e-19
KIRP	TOPBP1	1.45	0.54	527.57	362.75	1.65e-08	5.62e-08
LIHC	TOPBP1	1.73	0.79	591.42	340.93	5.29e-13	3.04e-12
LUAD	TOPBP1	1.7	0.77	889.83	522.8	3.62e-15	1.42e-14
LUSC	TOPBP1	3.12	1.64	1751.08	560.47	5.88e-30	1.23e-28
PRAD	PNKP	1.63	0.71	980.12	600.01	5.18e-14	5.43e-13
READ	PNKP	1.66	0.74	673.14	404.38	0.000526	0.00161
THCA	PNKP	1.51	0.59	817.2	541.99	9.91e-21	1.18e-19
UCEC	PNKP	1.89	0.92	1037.85	549.89	1.93e-13	1.15e-12
BLCA	PNKP	1.92	0.94	1001.76	520.89	1.11e-07	1.17e-06
BRCA	PNKP	1.78	0.84	533.04	298.75	4.24e-27	1.83e-26
CHOL	PNKP	1.41	0.49	926.91	658.76	0.00702	0.0138
COAD	PNKP	1.43	0.51	696.67	488.6	4.37e-10	1.15e-09
HNSC	PNKP	1.21	0.28	608.12	502.38	0.0137	0.0225
KICH	PNKP	1.76	0.81	949.53	540	5.61e-09	2.66e-08
KIRC	PNKP	1.29	0.37	461.65	357.24	0.000234	0.000329
KIRP	PNKP	1.52	0.61	837.56	549.66	8.64e-09	3.08e-08
LIHC	PNKP	1.32	0.4	681.84	515.69	9.74e-05	0.000196
LUAD	PNKP	1.41	0.5	592.99	420.74	1.07e-09	2.64e-09
LUSC	PNKP	1.66	0.73	703.69	423.33	9.93e-15	2.73e-14
PRAD	REV3L	-1.69	-0.75	495.14	834.54	8.54e-12	5.85e-11
READ	REV3L	-1.93	-0.95	354.18	684.16	1.22e-05	7.63e-05
THCA	REV3L	-1.36	-0.45	650.99	886.83	2.57e-12	1e-11
UCEC	REV3L	-1.96	-0.97	987.97	1937.65	1.05e-09	3.62e-09
BLCA	REV3L	-3.23	-1.69	368.2	1187.85	1.26e-07	1.29e-06
BRCA	REV3L	-2.18	-1.13	641.64	1400.31	1.48e-41	1.47e-40
COAD	REV3L	-1.49	-0.57	365.8	543.36	6.49e-10	1.69e-09
ESCA	REV3L	-1.74	-0.8	973.04	1691.03	0.00119	0.00557
HNSC	REV3L	-1.2	-0.26	565	676.67	0.0264	0.0408
KICH	REV3L	-1.62	-0.69	333.31	538.32	9e-07	2.55e-06
KIRC	REV3L	-1.13	-0.18	616.58	697.22	0.00116	0.00156
LIHC	REV3L	-1.32	-0.4	316.09	418.26	3.34e-06	8.18e-06
LUAD	REV3L	-1.93	-0.95	519.72	1001.95	1.08e-21	7.65e-21
LUSC	REV3L	-1.98	-0.98	543.37	1074.07	1.2e-25	9.28e-25
PRAD	RFC3	1.44	0.52	282.18	196.31	3.6e-06	9.84e-06
READ	RFC3	3.01	1.59	852.4	283.31	1.52e-06	1.87e-05
STAD	RFC3	3.41	1.77	722.41	212.01	2.11e-18	8.55e-16
UCEC	RFC3	2	1	488.18	243.6	3.42e-10	1.26e-09
BLCA	RFC3	2.27	1.18	410.04	180.77	6.82e-07	5.26e-06
BRCA	RFC3	1.69	0.76	437.64	258.46	4.26e-20	1.31e-19
CHOL	RFC3	1.67	0.74	215.28	129.27	0.00124	0.00297
COAD	RFC3	3.49	1.8	801.07	229.83	3.54e-23	8.25e-22
ESCA	RFC3	3.55	1.83	704.8	198.53	2.45e-07	2.57e-05
GBM	RFC3	2.38	1.25	410.57	172.48	0.00143	0.00449
HNSC	RFC3	1.8	0.85	378.25	210.43	1.34e-11	1.13e-10
KICH	RFC3	-1.67	-0.74	116.47	194.18	1.19e-07	4.04e-07
LIHC	RFC3	2.13	1.09	241.98	113.54	1.27e-14	9.03e-14
LUAD	RFC3	1.88	0.91	319.25	169.66	5.37e-14	1.9e-13
LUSC	RFC3	2.81	1.49	480.9	171.07	1.15e-28	1.57e-27
PRAD	PPP4C	1.26	0.33	1624.2	1290.58	2.41e-06	6.74e-06
READ	PPP4C	1.58	0.66	2888.42	1827.72	0.0153	0.0288
THCA	PPP4C	1.57	0.65	1816.57	1158.01	3.9e-24	8.95e-23
UCEC	PPP4C	2.66	1.41	3705.19	1394.83	4.76e-21	2.85e-19
BLCA	PPP4C	1.77	0.82	3488.86	1974.17	1.41e-06	9.72e-06
BRCA	PPP4C	2.55	1.35	2502.37	980.47	5.27e-57	2.36e-55
CHOL	PPP4C	-1.09	-0.13	2252.47	2462.97	0.0205	0.0357
COAD	PPP4C	1.43	0.51	2834.77	1987.67	4.11e-05	6.98e-05
ESCA	PPP4C	1.69	0.76	1815.74	1074.07	0.000347	0.00222
GBM	PPP4C	3.19	1.67	2024.93	635.45	0.000148	0.00178
HNSC	PPP4C	1.21	0.28	2796.77	2311.15	0.00654	0.0114
KIRC	PPP4C	1.27	0.35	1446.42	1137.71	1.63e-07	2.76e-07
KIRP	PPP4C	1.66	0.73	2173.81	1313.02	1.05e-12	7.68e-12
LUAD	PPP4C	1.6	0.68	2332.7	1459.98	2.19e-17	1.04e-16
LUSC	PPP4C	1.68	0.75	2471.9	1473.33	1.12e-17	3.78e-17
PRAD	RMI1	1.41	0.5	444.5	314.81	4.7e-07	1.46e-06
STAD	RMI1	1.63	0.7	388.17	238.56	3.51e-08	2.53e-07
THCA	RMI1	-1.15	-0.2	203.81	234.37	0.000243	0.000409
UCEC	RMI1	1.84	0.88	358.61	195.29	3.3e-09	1.07e-08
BLCA	RMI1	2.08	1.06	316.68	152.07	1.53e-06	1.04e-05
BRCA	RMI1	2.21	1.14	450.13	203.81	7.94e-45	1e-43
GBM	RMI1	2.28	1.19	387.26	169.51	0.000472	0.00219
HNSC	RMI1	1.46	0.54	391.36	268.56	3.64e-05	9.63e-05
KIRC	RMI1	-1.15	-0.2	210.07	240.74	5.97e-06	9.27e-06
KIRP	RMI1	-1.13	-0.18	149.1	168.56	0.0154	0.0224
LIHC	RMI1	1.47	0.55	241.37	164.39	2.07e-05	4.55e-05
LUAD	RMI1	1.83	0.87	328.47	179.29	1.07e-20	6.9e-20
LUSC	RMI1	2.7	1.43	449.04	166.51	3.25e-24	2.03e-23
PRAD	WEE1	-1.28	-0.36	719.5	923.18	4.38e-05	0.000101
UCEC	WEE1	-1.24	-0.31	988.14	1224.3	0.0112	0.0163
BLCA	WEE1	-3.5	-1.81	1174.48	4112.07	1.58e-06	1.07e-05
BRCA	WEE1	-1.67	-0.74	1256.52	2093.31	2.63e-09	4.84e-09
CHOL	WEE1	-2.97	-1.57	813.56	2418.73	0.000852	0.00214
COAD	WEE1	1.54	0.62	931.77	605.28	1.15e-09	2.91e-09
GBM	WEE1	17.76	4.15	1142.22	64.32	0.000148	0.00178
HNSC	WEE1	-1.63	-0.71	1067.48	1743.74	0.00156	0.00307
KICH	WEE1	-3.35	-1.75	352.35	1181.64	1.18e-10	1.05e-09
KIRC	WEE1	-1.52	-0.6	658.98	999.49	8.2e-13	1.85e-12
KIRP	WEE1	-2.33	-1.22	323.3	752.81	5.55e-14	5.47e-13
LIHC	WEE1	-2.3	-1.2	842.04	1939.02	4.05e-12	2.09e-11
LUSC	WEE1	1.47	0.56	1106.67	750.97	1.4e-07	2.49e-07
READ	XRCC1	1.49	0.58	807.57	541.71	2.11e-05	0.000116
THCA	XRCC1	1.26	0.33	1130.69	899.08	6.41e-15	3.34e-14
BLCA	XRCC1	1.4	0.49	1090.05	776.17	5.56e-06	3.1e-05
BRCA	XRCC1	1.37	0.45	913.48	668.58	4.71e-19	1.38e-18
CHOL	XRCC1	1.95	0.96	997.74	512.52	1.02e-07	9.84e-07
COAD	XRCC1	1.36	0.45	791.32	580.26	1.36e-09	3.43e-09
HNSC	XRCC1	1.32	0.4	804.23	609.63	3.34e-07	1.25e-06
KIRC	XRCC1	1.32	0.4	747.48	564.71	2.42e-19	7.95e-19
KIRP	XRCC1	1.28	0.36	840.01	654.97	3.04e-08	9.95e-08
LIHC	XRCC1	1.71	0.77	725.6	425.46	2.68e-21	6.09e-20
LUSC	XRCC1	1.24	0.31	843.7	681.52	0.000183	0.000266
PRAD	RTEL1	1.26	0.34	433.1	343.3	3.27e-06	8.98e-06
READ	RTEL1	5.07	2.34	1394.34	275.26	2.3e-07	1.01e-05
STAD	RTEL1	2.01	1.01	873.6	433.88	9.15e-11	1.24e-09
UCEC	RTEL1	1.66	0.73	756.83	456.7	1.61e-07	4.24e-07
BLCA	RTEL1	1.63	0.7	633.35	388.98	8.85e-06	4.59e-05
BRCA	RTEL1	1.57	0.65	461.7	293.46	1.06e-13	2.42e-13
CHOL	RTEL1	1.44	0.52	575.73	400.94	0.00932	0.0178
COAD	RTEL1	2.36	1.24	1157.62	490.43	2.08e-13	7.59e-13
HNSC	RTEL1	1.35	0.43	498.02	368.66	6.99e-06	2.08e-05
KICH	RTEL1	1.43	0.52	395.26	275.54	0.000236	0.000449
KIRC	RTEL1	2.8	1.49	510.87	182.33	1.72e-33	2.35e-32
KIRP	RTEL1	1.93	0.95	582.93	301.83	7.15e-09	2.58e-08
LIHC	RTEL1	1.91	0.93	526.31	275.82	1.26e-17	1.42e-16
LUAD	RTEL1	2.13	1.09	583.96	274.26	1.3e-17	6.26e-17
LUSC	RTEL1	1.49	0.58	477.48	319.66	1.45e-05	2.27e-05
PRAD	PRPF19	1.28	0.36	4520.17	3530.36	8.22e-11	4.75e-10
READ	PRPF19	1.64	0.71	3953.54	2414.35	6.07e-05	0.000272
STAD	PRPF19	1.22	0.29	2530.73	2074.24	0.00343	0.0077
THCA	PRPF19	1.2	0.26	2590.92	2164.93	2.92e-16	1.79e-15
UCEC	PRPF19	1.41	0.5	3856.9	2729.65	2.04e-09	6.77e-09
BLCA	PRPF19	1.35	0.43	3576.19	2651.67	2.41e-05	0.000109
BRCA	PRPF19	1.64	0.71	3645.99	2227.68	6.43e-38	5.08e-37
COAD	PRPF19	1.56	0.64	3837.77	2466.74	2.07e-18	1.44e-17
ESCA	PRPF19	1.85	0.89	2344.92	1266.59	2.49e-05	0.000332
CHOL	PRPF19	-1.11	-0.15	2635.56	2931.59	0.0159	0.0286
GBM	PRPF19	-2.04	-1.03	2598.31	5306.21	0.000181	0.00178
KICH	PRPF19	1.2	0.27	2041.68	1696.93	1.65e-05	3.77e-05
KIRC	PRPF19	1.08	0.11	1849.59	1716.54	0.00982	0.0124
KIRP	PRPF19	1.17	0.23	2153.44	1838.24	0.000322	0.000593
LUAD	PRPF19	1.58	0.66	2460.62	1559.19	7.91e-27	1.02e-25
LUSC	PRPF19	2.15	1.1	3606.63	1678.12	6.07e-30	1.26e-28
PRAD	KAT5	-1.09	-0.12	1171.44	1273.24	0.000209	0.000437
READ	KAT5	-1.27	-0.34	923.58	1171.43	0.000224	0.000787
STAD	KAT5	-1.42	-0.51	856.89	1219.09	6.33e-15	3.33e-13
UCEC	KAT5	-1.41	-0.5	1076.72	1520.8	4.06e-12	1.95e-11
BLCA	KAT5	-1.26	-0.34	1016.83	1286.07	2.62e-05	0.000118
BRCA	KAT5	-1.04	-0.06	937.07	978.37	0.00732	0.00931
COAD	KAT5	-1.18	-0.24	965.98	1139.47	1.35e-09	3.4e-09
GBM	KAT5	-1.2	-0.26	1131.36	1356.85	0.0248	0.0446
HNSC	KAT5	-1.12	-0.16	1022.16	1141.95	1.35e-05	3.84e-05
KICH	KAT5	1.36	0.44	1578.61	1161.51	1.03e-06	2.89e-06
KIRP	KAT5	-1.25	-0.32	975.57	1220.96	4.01e-11	2.13e-10
LUAD	KAT5	-1.29	-0.37	933.86	1206	8.54e-19	4.57e-18
LUSC	KAT5	-1.27	-0.35	942.64	1201.53	5.01e-13	1.24e-12
PRAD	CDK7	1.35	0.44	465.92	344.45	7.27e-11	4.24e-10
READ	CDK7	1.36	0.45	502.83	368.99	0.0128	0.0248
STAD	CDK7	-1.01	-0.02	350.22	354.03	0.0143	0.0274
THCA	CDK7	1.43	0.52	540.17	376.8	2.97e-21	3.91e-20
UCEC	CDK7	1.57	0.65	529.23	336.57	9.38e-10	3.26e-09
BLCA	CDK7	1.51	0.59	512.66	340.31	2.65e-05	0.000119
BRCA	CDK7	1.53	0.62	567.76	370.1	1.26e-31	6.92e-31
CHOL	CDK7	1.88	0.91	564.05	299.82	1.9e-05	7.61e-05
COAD	CDK7	1.59	0.67	550.2	345.63	1.75e-13	6.45e-13
ESCA	CDK7	1.16	0.21	346.46	299.58	0.00906	0.0271
HNSC	CDK7	-1.26	-0.33	530.9	668.98	0.000645	0.00136
KIRC	CDK7	1.49	0.58	519.21	348.18	3.36e-18	1.03e-17
KIRP	CDK7	1.58	0.66	468.18	296.41	9.9e-12	5.91e-11
LIHC	CDK7	1.44	0.53	388.49	269.95	1.51e-08	4.93e-08
LUAD	CDK7	1.54	0.62	492.97	320.1	2.97e-14	1.07e-13
LUSC	CDK7	1.42	0.51	437.69	307.61	1.38e-10	2.94e-10
PRAD	NSMCE3	-1.2	-0.26	460.11	550.25	9.55e-08	3.3e-07
READ	NSMCE3	-1.26	-0.34	312.86	395.16	0.0281	0.049
STAD	NSMCE3	-1.59	-0.67	383.04	607.37	1.38e-09	1.39e-08
THCA	NSMCE3	-1.58	-0.66	556.13	881.47	8.26e-25	2.21e-23
UCEC	NSMCE3	-1.55	-0.63	462.42	717.47	4.65e-13	2.58e-12
BLCA	NSMCE3	-1.27	-0.35	411.09	523.78	6.22e-05	0.000249
BRCA	NSMCE3	-1.14	-0.19	372.76	423.92	4.08e-11	8.24e-11
CHOL	NSMCE3	-1.51	-0.59	302.94	457.27	4.33e-07	3.18e-06
KICH	NSMCE3	1.35	0.44	589.1	435.58	6.98e-06	1.69e-05
LIHC	NSMCE3	-1.13	-0.18	359.81	406.31	0.000273	0.000519
LUAD	NSMCE3	-1.3	-0.38	386.76	502.58	1.15e-14	4.31e-14
LUSC	NSMCE3	-1.11	-0.15	440.9	489.78	0.00067	0.000938
PRAD	POLD2	1.74	0.8	3133.76	1804.31	1.03e-19	4.92e-18
READ	POLD2	2.52	1.33	3589.58	1424.18	7.2e-07	1.25e-05
THCA	POLD2	-1.22	-0.28	1231.3	1500.04	8.45e-11	2.81e-10
UCEC	POLD2	1.67	0.74	3325.57	1995.59	2.56e-09	8.42e-09
BLCA	POLD2	1.56	0.64	2460.89	1578.39	0.000194	0.000669
BRCA	POLD2	1.66	0.73	2108.54	1273.97	6.63e-26	2.69e-25
CHOL	POLD2	-1.69	-0.75	2067.39	3486.41	4.09e-05	0.000148
COAD	POLD2	2.44	1.29	3323.72	1360.31	1.52e-23	4.15e-22
ESCA	POLD2	1.83	0.87	1967.67	1077.34	0.000221	0.00159
GBM	POLD2	2.35	1.23	3033.4	1292.17	0.000196	0.00178
HNSC	POLD2	1.23	0.3	3325.75	2694.48	0.013	0.0214
KIRC	POLD2	1.44	0.52	1876.52	1305.33	2.03e-15	5.27e-15
KIRP	POLD2	1.86	0.89	2887.08	1554.08	2.13e-14	2.32e-13
LUAD	POLD2	1.75	0.81	1946.68	1109.88	6.63e-19	3.58e-18
LUSC	POLD2	2.46	1.3	2852.68	1158.95	7.66e-28	8.69e-27
PRAD	DUT	1.22	0.29	1108.25	906.44	1.16e-06	3.4e-06
THCA	DUT	-1.27	-0.35	1020.45	1298.08	4.38e-08	1.1e-07
UCEC	DUT	-1.22	-0.28	974.78	1186.1	1.65e-05	3.42e-05
BLCA	DUT	1.31	0.39	1243.89	951.48	0.000972	0.00271
BRCA	DUT	1.21	0.28	1019.36	841.04	3.04e-05	4.54e-05
CHOL	DUT	1.45	0.54	1071.69	738.24	0.00637	0.0127
COAD	DUT	1.22	0.29	1103.17	901.94	0.0194	0.0254
ESCA	DUT	1.61	0.69	907.61	561.99	0.000593	0.00328
HNSC	DUT	1.44	0.52	1276.33	888.24	2.88e-06	9.21e-06
KICH	DUT	1.4	0.48	1255.56	898.02	5.9e-06	1.45e-05
KIRC	DUT	-1.01	-0.01	767.86	773.75	0.0373	0.0447
KIRP	DUT	1.17	0.22	854.92	732.15	0.00218	0.00357
LIHC	DUT	1.69	0.76	1119.61	662.31	1.52e-11	7.27e-11
LUSC	DUT	1.7	0.77	1256.55	738.91	3.69e-16	1.11e-15
PRAD	TOP3A	1.13	0.18	383.35	337.97	0.00121	0.00224
STAD	TOP3A	1.27	0.34	547.05	430.84	0.000315	0.0009
UCEC	TOP3A	1.44	0.53	469.83	325.31	3.65e-09	1.18e-08
BLCA	TOP3A	1.42	0.51	453.91	318.57	0.00132	0.00354
BRCA	TOP3A	1.2	0.27	492.5	408.89	4.85e-06	7.58e-06
HNSC	TOP3A	1.31	0.39	532.99	407.68	1.65e-06	5.49e-06
KICH	TOP3A	1.19	0.25	367.74	309.48	0.0123	0.018
KIRC	TOP3A	1.16	0.21	382.76	329.97	9.2e-09	1.67e-08
KIRP	TOP3A	1.16	0.22	420.28	361.97	0.0013	0.00219
LIHC	TOP3A	-1.04	-0.06	393.89	411.18	0.0163	0.024
LUAD	TOP3A	1.27	0.34	422.37	333.8	1.37e-05	2.45e-05
LUSC	TOP3A	1.44	0.53	523.2	363.18	1.29e-08	2.43e-08
PRAD	ERCC2	1.24	0.31	558.03	448.83	2.5e-07	8.12e-07
READ	ERCC2	1.67	0.74	588.12	352.74	0.000636	0.00188
THCA	ERCC2	-1.05	-0.07	433.53	453.56	0.00136	0.00211
UCEC	ERCC2	1.45	0.54	709.95	489.82	0.000141	0.000262
BLCA	ERCC2	1.33	0.41	589.97	443.94	0.00246	0.00605
BRCA	ERCC2	1.26	0.33	420.23	334.67	1.69e-08	3e-08
COAD	ERCC2	1.5	0.58	570.52	381.18	3.35e-10	8.93e-10
KIRC	ERCC2	-1.06	-0.08	396.72	418.91	7e-05	0.000102
LIHC	ERCC2	1.42	0.5	620.87	438.22	1.07e-06	2.79e-06
LUAD	ERCC2	1.47	0.55	475.24	323.88	3.99e-12	1.2e-11
LUSC	ERCC2	1.44	0.53	502.45	348.05	4.88e-08	8.91e-08
PRAD	MUS81	1.08	0.11	554.23	513.67	0.0276	0.0408
STAD	MUS81	-1.24	-0.31	576.01	715.24	3.31e-05	0.000119
THCA	MUS81	1.15	0.21	647.48	561.44	2.56e-08	6.54e-08
UCEC	MUS81	-1.09	-0.13	714.68	781.66	0.0106	0.0155
BLCA	MUS81	1.25	0.33	744.08	593.56	0.00414	0.00958
BRCA	MUS81	1.29	0.37	533.08	413.42	3.07e-10	5.92e-10
CHOL	MUS81	1.25	0.33	693.34	553.47	0.0173	0.0308
HNSC	MUS81	1.3	0.37	588.35	453.87	5.16e-07	1.87e-06
KICH	MUS81	1.24	0.32	762.22	612.46	0.00269	0.00438
KIRC	MUS81	1.48	0.57	553.78	373.27	1.48e-24	6.95e-24
KIRP	MUS81	1.17	0.23	585.94	499.11	0.00117	0.00199
LIHC	MUS81	1.44	0.53	567.87	394.34	1.05e-17	1.21e-16
LUAD	MUS81	1.32	0.4	631.62	478.82	5.8e-12	1.72e-11
LUSC	MUS81	1.23	0.29	610.72	497.99	3.12e-05	4.78e-05
THCA	HERC2	-1.25	-0.32	1666.05	2085.43	6.15e-11	2.08e-10
UCEC	HERC2	-1.12	-0.16	1698.86	1898.53	0.0133	0.0191
BLCA	HERC2	-1.32	-0.4	1233.03	1630.74	0.00626	0.0137
BRCA	HERC2	-1.38	-0.47	1513.79	2093.15	7.91e-24	2.91e-23
ESCA	HERC2	-1.24	-0.31	2440.67	3035.09	0.0147	0.0396
GBM	HERC2	-3.46	-1.79	1309.04	4527.48	0.000148	0.00178
KICH	HERC2	1.53	0.62	2113.09	1379.12	1.92e-06	5.14e-06
KIRC	HERC2	-1.34	-0.42	1307.22	1747.46	6.34e-13	1.44e-12
KIRP	HERC2	-1.24	-0.31	1454.05	1800.55	1.09e-05	2.45e-05
LUAD	HERC2	-1.13	-0.18	1227.3	1392.63	0.000297	0.000475
PRAD	PLRG1	-1.12	-0.16	676.91	758.82	2.32e-09	1.05e-08
STAD	PLRG1	-1.04	-0.06	667.05	695.1	0.00316	0.00715
THCA	PLRG1	1.29	0.37	1256.43	971.9	1.61e-05	3.09e-05
UCEC	PLRG1	-1.08	-0.11	821.12	885.67	0.00162	0.00264
BLCA	PLRG1	-1.13	-0.18	751.96	849.8	0.00671	0.0146
BRCA	PLRG1	-1.18	-0.24	823.36	975.33	1.41e-26	5.93e-26
CHOL	PLRG1	-1.42	-0.5	668.24	948.22	4.9e-05	0.000173
GBM	PLRG1	1.27	0.34	887.19	699.8	0.012	0.0241
HNSC	PLRG1	-1.09	-0.12	1005.97	1095.5	0.00886	0.0151
KIRC	PLRG1	-1.18	-0.24	750.14	885.59	2.72e-17	7.89e-17
KIRP	PLRG1	-1.15	-0.2	696.24	798.96	8.78e-07	2.29e-06
LUAD	PLRG1	1.2	0.27	871	724.65	0.000122	0.000202
LUSC	PLRG1	1.25	0.32	905.31	724.7	0.000111	0.000164
PRAD	CCNH	1.28	0.35	772.94	604.88	0.000264	0.000545
THCA	CCNH	1.24	0.31	760.12	612.97	4.48e-16	2.68e-15
BLCA	CCNH	-1.28	-0.36	453.36	580.03	0.00702	0.0152
BRCA	CCNH	-1.28	-0.36	530.58	680.65	4.63e-15	1.12e-14
CHOL	CCNH	-1.74	-0.8	515.72	895.67	3.4e-05	0.000125
COAD	CCNH	1.28	0.36	537.39	419.24	7.83e-06	1.42e-05
HNSC	CCNH	-1.21	-0.27	395.68	478.44	9.93e-07	3.43e-06
KICH	CCNH	-1.21	-0.27	475.13	573.75	0.0363	0.0495
LIHC	CCNH	-1.36	-0.45	543.35	740.26	1.1e-10	4.67e-10
LUAD	CCNH	-1.13	-0.18	454.58	514.2	0.000161	0.000264
LUSC	CCNH	-1.43	-0.51	383.29	546.69	4.04e-15	1.13e-14
PRAD	NHEJ1	1.11	0.15	309.04	279.22	0.0167	0.0256
READ	NHEJ1	-1.69	-0.76	526.03	891.56	0.000367	0.00119
THCA	NHEJ1	1.19	0.26	148.7	124.48	3.09e-09	8.71e-09
BLCA	NHEJ1	-1.18	-0.24	213.96	252.16	0.011	0.0223
BRCA	NHEJ1	-1.41	-0.49	212.88	299.17	2.18e-33	1.31e-32
COAD	NHEJ1	-1.68	-0.75	499.59	838.98	3.29e-16	1.68e-15
GBM	NHEJ1	1.42	0.51	172.99	121.42	0.0035	0.00882
KICH	NHEJ1	-1.74	-0.8	178.2	310.09	1.06e-08	4.67e-08
KIRC	NHEJ1	1.39	0.48	511.75	366.99	3.33e-09	6.19e-09
KIRP	NHEJ1	-1.18	-0.24	309.38	366.15	0.000564	0.001
PRAD	ATRIP	1.41	0.49	315.16	223.82	6.74e-13	5.64e-12
READ	ATRIP	1.74	0.8	246.42	141.33	4.75e-05	0.000223
STAD	ATRIP	1.21	0.27	181.69	150.38	0.00731	0.0151
THCA	ATRIP	-1.07	-0.09	266.05	283.47	3.93e-05	7.22e-05
UCEC	ATRIP	1.38	0.46	338.53	245.48	4.72e-05	9.31e-05
BLCA	ATRIP	1.21	0.28	300.93	248.62	0.0158	0.0306
BRCA	ATRIP	1.57	0.65	386.56	246.31	5.12e-20	1.57e-19
COAD	ATRIP	1.7	0.77	216.78	127.16	6.49e-19	4.92e-18
GBM	ATRIP	1.6	0.68	224.24	140.27	0.00182	0.00536
KICH	ATRIP	1.72	0.78	232.97	135.79	1.97e-08	8.13e-08
KIRC	ATRIP	-1.08	-0.11	129.49	139.43	2.16e-07	3.64e-07
KIRP	ATRIP	1.25	0.32	187.7	150.27	0.00143	0.0024
LIHC	ATRIP	1.72	0.78	236.95	137.91	1.79e-16	1.68e-15
LUAD	ATRIP	1.1	0.13	181.74	165.97	0.0346	0.0447
LUSC	ATRIP	1.2	0.26	206.09	171.68	3.94e-05	5.99e-05
PRAD	ERCC3	1.06	0.09	1060.88	999.82	0.00984	0.0157
READ	ERCC3	1.24	0.32	933.3	749.71	0.00209	0.0052
THCA	ERCC3	1.04	0.05	931.48	896.64	0.015	0.0206
BLCA	ERCC3	1.14	0.19	1130.86	990.48	0.0214	0.0399
CHOL	ERCC3	1.69	0.76	1201.43	710.99	2.26e-09	4.67e-08
COAD	ERCC3	1.34	0.42	906.81	675.92	7.25e-16	3.53e-15
GBM	ERCC3	-1.13	-0.18	1257.34	1424.65	0.0212	0.0391
HNSC	ERCC3	1.18	0.24	1078.71	916.23	9.23e-07	3.2e-06
KICH	ERCC3	-1.12	-0.17	757.7	851.8	0.000144	0.000283
KIRC	ERCC3	1.27	0.34	923.74	728.05	5.42e-19	1.74e-18
KIRP	ERCC3	1.22	0.29	942.59	772.7	1.11e-06	2.86e-06
LIHC	ERCC3	1.21	0.28	765.05	632.23	1.44e-08	4.7e-08
LUAD	ERCC3	1.29	0.37	1168.88	904.86	1.21e-16	5.38e-16
LUSC	ERCC3	1.39	0.47	1315.25	947.08	1.32e-17	4.41e-17
PRAD	GTF2H1	-1.08	-0.11	730.57	791.01	0.00125	0.00231
THCA	GTF2H1	-1.35	-0.44	638.08	863.86	5.56e-22	8.28e-21
UCEC	GTF2H1	-1.32	-0.4	531.06	698.74	2.51e-10	9.45e-10
BLCA	GTF2H1	-1.17	-0.23	640.17	749.33	0.0246	0.045
BRCA	GTF2H1	-1.25	-0.32	817.42	1023.04	2.94e-25	1.16e-24
COAD	GTF2H1	1.12	0.16	727.56	651.08	0.004	0.00565
KICH	GTF2H1	-1.24	-0.31	537.16	666.49	0.000898	0.00156
KIRP	GTF2H1	-1.14	-0.19	574.56	657.08	0.000104	0.000205
LUAD	GTF2H1	-1.07	-0.1	714.24	765.44	0.000385	0.000608
LUSC	GTF2H1	1.22	0.28	910.42	748.76	0.000657	0.000919
PRAD	LIG3	1.54	0.62	1237.6	802.82	2.15e-15	2.97e-14
READ	LIG3	1.66	0.73	691.56	417.3	2.57e-05	0.000136
STAD	LIG3	1.4	0.48	619.46	443.12	6.89e-07	3.65e-06
THCA	LIG3	-1.09	-0.12	496.91	540.1	0.00118	0.00184
BRCA	LIG3	1.87	0.9	962	514.6	3.14e-35	2.09e-34
COAD	LIG3	1.47	0.56	661.76	449.66	1.14e-12	3.85e-12
KICH	LIG3	-1.32	-0.4	263.58	348.53	1.06e-05	2.49e-05
KIRC	LIG3	-1.11	-0.15	363.65	404.58	3.77e-08	6.62e-08
LIHC	LIG3	1.54	0.63	499	323.24	4.58e-15	3.5e-14
LUAD	LIG3	1.81	0.85	655.87	362.64	6.42e-25	6.48e-24
LUSC	LIG3	2.23	1.16	888.72	397.96	3.2e-23	1.79e-22
THCA	RFC1	-1.18	-0.24	1284.7	1513.8	3.7e-08	9.33e-08
UCEC	RFC1	-1.43	-0.51	907.8	1296.22	8.73e-10	3.04e-09
BRCA	RFC1	-1.21	-0.27	1437.87	1738.45	2.81e-15	6.89e-15
HNSC	RFC1	1.14	0.19	1248.67	1097.57	0.0187	0.0298
KICH	RFC1	1.22	0.29	1505.77	1230.46	0.00153	0.00257
KIRC	RFC1	-1.19	-0.25	1291.66	1539.89	8.89e-09	1.61e-08
KIRP	RFC1	-1.31	-0.39	996.91	1303.2	1.09e-08	3.84e-08
LIHC	RFC1	1.37	0.45	1619.06	1183.18	2.61e-07	7.29e-07
LUAD	RFC1	-1.15	-0.2	1220.13	1398.64	2.61e-06	4.99e-06
LUSC	RFC1	-1.14	-0.19	1200.31	1371.68	0.000112	0.000165
THCA	DDB1	1.17	0.22	6770.62	5811.33	3.26e-10	1.02e-09
BRCA	DDB1	1.24	0.31	7035.57	5694.25	1.89e-12	4.05e-12
COAD	DDB1	1.09	0.12	5297.37	4865.04	0.00435	0.00612
GBM	DDB1	-1.39	-0.48	5464.43	7605.33	0.00125	0.00406
KICH	DDB1	1.82	0.86	10328.5	5684.51	1.88e-10	1.54e-09
KIRC	DDB1	-1.39	-0.48	5334.55	7437.58	1.27e-27	7.76e-27
KIRP	DDB1	-1.3	-0.38	5319.52	6936.06	4.17e-11	2.21e-10
LIHC	DDB1	1.17	0.23	5177.06	4420.75	3.28e-06	8.04e-06
LUAD	DDB1	1.23	0.3	5538.8	4498.05	1.18e-10	3.15e-10
LUSC	DDB1	1.32	0.4	6242.81	4730.63	3.96e-11	8.69e-11
PRAD	XRCC5	-1.05	-0.07	5621.56	5906.62	0.0156	0.024
READ	XRCC5	1.2	0.27	7200.67	5975.9	0.00707	0.0148
STAD	XRCC5	1.16	0.21	6078.35	5236.93	0.00104	0.00263
THCA	XRCC5	1.08	0.11	6825.14	6338.35	0.00171	0.00262
UCEC	XRCC5	1.18	0.23	7179.86	6109.63	0.000666	0.00114
BRCA	XRCC5	1.18	0.24	8153.2	6881.78	3.62e-12	7.68e-12
COAD	XRCC5	1.25	0.32	7096.59	5670.48	1.64e-10	4.51e-10
ESCA	XRCC5	1.27	0.34	6246.74	4921.05	0.0045	0.0157
GBM	XRCC5	1.27	0.35	5683.45	4463.83	0.0123	0.0247
HNSC	XRCC5	-1.1	-0.14	6617.68	7295.96	0.00442	0.00798
KICH	XRCC5	-1.58	-0.66	3331.29	5254.87	4.21e-10	2.98e-09
KIRC	XRCC5	-1.15	-0.21	5666.52	6534.69	1.9e-09	3.57e-09
KIRP	XRCC5	1.12	0.16	5788.71	5183.11	0.00805	0.0121
LIHC	XRCC5	-1.11	-0.15	5419.15	6026.34	0.000139	0.000275
LUAD	XRCC5	1.3	0.38	6627.5	5085.19	3.18e-13	1.05e-12
LUSC	XRCC5	1.36	0.44	7154.01	5256.29	1.62e-10	3.43e-10
PRAD	SPRTN	-1.15	-0.2	140.14	161.25	0.000202	0.000422
STAD	SPRTN	1.34	0.43	255.98	190.59	3.05e-07	1.76e-06
THCA	SPRTN	-1.3	-0.38	135.29	176.36	1.99e-12	7.84e-12
UCEC	SPRTN	1.3	0.38	208.26	160.4	0.000713	0.00122
BRCA	SPRTN	1.29	0.37	299.13	231.83	1.27e-10	2.51e-10
ESCA	SPRTN	1.42	0.51	323.18	227.46	0.00242	0.00968
GBM	SPRTN	1.4	0.49	245.29	175.13	0.0145	0.0284
KICH	SPRTN	-1.58	-0.66	106.97	168.57	6.62e-10	4.33e-09
KIRC	SPRTN	-1.17	-0.22	165.77	193.19	2.69e-09	5.02e-09
KIRP	SPRTN	-1.27	-0.34	125.83	159.3	5.82e-07	1.56e-06
LIHC	SPRTN	1.31	0.39	174.24	132.6	1.14e-06	2.95e-06
LUAD	SPRTN	1.36	0.44	251.39	185.21	1.66e-11	4.77e-11
LUSC	SPRTN	1.79	0.84	320.13	178.82	6.39e-23	3.47e-22
STAD	NFATC2IP	1.23	0.29	993.32	810.03	2.04e-05	7.74e-05
UCEC	NFATC2IP	1.16	0.22	827.01	712.27	0.0168	0.0238
BRCA	NFATC2IP	1.23	0.29	958.16	781.7	2.03e-10	3.95e-10
CHOL	NFATC2IP	1.39	0.47	752.04	541.96	0.000749	0.00191
HNSC	NFATC2IP	1.29	0.37	903.01	700.62	7.59e-08	3.2e-07
KICH	NFATC2IP	1.5	0.59	706.28	470.26	3.2e-11	3.89e-10
KIRC	NFATC2IP	1.34	0.43	738.16	549.36	1.86e-17	5.42e-17
KIRP	NFATC2IP	1.41	0.5	814.04	577.19	5.41e-08	1.7e-07
LIHC	NFATC2IP	1.33	0.41	538.83	406.1	2.3e-07	6.47e-07
LUAD	NFATC2IP	1.22	0.29	904.37	739.87	7.03e-06	1.29e-05
LUSC	NFATC2IP	1.29	0.36	951.37	739.12	1.15e-06	1.92e-06
PRAD	RPA1	-1.17	-0.23	1947.07	2283.48	4.79e-11	2.89e-10
READ	RPA1	-1.17	-0.23	1557.42	1828.86	0.0192	0.0351
UCEC	RPA1	-1.12	-0.16	1945.11	2170.95	0.00202	0.00323
BRCA	RPA1	-1.08	-0.11	2163.62	2333.92	4.35e-07	7.18e-07
CHOL	RPA1	1.41	0.5	1764.37	1249.09	0.00472	0.00973
COAD	RPA1	-1.08	-0.11	1651.32	1781.85	0.00657	0.00907
GBM	RPA1	1.66	0.73	2601.34	1571.57	0.000611	0.00256
HNSC	RPA1	1.19	0.26	2776.65	2325.31	0.00203	0.00391
KICH	RPA1	-1.32	-0.41	991.71	1313.41	1.31e-07	4.42e-07
KIRC	RPA1	1.13	0.17	1756.58	1559.99	7.97e-08	1.38e-07
KIRP	RPA1	1.3	0.38	1783.95	1371.54	9.96e-09	3.52e-08
LUSC	RPA1	1.71	0.77	2869.43	1682.89	6.31e-18	2.17e-17
PRAD	RNMT	-1.1	-0.13	813.9	892.04	0.00311	0.00539
STAD	RNMT	1.24	0.31	1018.63	820.22	0.000629	0.00168
UCEC	RNMT	-1.21	-0.27	827.88	1000.69	5.69e-06	1.25e-05
BRCA	RNMT	-1.09	-0.12	1065.66	1159.72	3.13e-06	4.95e-06
CHOL	RNMT	1.57	0.65	929.42	591.58	2.81e-05	0.000107
GBM	RNMT	-1.96	-0.97	982.35	1921.01	0.000267	0.00178
KICH	RNMT	1.62	0.7	1128.07	696.27	5.32e-09	2.54e-08
HNSC	RNMT	1.23	0.3	1129.47	919.16	0.0267	0.0412
LIHC	RNMT	1.18	0.24	625.55	528.13	0.000953	0.00168
LUSC	RNMT	1.35	0.43	1158.74	860.99	1.91e-08	3.58e-08
PRAD	XAB2	1.19	0.25	1858.13	1565.5	0.00989	0.0158
READ	XAB2	1.7	0.77	1489.07	873.52	0.000145	0.000551
STAD	XAB2	-1.1	-0.14	1127.63	1241.93	0.00184	0.00442
THCA	XAB2	1.25	0.32	1858.96	1484.49	1.48e-09	4.32e-09
UCEC	XAB2	1.02	0.03	2225.2	2184.82	0.023	0.032
BRCA	XAB2	1.27	0.34	1323.39	1044.72	6.13e-05	8.96e-05
COAD	XAB2	1.38	0.47	1383.02	999.04	2.93e-06	5.51e-06
KICH	XAB2	1.39	0.47	1704.65	1226.6	3.25e-06	8.32e-06
KIRC	XAB2	1.14	0.19	1151.82	1010.49	0.0196	0.024
LIHC	XAB2	1.27	0.34	1550.52	1223.42	0.000342	0.00064
LUAD	XAB2	-1.06	-0.08	1064.94	1129.54	0.0128	0.0173
THCA	XRCC6	1.08	0.11	6053.47	5590.29	1.17e-05	2.27e-05
BRCA	XRCC6	1.13	0.17	6829.2	6066.76	0.0062	0.00793
CHOL	XRCC6	1.31	0.39	6669.11	5099.7	0.00472	0.00973
ESCA	XRCC6	1.35	0.43	5535.58	4115.47	0.00474	0.0163
HNSC	XRCC6	1.16	0.22	8467.71	7294.62	0.00599	0.0106
KIRC	XRCC6	-1.08	-0.11	5364.06	5786.07	1.11e-05	1.7e-05
KIRP	XRCC6	-1.06	-0.08	4913.14	5186.22	0.00864	0.013
LIHC	XRCC6	1.26	0.33	6199.79	4937.86	1.68e-06	4.28e-06
LUAD	XRCC6	1.21	0.27	7098.55	5866.7	2.45e-05	4.31e-05
LUSC	XRCC6	1.61	0.68	9775.6	6085.82	1.84e-18	6.6e-18
STAD	GTF2H2	1.33	0.41	133.76	100.7	0.00834	0.017
THCA	GTF2H2	-1.29	-0.37	116.55	150.21	0.00214	0.00325
UCEC	GTF2H2	2.18	1.13	329	150.83	1.46e-08	4.34e-08
BRCA	GTF2H2	1.39	0.48	183.04	131.35	0.0348	0.0418
COAD	GTF2H2	1.44	0.52	240.75	167.66	0.0194	0.0254
KICH	GTF2H2	-1.88	-0.91	145.73	274.25	0.00178	0.00296
KIRC	GTF2H2	-1.75	-0.8	137.85	240.83	2.15e-08	3.82e-08
LUSC	GTF2H2	1.34	0.42	132.24	98.8	0.0224	0.0277
STAD	GTF2H3	1.34	0.43	314.1	233.68	6.39e-05	0.000215
THCA	GTF2H3	-1.16	-0.22	170.94	198.45	0.000207	0.000352
PRAD	GTF2H3	-1.22	-0.29	194.24	237.6	0.000348	0.000706
BRCA	GTF2H3	-1.03	-0.04	267.18	274.48	0.0411	0.0491
COAD	GTF2H3	1.38	0.46	316.2	229.13	4.45e-08	9.77e-08
ESCA	GTF2H3	1.66	0.73	360.88	217.5	0.000134	0.0011
HNSC	GTF2H3	1.2	0.27	344.39	286.34	0.00524	0.00935
KIRC	GTF2H3	-1.17	-0.23	175.13	205.76	1.44e-05	2.19e-05
LUAD	GTF2H3	1.24	0.31	241.6	194.59	0.000149	0.000244
LUSC	GTF2H3	1.84	0.88	380.54	206.98	8.38e-21	3.67e-20
PRAD	POLD3	-1.3	-0.37	258.71	335.27	3.56e-14	3.88e-13
READ	POLD3	-1.35	-0.44	500.17	677.45	0.015	0.0284
STAD	POLD3	2.02	1.02	861.36	425.39	5.83e-12	1.11e-10
UCEC	POLD3	-1.12	-0.17	455.07	510.78	0.00879	0.013
CHOL	POLD3	2.56	1.36	501.23	195.55	2.71e-08	3.29e-07
ESCA	POLD3	1.96	0.97	747.8	381.73	0.000377	0.00236
GBM	POLD3	1.99	0.99	450.83	227.09	0.00016	0.00178
HNSC	POLD3	1.3	0.38	524.83	404.55	0.00387	0.00707
KICH	POLD3	-1.77	-0.82	220.36	389.31	2.54e-08	1.02e-07
KIRC	POLD3	-1.37	-0.46	394.04	540.53	0.000867	0.00118
KIRP	POLD3	-1.72	-0.78	298.09	512.27	3.11e-08	1.02e-07
LIHC	POLD3	1.5	0.59	271.44	180.58	1.03e-06	2.69e-06
LUSC	POLD3	1.22	0.28	577.84	475.05	0.00204	0.00274
READ	RAD51D	1.45	0.54	189.5	130.61	0.000964	0.00268
STAD	RAD51D	1.45	0.54	163.98	112.91	7.56e-09	6.4e-08
THCA	RAD51D	-1.31	-0.39	158.33	207.41	1.77e-18	1.47e-17
CHOL	RAD51D	1.99	0.99	221.47	111.14	3.11e-07	2.41e-06
COAD	RAD51D	1.43	0.51	190.94	133.91	4.51e-09	1.08e-08
ESCA	RAD51D	1.74	0.8	177.96	102.16	5.11e-05	0.000554
HNSC	RAD51D	1.45	0.54	162.13	111.85	4.57e-08	2.01e-07
KICH	RAD51D	-1.68	-0.75	99.38	166.78	5.92e-10	3.94e-09
KIRC	RAD51D	1.09	0.12	181.58	166.87	0.0143	0.0177
LIHC	RAD51D	1.27	0.34	120.44	95.12	0.0018	0.00306
LUAD	RAD51D	1.22	0.29	183.5	150.49	8.26e-05	0.000139
LUSC	RAD51D	1.48	0.57	241.51	162.95	7.72e-08	1.39e-07
PRAD	ERCC4	-1.22	-0.29	257.25	314.05	4.89e-05	0.000113
THCA	ERCC4	-1.25	-0.32	207.52	259.82	5.38e-08	1.34e-07
UCEC	ERCC4	-1.7	-0.76	165.55	281.05	1.84e-13	1.1e-12
CHOL	ERCC4	-1.61	-0.68	151.26	243.08	0.000214	0.000628
ESCA	ERCC4	-1.23	-0.3	273.46	335.95	0.00951	0.0281
KIRC	ERCC4	-1.17	-0.22	267.93	312.66	9.68e-07	1.58e-06
KIRP	ERCC4	-1.09	-0.12	213.98	233.27	0.0199	0.0283
LIHC	ERCC4	-1.26	-0.33	155.25	195.78	1.4e-05	3.15e-05
PRAD	CDC5L	-1.1	-0.14	960.12	1055.89	0.000105	0.000229
STAD	CDC5L	1.31	0.39	1160.33	884.16	3.27e-05	0.000118
CHOL	CDC5L	-1.37	-0.45	888.21	1214.5	0.000248	0.000715
COAD	CDC5L	1.14	0.19	961.92	841.76	0.000179	0.000286
KICH	CDC5L	-1.27	-0.35	648.78	827.17	5.42e-06	1.34e-05
KIRC	CDC5L	-1.08	-0.11	881.67	950.21	0.000197	0.000279
KIRP	CDC5L	-1.02	-0.03	759.77	775.28	0.000527	0.000943
LUAD	CDC5L	1.29	0.37	1082.29	836.22	6.58e-10	1.65e-09
LUSC	CDC5L	1.34	0.42	1143.39	853.66	5.36e-11	1.17e-10
PRAD	MNAT1	1.24	0.31	252.7	203.16	1.31e-09	6.22e-09
READ	MNAT1	1.34	0.42	173.17	129.56	0.0259	0.0456
UCEC	MNAT1	1.53	0.62	379.21	247.05	8.79e-10	3.06e-09
CHOL	MNAT1	-1.49	-0.58	149.13	222.74	0.000382	0.00105
COAD	MNAT1	1.85	0.88	177.41	96.09	2.17e-14	8.91e-14
ESCA	MNAT1	1.51	0.6	284.53	187.83	0.00392	0.0141
GBM	MNAT1	1.48	0.56	232.32	157.3	0.00777	0.0169
HNSC	MNAT1	1.36	0.44	314.16	231.27	1.77e-05	4.94e-05
KICH	MNAT1	1.54	0.63	301.32	195.31	5.61e-09	2.66e-08
KIRC	MNAT1	-1.2	-0.26	174.55	209.28	2.52e-13	5.82e-13
LIHC	MNAT1	1.18	0.24	204.79	173.06	0.00554	0.00875
LUAD	MNAT1	1.49	0.57	251.91	169.25	9.96e-14	3.44e-13
LUSC	MNAT1	1.89	0.92	319.73	169.4	1.71e-19	6.63e-19
