# Supplementary material for: Pan-cancer analysis of non-oncogene addiction to DNA repair
Source: Research Square preprint supplement (doi:10.21203/rs.3.rs-846744/v1), 2021-09-03
Supplement: Supplementary file 10 [file 2e70be2a80deb04eb0371041.xlsx]

## Sheet: 100 Better GO
source	term_name	term_id	adjusted_p_value	negative_log10_of_adjusted_p_value	term_size	query_size	intersection_size	effective_domain_size	intersections
GO:MF	nucleic acid binding	GO:0003676	1.94674e-32	31.7107	4252	92	77	18679	UBTF,TARDBP,KHDRBS1,YLPM1,HNRNPK,HNRNPR,DHX9,THRAP3,SART3,SAFB,HNRNPU,TP53BP1,ELAVL1,RSRC2,YTHDC1,NRF1,RBMX,FUBP1,HNRNPDL,HNRNPA0,HNRNPM,SCAF8,MFAP1,ERCC3,CTCF,SRSF1,HNRNPA2B1,ILF3,KDM3B,CPSF7,NCOA5,CPSF6,ZNF740,ZMYM3,SFPQ,EP400,XRCC1,ARID1A,ZMYM4,HNRNPL,LRRC47,PUM2,ZBTB49,FUBP3,RBM15B,SMARCA5,ZC3H4,SRSF10,POLDIP3,HNRNPD,EDC3,SF1,TAF1,TFCP2,PPP1R8,HNRNPUL1,HNRNPH3,ADNP,SNRNP200,ZNF2,SMARCAL1,SNW1…
GO:MF	RNA binding	GO:0003723	9.79634e-25	24.0089	1951	92	52	18679	UBTF,TARDBP,KHDRBS1,YLPM1,HNRNPK,HNRNPR,DHX9,THRAP3,SART3,SAFB,HNRNPU,ELAVL1,RSRC2,YTHDC1,RBMX,FUBP1,HNRNPDL,HNRNPA0,HNRNPM,SCAF8,MFAP1,SRSF1,HNRNPA2B1,ILF3,CPSF7,NCOA5,CPSF6,SFPQ,HNRNPL,LRRC47,PUM2,FUBP3,RBM15B,ZC3H4,SRSF10,POLDIP3,HNRNPD,EDC3,SF1,PPP1R8,HNRNPUL1,HNRNPH3,SNRNP200,SNW1,HNRNPLL,DDX50,HNRNPUL2,SRSF3,BCLAF1,EWSR1,GPBP1,RNF20
GO:MF	heterocyclic compound binding	GO:1901363	1.31303e-20	19.8817	6210	92	77	18679	UBTF,TARDBP,KHDRBS1,YLPM1,HNRNPK,HNRNPR,DHX9,THRAP3,SART3,SAFB,HNRNPU,TP53BP1,ELAVL1,RSRC2,YTHDC1,NRF1,RBMX,FUBP1,HNRNPDL,HNRNPA0,HNRNPM,SCAF8,MFAP1,ERCC3,CTCF,SRSF1,HNRNPA2B1,ILF3,KDM3B,CPSF7,NCOA5,CPSF6,ZNF740,ZMYM3,SFPQ,EP400,XRCC1,ARID1A,ZMYM4,HNRNPL,LRRC47,PUM2,ZBTB49,FUBP3,RBM15B,SMARCA5,ZC3H4,SRSF10,POLDIP3,HNRNPD,EDC3,SF1,TAF1,TFCP2,PPP1R8,HNRNPUL1,HNRNPH3,ADNP,SNRNP200,ZNF2,SMARCAL1,SNW1…
GO:MF	organic cyclic compound binding	GO:0097159	3.2561e-20	19.4873	6291	92	77	18679	UBTF,TARDBP,KHDRBS1,YLPM1,HNRNPK,HNRNPR,DHX9,THRAP3,SART3,SAFB,HNRNPU,TP53BP1,ELAVL1,RSRC2,YTHDC1,NRF1,RBMX,FUBP1,HNRNPDL,HNRNPA0,HNRNPM,SCAF8,MFAP1,ERCC3,CTCF,SRSF1,HNRNPA2B1,ILF3,KDM3B,CPSF7,NCOA5,CPSF6,ZNF740,ZMYM3,SFPQ,EP400,XRCC1,ARID1A,ZMYM4,HNRNPL,LRRC47,PUM2,ZBTB49,FUBP3,RBM15B,SMARCA5,ZC3H4,SRSF10,POLDIP3,HNRNPD,EDC3,SF1,TAF1,TFCP2,PPP1R8,HNRNPUL1,HNRNPH3,ADNP,SNRNP200,ZNF2,SMARCAL1,SNW1…
GO:MF	mRNA binding	GO:0003729	4.44193e-17	16.3524	553	92	27	18679	TARDBP,KHDRBS1,HNRNPK,HNRNPR,DHX9,HNRNPU,ELAVL1,YTHDC1,RBMX,FUBP1,HNRNPA0,HNRNPM,SCAF8,SRSF1,HNRNPA2B1,ILF3,CPSF6,HNRNPL,PUM2,FUBP3,HNRNPD,EDC3,SF1,PPP1R8,HNRNPLL,SRSF3,RNF20
GO:MF	DNA binding	GO:0003677	7.60209e-13	12.1191	2488	92	44	18679	UBTF,TARDBP,KHDRBS1,HNRNPK,DHX9,THRAP3,SAFB,HNRNPU,TP53BP1,NRF1,RBMX,FUBP1,HNRNPDL,ERCC3,CTCF,HNRNPA2B1,ILF3,KDM3B,ZNF740,ZMYM3,SFPQ,EP400,XRCC1,ARID1A,ZMYM4,HNRNPL,ZBTB49,FUBP3,SMARCA5,HNRNPD,TAF1,TFCP2,PPP1R8,ADNP,ZNF2,ELF2,SMARCC2,PRDM2,BCLAF1,LDB1,ARID1B,GPBP1,ZNF197,QRICH1
GO:MF	chromatin binding	GO:0003682	2.95242e-10	9.52982	573	92	21	18679	UBTF,DHX9,SAFB,HNRNPU,RBMX,BRD2,ERCC3,CTCF,KDM3B,NCOA5,SFPQ,EP400,WDR82,ARID1A,SMARCA5,HNRNPD,ADNP,SMARCC2,LDB1,ARID1B,RNF20
GO:MF	transcription coregulator activity	GO:0003712	2.79009e-07	6.55438	509	92	17	18679	DHX9,THRAP3,HNRNPU,TP53BP1,DPF2,KDM3B,NCOA5,PHF2,ARID1A,SF1,SNW1,SMARCC2,BCLAF1,LDB1,EWSR1,ARID1B,RNF20
GO:MF	mRNA 3'-UTR binding	GO:0003730	2.44384e-05	4.61193	192	92	10	18679	TARDBP,HNRNPR,HNRNPU,ELAVL1,HNRNPA0,HNRNPA2B1,ILF3,PUM2,HNRNPD,RNF20
GO:MF	transcription regulator activity	GO:0140110	5.24241e-05	4.28047	1916	92	28	18679	DHX9,THRAP3,HNRNPU,TP53BP1,NRF1,DPF2,CTCF,KDM3B,NCOA5,PHF2,ZNF740,ARID1A,ZBTB49,ZC3H4,SF1,TFCP2,ADNP,ZNF2,SNW1,ELF2,SMARCC2,PRDM2,BCLAF1,LDB1,EWSR1,ARID1B,RNF20,ZNF197
GO:MF	histone binding	GO:0042393	0.000197026	3.70548	240	92	10	18679	SART3,TP53BP1,DPF2,BRD2,KDM4A,PHF2,SMARCA5,TAF1,SMARCC2,RNF20
GO:MF	pre-mRNA binding	GO:0036002	0.000675346	3.17047	37	92	5	18679	TARDBP,HNRNPU,HNRNPA2B1,HNRNPL,SF1
GO:MF	mRNA 3'-UTR AU-rich region binding	GO:0035925	0.0043512	2.36139	25	92	4	18679	ELAVL1,HNRNPA0,ILF3,HNRNPD
GO:MF	sequence-specific DNA binding	GO:0043565	0.00967576	2.01432	1666	92	22	18679	UBTF,TARDBP,DHX9,THRAP3,SAFB,HNRNPU,TP53BP1,NRF1,RBMX,CTCF,HNRNPA2B1,ZNF740,SFPQ,HNRNPL,ZBTB49,HNRNPD,TAF1,TFCP2,ZNF2,ELF2,PRDM2,ZNF197
GO:MF	helicase activity	GO:0004386	0.0107616	1.96812	163	92	7	18679	DHX9,ERCC3,EP400,SMARCA5,SNRNP200,SMARCAL1,DDX50
GO:MF	pre-mRNA intronic binding	GO:0097157	0.016644	1.77874	12	92	3	18679	TARDBP,HNRNPA2B1,HNRNPL
GO:MF	single-stranded DNA binding	GO:0003697	0.0199536	1.69998	121	92	6	18679	DHX9,HNRNPU,FUBP1,HNRNPDL,HNRNPA2B1,FUBP3
GO:MF	methylated histone binding	GO:0035064	0.02024	1.69379	73	92	5	18679	TP53BP1,DPF2,KDM4A,PHF2,TAF1
GO:MF	methylation-dependent protein binding	GO:0140034	0.02024	1.69379	73	92	5	18679	TP53BP1,DPF2,KDM4A,PHF2,TAF1
GO:MF	protein binding	GO:0005515	0.0214756	1.66805	14767	92	87	18679	UBTF,TARDBP,KHDRBS1,YLPM1,HNRNPK,HNRNPR,DHX9,THRAP3,SART3,SAFB,HNRNPU,TP53BP1,ELAVL1,RSRC2,YTHDC1,NRF1,RBMX,FUBP1,DPF2,HNRNPDL,HNRNPA0,HNRNPM,BRD2,SCAF8,MFAP1,ERCC3,CTCF,SRSF1,HNRNPA2B1,ILF3,CPSF7,RANBP3,NCOA5,KDM4A,CPSF6,PHF2,ZNF740,ZMYM3,SFPQ,EP400,XRCC1,WDR82,ARID1A,STRIP1,ZMYM4,HNRNPL,LRRC47,PUM2,ZBTB49,FUBP3,IWS1,RBM15B,SMARCA5,SRSF10,POLDIP3,HNRNPD,FBXO11,WDR92,EDC3,SF1,SUDS3,TAF1,SETD2,TFC…
GO:MF	ATPase, acting on DNA	GO:0008094	0.0242991	1.61441	185	92	7	18679	DHX9,ERCC3,EP400,SMARCA5,SNRNP200,SMARCAL1,DDX50
GO:MF	histone demethylase activity (H3-K9 specific)	GO:0032454	0.0273421	1.56317	14	92	3	18679	KDM3B,KDM4A,PHF2
GO:MF	regulatory RNA binding	GO:0061980	0.0361139	1.44233	42	92	4	18679	DHX9,ELAVL1,HNRNPA2B1,PUM2
GO:BP	mRNA processing	GO:0006397	1.75431e-32	31.7559	532	91	39	18123	TARDBP,KHDRBS1,HNRNPK,HNRNPR,DHX9,THRAP3,SART3,SAFB,HNRNPU,ELAVL1,YTHDC1,RBMX,HNRNPA0,HNRNPM,SCAF8,MFAP1,ERCC3,SRSF1,HNRNPA2B1,CPSF7,CPSF6,PDCD7,SFPQ,HNRNPL,IWS1,RBM15B,SRSF10,POLDIP3,HNRNPD,SF1,PPP1R8,HNRNPUL1,HNRNPH3,SNRNP200,SNW1,HNRNPLL,SRSF3,BCLAF1,RNF20
GO:BP	RNA metabolic process	GO:0016070	2.07635e-28	27.6827	4714	91	77	18123	UBTF,TARDBP,KHDRBS1,HNRNPK,HNRNPR,DHX9,THRAP3,SART3,SAFB,HNRNPU,TP53BP1,ELAVL1,YTHDC1,NRF1,RBMX,FUBP1,DPF2,HNRNPDL,HNRNPA0,HNRNPM,BRD2,SCAF8,MFAP1,ERCC3,CTCF,SRSF1,HNRNPA2B1,ILF3,KDM3B,CPSF7,NCOA5,KDM4A,CPSF6,PHF2,ZNF740,PDCD7,SFPQ,ARID1A,EPC2,HNRNPL,PUM2,ZBTB49,FUBP3,IWS1,RBM15B,SMARCA5,ZC3H4,SRSF10,POLDIP3,HNRNPD,EDC3,SF1,SUDS3,TAF1,SETD2,TFCP2,PPP1R8,HNRNPUL1,HNRNPH3,ADNP,SNRNP200,ZNF2,SMARCAL…
GO:BP	mRNA metabolic process	GO:0016071	8.41829e-28	27.0748	880	91	42	18123	TARDBP,KHDRBS1,HNRNPK,HNRNPR,DHX9,THRAP3,SART3,SAFB,HNRNPU,ELAVL1,YTHDC1,RBMX,HNRNPA0,HNRNPM,SCAF8,MFAP1,ERCC3,SRSF1,HNRNPA2B1,CPSF7,CPSF6,PDCD7,SFPQ,HNRNPL,PUM2,IWS1,RBM15B,SRSF10,POLDIP3,HNRNPD,EDC3,SF1,TFCP2,PPP1R8,HNRNPUL1,HNRNPH3,SNRNP200,SNW1,HNRNPLL,SRSF3,BCLAF1,RNF20
GO:BP	nucleic acid metabolic process	GO:0090304	1.89431e-27	26.7225	5234	91	79	18123	UBTF,TARDBP,KHDRBS1,YLPM1,HNRNPK,HNRNPR,DHX9,THRAP3,SART3,SAFB,HNRNPU,TP53BP1,ELAVL1,YTHDC1,NRF1,RBMX,FUBP1,DPF2,HNRNPDL,HNRNPA0,HNRNPM,BRD2,SCAF8,MFAP1,ERCC3,CTCF,SRSF1,HNRNPA2B1,ILF3,KDM3B,CPSF7,NCOA5,KDM4A,CPSF6,PHF2,ZNF740,PDCD7,SFPQ,XRCC1,ARID1A,EPC2,HNRNPL,PUM2,ZBTB49,FUBP3,IWS1,RBM15B,SMARCA5,ZC3H4,SRSF10,POLDIP3,HNRNPD,EDC3,SF1,SUDS3,TAF1,SETD2,TFCP2,PPP1R8,HNRNPUL1,HNRNPH3,ADNP,SNRNP200,…
GO:BP	RNA splicing	GO:0008380	2.28173e-26	25.6417	459	91	33	18123	TARDBP,KHDRBS1,HNRNPK,HNRNPR,DHX9,THRAP3,SART3,HNRNPU,ELAVL1,YTHDC1,RBMX,HNRNPA0,HNRNPM,MFAP1,SRSF1,HNRNPA2B1,CPSF7,PDCD7,SFPQ,HNRNPL,IWS1,RBM15B,SRSF10,HNRNPD,SF1,PPP1R8,HNRNPUL1,HNRNPH3,SNRNP200,SNW1,HNRNPLL,SRSF3,BCLAF1
GO:BP	regulation of nucleobase-containing compound metabolic process	GO:0019219	1.42758e-24	23.8454	4123	91	70	18123	UBTF,TARDBP,KHDRBS1,YLPM1,HNRNPK,HNRNPR,DHX9,THRAP3,SAFB,HNRNPU,TP53BP1,ELAVL1,YTHDC1,NRF1,RBMX,FUBP1,DPF2,HNRNPA0,HNRNPM,BRD2,SCAF8,CTCF,SRSF1,HNRNPA2B1,ILF3,KDM3B,CPSF7,NCOA5,KDM4A,CPSF6,PHF2,ZNF740,SFPQ,XRCC1,ARID1A,EPC2,HNRNPL,PUM2,ZBTB49,FUBP3,IWS1,RBM15B,SMARCA5,ZC3H4,SRSF10,HNRNPD,EDC3,SF1,SUDS3,TAF1,SETD2,TFCP2,HNRNPH3,ADNP,ZNF2,SMARCAL1,SNW1,ELF2,HNRNPLL,SMARCC2,SRSF3,PRDM2,BCLAF1,LDB1,E…
GO:BP	nucleobase-containing compound metabolic process	GO:0006139	2.13151e-24	23.6713	5752	91	79	18123	UBTF,TARDBP,KHDRBS1,YLPM1,HNRNPK,HNRNPR,DHX9,THRAP3,SART3,SAFB,HNRNPU,TP53BP1,ELAVL1,YTHDC1,NRF1,RBMX,FUBP1,DPF2,HNRNPDL,HNRNPA0,HNRNPM,BRD2,SCAF8,MFAP1,ERCC3,CTCF,SRSF1,HNRNPA2B1,ILF3,KDM3B,CPSF7,NCOA5,KDM4A,CPSF6,PHF2,ZNF740,PDCD7,SFPQ,XRCC1,ARID1A,EPC2,HNRNPL,PUM2,ZBTB49,FUBP3,IWS1,RBM15B,SMARCA5,ZC3H4,SRSF10,POLDIP3,HNRNPD,EDC3,SF1,SUDS3,TAF1,SETD2,TFCP2,PPP1R8,HNRNPUL1,HNRNPH3,ADNP,SNRNP200,…
GO:BP	regulation of RNA metabolic process	GO:0051252	2.19906e-24	23.6578	3847	91	68	18123	UBTF,TARDBP,KHDRBS1,HNRNPK,HNRNPR,DHX9,THRAP3,SAFB,HNRNPU,TP53BP1,ELAVL1,YTHDC1,NRF1,RBMX,FUBP1,DPF2,HNRNPA0,HNRNPM,BRD2,SCAF8,CTCF,SRSF1,HNRNPA2B1,ILF3,KDM3B,CPSF7,NCOA5,KDM4A,CPSF6,PHF2,ZNF740,SFPQ,ARID1A,EPC2,HNRNPL,PUM2,ZBTB49,FUBP3,IWS1,RBM15B,SMARCA5,ZC3H4,SRSF10,HNRNPD,EDC3,SF1,SUDS3,TAF1,SETD2,TFCP2,HNRNPH3,ADNP,ZNF2,SMARCAL1,SNW1,ELF2,HNRNPLL,SMARCC2,SRSF3,PRDM2,BCLAF1,LDB1,EWSR1,ARID1B,…
GO:BP	RNA processing	GO:0006396	3.22939e-24	23.4909	1010	91	41	18123	TARDBP,KHDRBS1,HNRNPK,HNRNPR,DHX9,THRAP3,SART3,SAFB,HNRNPU,ELAVL1,YTHDC1,RBMX,HNRNPDL,HNRNPA0,HNRNPM,SCAF8,MFAP1,ERCC3,SRSF1,HNRNPA2B1,CPSF7,CPSF6,PDCD7,SFPQ,HNRNPL,PUM2,IWS1,RBM15B,SRSF10,POLDIP3,HNRNPD,SF1,PPP1R8,HNRNPUL1,HNRNPH3,SNRNP200,SNW1,HNRNPLL,SRSF3,BCLAF1,RNF20
GO:BP	heterocycle metabolic process	GO:0046483	2.00384e-23	22.6981	5929	91	79	18123	UBTF,TARDBP,KHDRBS1,YLPM1,HNRNPK,HNRNPR,DHX9,THRAP3,SART3,SAFB,HNRNPU,TP53BP1,ELAVL1,YTHDC1,NRF1,RBMX,FUBP1,DPF2,HNRNPDL,HNRNPA0,HNRNPM,BRD2,SCAF8,MFAP1,ERCC3,CTCF,SRSF1,HNRNPA2B1,ILF3,KDM3B,CPSF7,NCOA5,KDM4A,CPSF6,PHF2,ZNF740,PDCD7,SFPQ,XRCC1,ARID1A,EPC2,HNRNPL,PUM2,ZBTB49,FUBP3,IWS1,RBM15B,SMARCA5,ZC3H4,SRSF10,POLDIP3,HNRNPD,EDC3,SF1,SUDS3,TAF1,SETD2,TFCP2,PPP1R8,HNRNPUL1,HNRNPH3,ADNP,SNRNP200,…
GO:BP	cellular aromatic compound metabolic process	GO:0006725	3.45731e-23	22.4613	5973	91	79	18123	UBTF,TARDBP,KHDRBS1,YLPM1,HNRNPK,HNRNPR,DHX9,THRAP3,SART3,SAFB,HNRNPU,TP53BP1,ELAVL1,YTHDC1,NRF1,RBMX,FUBP1,DPF2,HNRNPDL,HNRNPA0,HNRNPM,BRD2,SCAF8,MFAP1,ERCC3,CTCF,SRSF1,HNRNPA2B1,ILF3,KDM3B,CPSF7,NCOA5,KDM4A,CPSF6,PHF2,ZNF740,PDCD7,SFPQ,XRCC1,ARID1A,EPC2,HNRNPL,PUM2,ZBTB49,FUBP3,IWS1,RBM15B,SMARCA5,ZC3H4,SRSF10,POLDIP3,HNRNPD,EDC3,SF1,SUDS3,TAF1,SETD2,TFCP2,PPP1R8,HNRNPUL1,HNRNPH3,ADNP,SNRNP200,…
GO:BP	RNA splicing, via transesterification reactions with bulged adenosine as nucleophile	GO:0000377	1.11717e-22	21.9519	360	91	28	18123	KHDRBS1,HNRNPK,HNRNPR,DHX9,THRAP3,SART3,HNRNPU,ELAVL1,YTHDC1,RBMX,HNRNPA0,HNRNPM,MFAP1,SRSF1,HNRNPA2B1,CPSF7,PDCD7,SFPQ,HNRNPL,RBM15B,SRSF10,HNRNPD,SF1,HNRNPUL1,HNRNPH3,SNRNP200,SNW1,SRSF3
GO:BP	mRNA splicing, via spliceosome	GO:0000398	1.11717e-22	21.9519	360	91	28	18123	KHDRBS1,HNRNPK,HNRNPR,DHX9,THRAP3,SART3,HNRNPU,ELAVL1,YTHDC1,RBMX,HNRNPA0,HNRNPM,MFAP1,SRSF1,HNRNPA2B1,CPSF7,PDCD7,SFPQ,HNRNPL,RBM15B,SRSF10,HNRNPD,SF1,HNRNPUL1,HNRNPH3,SNRNP200,SNW1,SRSF3
GO:BP	RNA splicing, via transesterification reactions	GO:0000375	1.40782e-22	21.8515	363	91	28	18123	KHDRBS1,HNRNPK,HNRNPR,DHX9,THRAP3,SART3,HNRNPU,ELAVL1,YTHDC1,RBMX,HNRNPA0,HNRNPM,MFAP1,SRSF1,HNRNPA2B1,CPSF7,PDCD7,SFPQ,HNRNPL,RBM15B,SRSF10,HNRNPD,SF1,HNRNPUL1,HNRNPH3,SNRNP200,SNW1,SRSF3
GO:BP	organic cyclic compound metabolic process	GO:1901360	7.39305e-22	21.1312	6227	91	79	18123	UBTF,TARDBP,KHDRBS1,YLPM1,HNRNPK,HNRNPR,DHX9,THRAP3,SART3,SAFB,HNRNPU,TP53BP1,ELAVL1,YTHDC1,NRF1,RBMX,FUBP1,DPF2,HNRNPDL,HNRNPA0,HNRNPM,BRD2,SCAF8,MFAP1,ERCC3,CTCF,SRSF1,HNRNPA2B1,ILF3,KDM3B,CPSF7,NCOA5,KDM4A,CPSF6,PHF2,ZNF740,PDCD7,SFPQ,XRCC1,ARID1A,EPC2,HNRNPL,PUM2,ZBTB49,FUBP3,IWS1,RBM15B,SMARCA5,ZC3H4,SRSF10,POLDIP3,HNRNPD,EDC3,SF1,SUDS3,TAF1,SETD2,TFCP2,PPP1R8,HNRNPUL1,HNRNPH3,ADNP,SNRNP200,…
GO:BP	regulation of mRNA metabolic process	GO:1903311	1.45881e-20	19.836	384	91	27	18123	TARDBP,KHDRBS1,HNRNPK,HNRNPR,DHX9,THRAP3,SAFB,HNRNPU,ELAVL1,YTHDC1,RBMX,HNRNPA0,HNRNPM,HNRNPA2B1,CPSF7,CPSF6,HNRNPL,PUM2,IWS1,RBM15B,SRSF10,HNRNPD,EDC3,SF1,SNW1,SRSF3,RNF20
GO:BP	cellular nitrogen compound metabolic process	GO:0034641	3.97389e-20	19.4008	6576	91	79	18123	UBTF,TARDBP,KHDRBS1,YLPM1,HNRNPK,HNRNPR,DHX9,THRAP3,SART3,SAFB,HNRNPU,TP53BP1,ELAVL1,YTHDC1,NRF1,RBMX,FUBP1,DPF2,HNRNPDL,HNRNPA0,HNRNPM,BRD2,SCAF8,MFAP1,ERCC3,CTCF,SRSF1,HNRNPA2B1,ILF3,KDM3B,CPSF7,NCOA5,KDM4A,CPSF6,PHF2,ZNF740,PDCD7,SFPQ,XRCC1,ARID1A,EPC2,HNRNPL,PUM2,ZBTB49,FUBP3,IWS1,RBM15B,SMARCA5,ZC3H4,SRSF10,POLDIP3,HNRNPD,EDC3,SF1,SUDS3,TAF1,SETD2,TFCP2,PPP1R8,HNRNPUL1,HNRNPH3,ADNP,SNRNP200,…
GO:BP	gene expression	GO:0010467	6.39299e-20	19.1943	6192	91	77	18123	UBTF,TARDBP,KHDRBS1,HNRNPK,HNRNPR,DHX9,THRAP3,SART3,SAFB,HNRNPU,TP53BP1,ELAVL1,YTHDC1,NRF1,RBMX,FUBP1,DPF2,HNRNPDL,HNRNPA0,HNRNPM,BRD2,SCAF8,MFAP1,ERCC3,CTCF,SRSF1,HNRNPA2B1,ILF3,KDM3B,CPSF7,NCOA5,KDM4A,CPSF6,PHF2,ZNF740,PDCD7,SFPQ,ARID1A,EPC2,HNRNPL,PUM2,ZBTB49,FUBP3,IWS1,RBM15B,SMARCA5,ZC3H4,SRSF10,POLDIP3,HNRNPD,EDC3,SF1,SUDS3,TAF1,SETD2,TFCP2,PPP1R8,HNRNPUL1,HNRNPH3,ADNP,SNRNP200,ZNF2,SMARCAL…
GO:BP	regulation of mRNA processing	GO:0050684	9.56062e-19	18.0195	145	91	19	18123	KHDRBS1,HNRNPK,DHX9,THRAP3,SAFB,HNRNPU,YTHDC1,RBMX,HNRNPA2B1,CPSF7,CPSF6,HNRNPL,IWS1,RBM15B,SRSF10,SF1,SNW1,SRSF3,RNF20
GO:BP	regulation of nitrogen compound metabolic process	GO:0051171	1.59405e-17	16.7975	5886	91	73	18123	UBTF,TARDBP,KHDRBS1,YLPM1,HNRNPK,HNRNPR,DHX9,THRAP3,SART3,SAFB,HNRNPU,TP53BP1,ELAVL1,YTHDC1,NRF1,RBMX,FUBP1,DPF2,HNRNPA0,HNRNPM,BRD2,SCAF8,CTCF,SRSF1,HNRNPA2B1,ILF3,KDM3B,CPSF7,NCOA5,KDM4A,CPSF6,PHF2,ZNF740,SFPQ,XRCC1,ARID1A,EPC2,HNRNPL,PUM2,ZBTB49,FUBP3,IWS1,RBM15B,SMARCA5,ZC3H4,SRSF10,POLDIP3,HNRNPD,EDC3,SF1,SUDS3,TAF1,SETD2,TFCP2,PPP1R8,HNRNPH3,ADNP,ZNF2,SMARCAL1,SNW1,ELF2,HNRNPLL,SMARCC2,SRSF…
GO:BP	regulation of primary metabolic process	GO:0080090	1.18324e-16	15.9269	6071	91	73	18123	UBTF,TARDBP,KHDRBS1,YLPM1,HNRNPK,HNRNPR,DHX9,THRAP3,SART3,SAFB,HNRNPU,TP53BP1,ELAVL1,YTHDC1,NRF1,RBMX,FUBP1,DPF2,HNRNPA0,HNRNPM,BRD2,SCAF8,CTCF,SRSF1,HNRNPA2B1,ILF3,KDM3B,CPSF7,NCOA5,KDM4A,CPSF6,PHF2,ZNF740,SFPQ,XRCC1,ARID1A,EPC2,HNRNPL,PUM2,ZBTB49,FUBP3,IWS1,RBM15B,SMARCA5,ZC3H4,SRSF10,POLDIP3,HNRNPD,EDC3,SF1,SUDS3,TAF1,SETD2,TFCP2,PPP1R8,HNRNPH3,ADNP,ZNF2,SMARCAL1,SNW1,ELF2,HNRNPLL,SMARCC2,SRSF…
GO:BP	regulation of gene expression	GO:0010468	2.65898e-16	15.5753	5218	91	68	18123	UBTF,TARDBP,KHDRBS1,HNRNPK,HNRNPR,DHX9,THRAP3,SART3,SAFB,HNRNPU,TP53BP1,ELAVL1,YTHDC1,NRF1,RBMX,FUBP1,DPF2,HNRNPDL,HNRNPA0,HNRNPM,BRD2,SCAF8,CTCF,SRSF1,HNRNPA2B1,ILF3,KDM3B,NCOA5,KDM4A,PHF2,ZNF740,SFPQ,ARID1A,EPC2,HNRNPL,PUM2,ZBTB49,FUBP3,RBM15B,SMARCA5,ZC3H4,SRSF10,POLDIP3,HNRNPD,EDC3,SF1,SUDS3,TAF1,SETD2,TFCP2,HNRNPH3,ADNP,ZNF2,SMARCAL1,SNW1,ELF2,HNRNPLL,SMARCC2,SRSF3,PRDM2,BCLAF1,LDB1,EWSR1,AR…
GO:BP	regulation of cellular metabolic process	GO:0031323	1.40244e-15	14.8531	6309	91	73	18123	UBTF,TARDBP,KHDRBS1,YLPM1,HNRNPK,HNRNPR,DHX9,THRAP3,SART3,SAFB,HNRNPU,TP53BP1,ELAVL1,YTHDC1,NRF1,RBMX,FUBP1,DPF2,HNRNPA0,HNRNPM,BRD2,SCAF8,CTCF,SRSF1,HNRNPA2B1,ILF3,KDM3B,CPSF7,NCOA5,KDM4A,CPSF6,PHF2,ZNF740,SFPQ,XRCC1,ARID1A,EPC2,HNRNPL,PUM2,ZBTB49,FUBP3,IWS1,RBM15B,SMARCA5,ZC3H4,SRSF10,POLDIP3,HNRNPD,EDC3,SF1,SUDS3,TAF1,SETD2,TFCP2,PPP1R8,HNRNPH3,ADNP,ZNF2,SMARCAL1,SNW1,ELF2,HNRNPLL,SMARCC2,SRSF…
GO:BP	regulation of macromolecule metabolic process	GO:0060255	4.19704e-15	14.3771	6622	91	74	18123	UBTF,TARDBP,KHDRBS1,YLPM1,HNRNPK,HNRNPR,DHX9,THRAP3,SART3,SAFB,HNRNPU,TP53BP1,ELAVL1,YTHDC1,NRF1,RBMX,FUBP1,DPF2,HNRNPDL,HNRNPA0,HNRNPM,BRD2,SCAF8,CTCF,SRSF1,HNRNPA2B1,ILF3,KDM3B,CPSF7,NCOA5,KDM4A,CPSF6,PHF2,ZNF740,SFPQ,XRCC1,ARID1A,EPC2,HNRNPL,PUM2,ZBTB49,FUBP3,IWS1,RBM15B,SMARCA5,ZC3H4,SRSF10,POLDIP3,HNRNPD,EDC3,SF1,SUDS3,TAF1,SETD2,TFCP2,PPP1R8,HNRNPH3,ADNP,ZNF2,SMARCAL1,SNW1,ELF2,HNRNPLL,SMAR…
GO:BP	regulation of RNA splicing	GO:0043484	8.1473e-14	13.089	152	91	16	18123	KHDRBS1,HNRNPK,THRAP3,HNRNPU,YTHDC1,RBMX,SRSF1,HNRNPA2B1,HNRNPL,RBM15B,SRSF10,SF1,HNRNPH3,SNW1,HNRNPLL,SRSF3
GO:BP	regulation of cellular macromolecule biosynthetic process	GO:2000112	5.98971e-13	12.2226	4102	91	57	18123	UBTF,TARDBP,KHDRBS1,HNRNPK,HNRNPR,DHX9,THRAP3,SAFB,HNRNPU,TP53BP1,ELAVL1,NRF1,RBMX,FUBP1,DPF2,BRD2,SCAF8,CTCF,HNRNPA2B1,ILF3,KDM3B,NCOA5,KDM4A,PHF2,ZNF740,SFPQ,ARID1A,EPC2,PUM2,ZBTB49,FUBP3,SMARCA5,ZC3H4,SRSF10,POLDIP3,HNRNPD,EDC3,SF1,SUDS3,TAF1,SETD2,TFCP2,ADNP,ZNF2,SMARCAL1,SNW1,ELF2,SMARCC2,PRDM2,BCLAF1,LDB1,EWSR1,ARID1B,GPBP1,RNF20,ZNF197,QRICH1
GO:BP	regulation of metabolic process	GO:0019222	7.22912e-13	12.1409	7175	91	74	18123	UBTF,TARDBP,KHDRBS1,YLPM1,HNRNPK,HNRNPR,DHX9,THRAP3,SART3,SAFB,HNRNPU,TP53BP1,ELAVL1,YTHDC1,NRF1,RBMX,FUBP1,DPF2,HNRNPDL,HNRNPA0,HNRNPM,BRD2,SCAF8,CTCF,SRSF1,HNRNPA2B1,ILF3,KDM3B,CPSF7,NCOA5,KDM4A,CPSF6,PHF2,ZNF740,SFPQ,XRCC1,ARID1A,EPC2,HNRNPL,PUM2,ZBTB49,FUBP3,IWS1,RBM15B,SMARCA5,ZC3H4,SRSF10,POLDIP3,HNRNPD,EDC3,SF1,SUDS3,TAF1,SETD2,TFCP2,PPP1R8,HNRNPH3,ADNP,ZNF2,SMARCAL1,SNW1,ELF2,HNRNPLL,SMAR…
GO:BP	regulation of macromolecule biosynthetic process	GO:0010556	8.67359e-13	12.0618	4134	91	57	18123	UBTF,TARDBP,KHDRBS1,HNRNPK,HNRNPR,DHX9,THRAP3,SAFB,HNRNPU,TP53BP1,ELAVL1,NRF1,RBMX,FUBP1,DPF2,BRD2,SCAF8,CTCF,HNRNPA2B1,ILF3,KDM3B,NCOA5,KDM4A,PHF2,ZNF740,SFPQ,ARID1A,EPC2,PUM2,ZBTB49,FUBP3,SMARCA5,ZC3H4,SRSF10,POLDIP3,HNRNPD,EDC3,SF1,SUDS3,TAF1,SETD2,TFCP2,ADNP,ZNF2,SMARCAL1,SNW1,ELF2,SMARCC2,PRDM2,BCLAF1,LDB1,EWSR1,ARID1B,GPBP1,RNF20,ZNF197,QRICH1
GO:BP	transcription, DNA-templated	GO:0006351	1.14161e-12	11.9425	3713	91	54	18123	UBTF,KHDRBS1,HNRNPK,DHX9,THRAP3,SAFB,HNRNPU,TP53BP1,NRF1,RBMX,FUBP1,DPF2,BRD2,SCAF8,ERCC3,CTCF,HNRNPA2B1,ILF3,KDM3B,CPSF7,NCOA5,KDM4A,PHF2,ZNF740,SFPQ,ARID1A,EPC2,ZBTB49,FUBP3,IWS1,SMARCA5,ZC3H4,SRSF10,HNRNPD,SF1,SUDS3,TAF1,SETD2,TFCP2,ADNP,ZNF2,SMARCAL1,SNW1,ELF2,SMARCC2,PRDM2,BCLAF1,LDB1,EWSR1,ARID1B,GPBP1,RNF20,ZNF197,QRICH1
GO:BP	nucleic acid-templated transcription	GO:0097659	1.16967e-12	11.9319	3715	91	54	18123	UBTF,KHDRBS1,HNRNPK,DHX9,THRAP3,SAFB,HNRNPU,TP53BP1,NRF1,RBMX,FUBP1,DPF2,BRD2,SCAF8,ERCC3,CTCF,HNRNPA2B1,ILF3,KDM3B,CPSF7,NCOA5,KDM4A,PHF2,ZNF740,SFPQ,ARID1A,EPC2,ZBTB49,FUBP3,IWS1,SMARCA5,ZC3H4,SRSF10,HNRNPD,SF1,SUDS3,TAF1,SETD2,TFCP2,ADNP,ZNF2,SMARCAL1,SNW1,ELF2,SMARCC2,PRDM2,BCLAF1,LDB1,EWSR1,ARID1B,GPBP1,RNF20,ZNF197,QRICH1
GO:BP	chromosome organization	GO:0051276	1.34106e-12	11.8726	1270	91	33	18123	YLPM1,DHX9,SART3,SAFB,HNRNPU,DPF2,BRD2,ERCC3,CTCF,HNRNPA2B1,KDM3B,KDM4A,PHF2,SFPQ,EP400,XRCC1,WDR82,ARID1A,EPC2,IWS1,SMARCA5,HNRNPD,SUDS3,TAF1,SETD2,SMARCAL1,SNW1,SENP6,SMARCC2,PRDM2,LDB1,ARID1B,RNF20
GO:BP	RNA biosynthetic process	GO:0032774	1.41965e-12	11.8478	3731	91	54	18123	UBTF,KHDRBS1,HNRNPK,DHX9,THRAP3,SAFB,HNRNPU,TP53BP1,NRF1,RBMX,FUBP1,DPF2,BRD2,SCAF8,ERCC3,CTCF,HNRNPA2B1,ILF3,KDM3B,CPSF7,NCOA5,KDM4A,PHF2,ZNF740,SFPQ,ARID1A,EPC2,ZBTB49,FUBP3,IWS1,SMARCA5,ZC3H4,SRSF10,HNRNPD,SF1,SUDS3,TAF1,SETD2,TFCP2,ADNP,ZNF2,SMARCAL1,SNW1,ELF2,SMARCC2,PRDM2,BCLAF1,LDB1,EWSR1,ARID1B,GPBP1,RNF20,ZNF197,QRICH1
GO:BP	macromolecule metabolic process	GO:0043170	4.2305e-12	11.3736	9867	91	84	18123	UBTF,TARDBP,KHDRBS1,YLPM1,HNRNPK,HNRNPR,DHX9,THRAP3,SART3,SAFB,HNRNPU,TP53BP1,ELAVL1,YTHDC1,NRF1,RBMX,FUBP1,DPF2,HNRNPDL,HNRNPA0,HNRNPM,BRD2,SCAF8,MFAP1,ERCC3,CTCF,SRSF1,HNRNPA2B1,ILF3,KDM3B,CPSF7,NCOA5,KDM4A,CPSF6,PHF2,ZNF740,PDCD7,SFPQ,EP400,XRCC1,WDR82,ARID1A,EPC2,HNRNPL,PUM2,ZBTB49,FUBP3,IWS1,RBM15B,SMARCA5,ZC3H4,SRSF10,POLDIP3,HNRNPD,FBXO11,EDC3,SF1,SUDS3,TAF1,SETD2,TFCP2,PPP1R8,HNRNPUL1,HNR…
GO:BP	regulation of cellular biosynthetic process	GO:0031326	6.03637e-12	11.2192	4307	91	57	18123	UBTF,TARDBP,KHDRBS1,HNRNPK,HNRNPR,DHX9,THRAP3,SAFB,HNRNPU,TP53BP1,ELAVL1,NRF1,RBMX,FUBP1,DPF2,BRD2,SCAF8,CTCF,HNRNPA2B1,ILF3,KDM3B,NCOA5,KDM4A,PHF2,ZNF740,SFPQ,ARID1A,EPC2,PUM2,ZBTB49,FUBP3,SMARCA5,ZC3H4,SRSF10,POLDIP3,HNRNPD,EDC3,SF1,SUDS3,TAF1,SETD2,TFCP2,ADNP,ZNF2,SMARCAL1,SNW1,ELF2,SMARCC2,PRDM2,BCLAF1,LDB1,EWSR1,ARID1B,GPBP1,RNF20,ZNF197,QRICH1
GO:BP	regulation of biosynthetic process	GO:0009889	1.24584e-11	10.9045	4374	91	57	18123	UBTF,TARDBP,KHDRBS1,HNRNPK,HNRNPR,DHX9,THRAP3,SAFB,HNRNPU,TP53BP1,ELAVL1,NRF1,RBMX,FUBP1,DPF2,BRD2,SCAF8,CTCF,HNRNPA2B1,ILF3,KDM3B,NCOA5,KDM4A,PHF2,ZNF740,SFPQ,ARID1A,EPC2,PUM2,ZBTB49,FUBP3,SMARCA5,ZC3H4,SRSF10,POLDIP3,HNRNPD,EDC3,SF1,SUDS3,TAF1,SETD2,TFCP2,ADNP,ZNF2,SMARCAL1,SNW1,ELF2,SMARCC2,PRDM2,BCLAF1,LDB1,EWSR1,ARID1B,GPBP1,RNF20,ZNF197,QRICH1
GO:BP	regulation of mRNA splicing, via spliceosome	GO:0048024	1.30937e-11	10.8829	107	91	13	18123	KHDRBS1,HNRNPK,THRAP3,HNRNPU,YTHDC1,RBMX,HNRNPA2B1,HNRNPL,RBM15B,SRSF10,SF1,SNW1,SRSF3
GO:BP	regulation of transcription, DNA-templated	GO:0006355	2.28275e-11	10.6415	3534	91	51	18123	UBTF,KHDRBS1,HNRNPK,DHX9,THRAP3,SAFB,HNRNPU,TP53BP1,NRF1,RBMX,FUBP1,DPF2,BRD2,SCAF8,CTCF,HNRNPA2B1,ILF3,KDM3B,NCOA5,KDM4A,PHF2,ZNF740,SFPQ,ARID1A,EPC2,ZBTB49,FUBP3,SMARCA5,ZC3H4,SRSF10,HNRNPD,SF1,SUDS3,TAF1,SETD2,TFCP2,ADNP,ZNF2,SMARCAL1,SNW1,ELF2,SMARCC2,PRDM2,BCLAF1,LDB1,EWSR1,ARID1B,GPBP1,RNF20,ZNF197,QRICH1
GO:BP	regulation of nucleic acid-templated transcription	GO:1903506	2.33756e-11	10.6312	3536	91	51	18123	UBTF,KHDRBS1,HNRNPK,DHX9,THRAP3,SAFB,HNRNPU,TP53BP1,NRF1,RBMX,FUBP1,DPF2,BRD2,SCAF8,CTCF,HNRNPA2B1,ILF3,KDM3B,NCOA5,KDM4A,PHF2,ZNF740,SFPQ,ARID1A,EPC2,ZBTB49,FUBP3,SMARCA5,ZC3H4,SRSF10,HNRNPD,SF1,SUDS3,TAF1,SETD2,TFCP2,ADNP,ZNF2,SMARCAL1,SNW1,ELF2,SMARCC2,PRDM2,BCLAF1,LDB1,EWSR1,ARID1B,GPBP1,RNF20,ZNF197,QRICH1
GO:BP	regulation of RNA biosynthetic process	GO:2001141	2.48022e-11	10.6055	3541	91	51	18123	UBTF,KHDRBS1,HNRNPK,DHX9,THRAP3,SAFB,HNRNPU,TP53BP1,NRF1,RBMX,FUBP1,DPF2,BRD2,SCAF8,CTCF,HNRNPA2B1,ILF3,KDM3B,NCOA5,KDM4A,PHF2,ZNF740,SFPQ,ARID1A,EPC2,ZBTB49,FUBP3,SMARCA5,ZC3H4,SRSF10,HNRNPD,SF1,SUDS3,TAF1,SETD2,TFCP2,ADNP,ZNF2,SMARCAL1,SNW1,ELF2,SMARCC2,PRDM2,BCLAF1,LDB1,EWSR1,ARID1B,GPBP1,RNF20,ZNF197,QRICH1
GO:BP	nitrogen compound metabolic process	GO:0006807	3.57039e-11	10.4473	10148	91	84	18123	UBTF,TARDBP,KHDRBS1,YLPM1,HNRNPK,HNRNPR,DHX9,THRAP3,SART3,SAFB,HNRNPU,TP53BP1,ELAVL1,YTHDC1,NRF1,RBMX,FUBP1,DPF2,HNRNPDL,HNRNPA0,HNRNPM,BRD2,SCAF8,MFAP1,ERCC3,CTCF,SRSF1,HNRNPA2B1,ILF3,KDM3B,CPSF7,NCOA5,KDM4A,CPSF6,PHF2,ZNF740,PDCD7,SFPQ,EP400,XRCC1,WDR82,ARID1A,EPC2,HNRNPL,PUM2,ZBTB49,FUBP3,IWS1,RBM15B,SMARCA5,ZC3H4,SRSF10,POLDIP3,HNRNPD,FBXO11,EDC3,SF1,SUDS3,TAF1,SETD2,TFCP2,PPP1R8,HNRNPUL1,HNR…
GO:BP	positive regulation of nucleobase-containing compound metabolic process	GO:0045935	3.97994e-11	10.4001	1943	91	38	18123	UBTF,TARDBP,HNRNPK,HNRNPR,DHX9,THRAP3,HNRNPU,TP53BP1,NRF1,RBMX,DPF2,SCAF8,CTCF,SRSF1,HNRNPA2B1,ILF3,PHF2,SFPQ,XRCC1,ARID1A,ZBTB49,FUBP3,SMARCA5,HNRNPD,EDC3,TFCP2,SNW1,ELF2,HNRNPLL,SMARCC2,PRDM2,BCLAF1,LDB1,ARID1B,GPBP1,RNF20,ZNF197,QRICH1
GO:BP	cellular nitrogen compound biosynthetic process	GO:0044271	8.75922e-11	10.0575	5054	91	60	18123	UBTF,TARDBP,KHDRBS1,HNRNPK,HNRNPR,DHX9,THRAP3,SAFB,HNRNPU,TP53BP1,ELAVL1,NRF1,RBMX,FUBP1,DPF2,BRD2,SCAF8,ERCC3,CTCF,HNRNPA2B1,ILF3,KDM3B,CPSF7,NCOA5,KDM4A,PHF2,ZNF740,SFPQ,ARID1A,EPC2,PUM2,ZBTB49,FUBP3,IWS1,SMARCA5,ZC3H4,SRSF10,POLDIP3,HNRNPD,EDC3,SF1,SUDS3,TAF1,SETD2,TFCP2,ADNP,ZNF2,SMARCAL1,SNW1,ELF2,SMARCC2,PRDM2,BCLAF1,LDB1,EWSR1,ARID1B,GPBP1,RNF20,ZNF197,QRICH1
GO:BP	positive regulation of RNA metabolic process	GO:0051254	8.8822e-11	10.0515	1775	91	36	18123	UBTF,TARDBP,HNRNPK,HNRNPR,DHX9,THRAP3,HNRNPU,TP53BP1,NRF1,RBMX,DPF2,SCAF8,CTCF,SRSF1,ILF3,PHF2,SFPQ,ARID1A,ZBTB49,FUBP3,SMARCA5,HNRNPD,EDC3,TFCP2,SNW1,ELF2,HNRNPLL,SMARCC2,PRDM2,BCLAF1,LDB1,ARID1B,GPBP1,RNF20,ZNF197,QRICH1
GO:BP	negative regulation of nucleobase-containing compound metabolic process	GO:0045934	9.00603e-11	10.0455	1569	91	34	18123	TARDBP,KHDRBS1,HNRNPK,DHX9,THRAP3,HNRNPU,TP53BP1,ELAVL1,RBMX,DPF2,HNRNPA0,SCAF8,CTCF,HNRNPA2B1,ILF3,NCOA5,KDM4A,PHF2,SFPQ,XRCC1,ZBTB49,SMARCA5,SRSF10,HNRNPD,SF1,SUDS3,TAF1,SNW1,ELF2,SMARCC2,PRDM2,BCLAF1,LDB1,RNF20
GO:BP	negative regulation of mRNA metabolic process	GO:1903312	9.44617e-11	10.0247	95	91	12	18123	TARDBP,HNRNPK,DHX9,THRAP3,HNRNPU,ELAVL1,RBMX,HNRNPA0,HNRNPA2B1,SRSF10,HNRNPD,RNF20
GO:BP	cellular macromolecule biosynthetic process	GO:0034645	1.13503e-10	9.94499	5081	91	60	18123	UBTF,TARDBP,KHDRBS1,HNRNPK,HNRNPR,DHX9,THRAP3,SAFB,HNRNPU,TP53BP1,ELAVL1,NRF1,RBMX,FUBP1,DPF2,BRD2,SCAF8,ERCC3,CTCF,HNRNPA2B1,ILF3,KDM3B,CPSF7,NCOA5,KDM4A,PHF2,ZNF740,SFPQ,ARID1A,EPC2,PUM2,ZBTB49,FUBP3,IWS1,SMARCA5,ZC3H4,SRSF10,POLDIP3,HNRNPD,EDC3,SF1,SUDS3,TAF1,SETD2,TFCP2,ADNP,ZNF2,SMARCAL1,SNW1,ELF2,SMARCC2,PRDM2,BCLAF1,LDB1,EWSR1,ARID1B,GPBP1,RNF20,ZNF197,QRICH1
GO:BP	transcription by RNA polymerase II	GO:0006366	1.22635e-10	9.91138	2729	91	44	18123	KHDRBS1,HNRNPK,DHX9,THRAP3,SAFB,HNRNPU,TP53BP1,NRF1,RBMX,DPF2,BRD2,SCAF8,ERCC3,CTCF,HNRNPA2B1,KDM3B,CPSF7,NCOA5,PHF2,ZNF740,SFPQ,ARID1A,EPC2,ZBTB49,FUBP3,IWS1,SMARCA5,ZC3H4,HNRNPD,SUDS3,TAF1,SETD2,TFCP2,ADNP,ZNF2,SMARCAL1,SNW1,ELF2,SMARCC2,PRDM2,BCLAF1,LDB1,ARID1B,ZNF197
GO:BP	macromolecule biosynthetic process	GO:0009059	2.08258e-10	9.6814	5145	91	60	18123	UBTF,TARDBP,KHDRBS1,HNRNPK,HNRNPR,DHX9,THRAP3,SAFB,HNRNPU,TP53BP1,ELAVL1,NRF1,RBMX,FUBP1,DPF2,BRD2,SCAF8,ERCC3,CTCF,HNRNPA2B1,ILF3,KDM3B,CPSF7,NCOA5,KDM4A,PHF2,ZNF740,SFPQ,ARID1A,EPC2,PUM2,ZBTB49,FUBP3,IWS1,SMARCA5,ZC3H4,SRSF10,POLDIP3,HNRNPD,EDC3,SF1,SUDS3,TAF1,SETD2,TFCP2,ADNP,ZNF2,SMARCAL1,SNW1,ELF2,SMARCC2,PRDM2,BCLAF1,LDB1,EWSR1,ARID1B,GPBP1,RNF20,ZNF197,QRICH1
GO:BP	alternative mRNA splicing, via spliceosome	GO:0000380	2.40656e-10	9.6186	76	91	11	18123	KHDRBS1,DHX9,THRAP3,HNRNPU,YTHDC1,RBMX,HNRNPM,SRSF1,SFPQ,HNRNPL,RBM15B
GO:BP	nucleobase-containing compound biosynthetic process	GO:0034654	2.74579e-10	9.56133	4202	91	54	18123	UBTF,KHDRBS1,HNRNPK,DHX9,THRAP3,SAFB,HNRNPU,TP53BP1,NRF1,RBMX,FUBP1,DPF2,BRD2,SCAF8,ERCC3,CTCF,HNRNPA2B1,ILF3,KDM3B,CPSF7,NCOA5,KDM4A,PHF2,ZNF740,SFPQ,ARID1A,EPC2,ZBTB49,FUBP3,IWS1,SMARCA5,ZC3H4,SRSF10,HNRNPD,SF1,SUDS3,TAF1,SETD2,TFCP2,ADNP,ZNF2,SMARCAL1,SNW1,ELF2,SMARCC2,PRDM2,BCLAF1,LDB1,EWSR1,ARID1B,GPBP1,RNF20,ZNF197,QRICH1
GO:BP	negative regulation of RNA metabolic process	GO:0051253	4.21851e-10	9.37484	1452	91	32	18123	TARDBP,KHDRBS1,HNRNPK,DHX9,THRAP3,HNRNPU,ELAVL1,RBMX,DPF2,HNRNPA0,SCAF8,CTCF,HNRNPA2B1,ILF3,NCOA5,KDM4A,PHF2,SFPQ,ZBTB49,SMARCA5,SRSF10,HNRNPD,SF1,SUDS3,TAF1,SNW1,ELF2,SMARCC2,PRDM2,BCLAF1,LDB1,RNF20
GO:BP	chromatin organization	GO:0006325	5.34228e-10	9.27227	839	91	25	18123	SART3,SAFB,HNRNPU,DPF2,BRD2,CTCF,KDM3B,KDM4A,PHF2,SFPQ,EP400,WDR82,ARID1A,EPC2,IWS1,SMARCA5,SUDS3,TAF1,SETD2,SNW1,SMARCC2,PRDM2,LDB1,ARID1B,RNF20
GO:BP	heterocycle biosynthetic process	GO:0018130	5.79419e-10	9.23701	4275	91	54	18123	UBTF,KHDRBS1,HNRNPK,DHX9,THRAP3,SAFB,HNRNPU,TP53BP1,NRF1,RBMX,FUBP1,DPF2,BRD2,SCAF8,ERCC3,CTCF,HNRNPA2B1,ILF3,KDM3B,CPSF7,NCOA5,KDM4A,PHF2,ZNF740,SFPQ,ARID1A,EPC2,ZBTB49,FUBP3,IWS1,SMARCA5,ZC3H4,SRSF10,HNRNPD,SF1,SUDS3,TAF1,SETD2,TFCP2,ADNP,ZNF2,SMARCAL1,SNW1,ELF2,SMARCC2,PRDM2,BCLAF1,LDB1,EWSR1,ARID1B,GPBP1,RNF20,ZNF197,QRICH1
GO:BP	aromatic compound biosynthetic process	GO:0019438	6.4098e-10	9.19316	4285	91	54	18123	UBTF,KHDRBS1,HNRNPK,DHX9,THRAP3,SAFB,HNRNPU,TP53BP1,NRF1,RBMX,FUBP1,DPF2,BRD2,SCAF8,ERCC3,CTCF,HNRNPA2B1,ILF3,KDM3B,CPSF7,NCOA5,KDM4A,PHF2,ZNF740,SFPQ,ARID1A,EPC2,ZBTB49,FUBP3,IWS1,SMARCA5,ZC3H4,SRSF10,HNRNPD,SF1,SUDS3,TAF1,SETD2,TFCP2,ADNP,ZNF2,SMARCAL1,SNW1,ELF2,SMARCC2,PRDM2,BCLAF1,LDB1,EWSR1,ARID1B,GPBP1,RNF20,ZNF197,QRICH1
GO:BP	primary metabolic process	GO:0044238	1.27342e-09	8.89503	10642	91	84	18123	UBTF,TARDBP,KHDRBS1,YLPM1,HNRNPK,HNRNPR,DHX9,THRAP3,SART3,SAFB,HNRNPU,TP53BP1,ELAVL1,YTHDC1,NRF1,RBMX,FUBP1,DPF2,HNRNPDL,HNRNPA0,HNRNPM,BRD2,SCAF8,MFAP1,ERCC3,CTCF,SRSF1,HNRNPA2B1,ILF3,KDM3B,CPSF7,NCOA5,KDM4A,CPSF6,PHF2,ZNF740,PDCD7,SFPQ,EP400,XRCC1,WDR82,ARID1A,EPC2,HNRNPL,PUM2,ZBTB49,FUBP3,IWS1,RBM15B,SMARCA5,ZC3H4,SRSF10,POLDIP3,HNRNPD,FBXO11,EDC3,SF1,SUDS3,TAF1,SETD2,TFCP2,PPP1R8,HNRNPUL1,HNR…
GO:BP	organic cyclic compound biosynthetic process	GO:1901362	3.12175e-09	8.5056	4446	91	54	18123	UBTF,KHDRBS1,HNRNPK,DHX9,THRAP3,SAFB,HNRNPU,TP53BP1,NRF1,RBMX,FUBP1,DPF2,BRD2,SCAF8,ERCC3,CTCF,HNRNPA2B1,ILF3,KDM3B,CPSF7,NCOA5,KDM4A,PHF2,ZNF740,SFPQ,ARID1A,EPC2,ZBTB49,FUBP3,IWS1,SMARCA5,ZC3H4,SRSF10,HNRNPD,SF1,SUDS3,TAF1,SETD2,TFCP2,ADNP,ZNF2,SMARCAL1,SNW1,ELF2,SMARCC2,PRDM2,BCLAF1,LDB1,EWSR1,ARID1B,GPBP1,RNF20,ZNF197,QRICH1
GO:BP	positive regulation of macromolecule metabolic process	GO:0010604	4.16836e-09	8.38003	3568	91	48	18123	UBTF,TARDBP,KHDRBS1,HNRNPK,HNRNPR,DHX9,THRAP3,SART3,HNRNPU,TP53BP1,ELAVL1,NRF1,RBMX,FUBP1,DPF2,HNRNPA0,SCAF8,CTCF,SRSF1,HNRNPA2B1,ILF3,KDM4A,PHF2,SFPQ,XRCC1,ARID1A,ZBTB49,FUBP3,SMARCA5,POLDIP3,HNRNPD,EDC3,TAF1,SETD2,TFCP2,ADNP,SNW1,ELF2,HNRNPLL,SMARCC2,PRDM2,BCLAF1,LDB1,ARID1B,GPBP1,RNF20,ZNF197,QRICH1
GO:BP	cellular metabolic process	GO:0044237	9.99015e-09	8.00043	10941	91	84	18123	UBTF,TARDBP,KHDRBS1,YLPM1,HNRNPK,HNRNPR,DHX9,THRAP3,SART3,SAFB,HNRNPU,TP53BP1,ELAVL1,YTHDC1,NRF1,RBMX,FUBP1,DPF2,HNRNPDL,HNRNPA0,HNRNPM,BRD2,SCAF8,MFAP1,ERCC3,CTCF,SRSF1,HNRNPA2B1,ILF3,KDM3B,CPSF7,NCOA5,KDM4A,CPSF6,PHF2,ZNF740,PDCD7,SFPQ,EP400,XRCC1,WDR82,ARID1A,EPC2,HNRNPL,PUM2,ZBTB49,FUBP3,IWS1,RBM15B,SMARCA5,ZC3H4,SRSF10,POLDIP3,HNRNPD,FBXO11,EDC3,SF1,SUDS3,TAF1,SETD2,TFCP2,PPP1R8,HNRNPUL1,HNR…
GO:BP	regulation of transcription by RNA polymerase II	GO:0006357	1.05157e-08	7.97816	2567	91	40	18123	KHDRBS1,HNRNPK,DHX9,THRAP3,SAFB,HNRNPU,TP53BP1,NRF1,RBMX,DPF2,BRD2,SCAF8,CTCF,HNRNPA2B1,KDM3B,NCOA5,PHF2,ZNF740,SFPQ,ARID1A,EPC2,ZBTB49,FUBP3,SMARCA5,ZC3H4,HNRNPD,SUDS3,TAF1,TFCP2,ADNP,ZNF2,SMARCAL1,SNW1,ELF2,SMARCC2,PRDM2,BCLAF1,LDB1,ARID1B,ZNF197
GO:BP	positive regulation of macromolecule biosynthetic process	GO:0010557	1.15189e-08	7.93859	1859	91	34	18123	UBTF,KHDRBS1,HNRNPK,DHX9,THRAP3,HNRNPU,TP53BP1,ELAVL1,NRF1,RBMX,DPF2,SCAF8,CTCF,ILF3,PHF2,SFPQ,ARID1A,ZBTB49,FUBP3,SMARCA5,POLDIP3,HNRNPD,TFCP2,SNW1,ELF2,SMARCC2,PRDM2,BCLAF1,LDB1,ARID1B,GPBP1,RNF20,ZNF197,QRICH1
GO:BP	positive regulation of nitrogen compound metabolic process	GO:0051173	1.85494e-08	7.73167	3143	91	44	18123	UBTF,TARDBP,KHDRBS1,HNRNPK,HNRNPR,DHX9,THRAP3,SART3,HNRNPU,TP53BP1,ELAVL1,NRF1,RBMX,DPF2,SCAF8,CTCF,SRSF1,HNRNPA2B1,ILF3,PHF2,SFPQ,XRCC1,ARID1A,ZBTB49,FUBP3,SMARCA5,POLDIP3,HNRNPD,EDC3,TAF1,TFCP2,ADNP,SNW1,ELF2,HNRNPLL,SMARCC2,PRDM2,BCLAF1,LDB1,ARID1B,GPBP1,RNF20,ZNF197,QRICH1
GO:BP	positive regulation of transcription, DNA-templated	GO:0045893	4.77817e-08	7.32074	1623	91	31	18123	UBTF,HNRNPK,DHX9,THRAP3,HNRNPU,TP53BP1,NRF1,RBMX,DPF2,SCAF8,CTCF,ILF3,PHF2,SFPQ,ARID1A,ZBTB49,FUBP3,SMARCA5,HNRNPD,TFCP2,SNW1,ELF2,SMARCC2,PRDM2,BCLAF1,LDB1,ARID1B,GPBP1,RNF20,ZNF197,QRICH1
GO:BP	positive regulation of nucleic acid-templated transcription	GO:1903508	4.77817e-08	7.32074	1623	91	31	18123	UBTF,HNRNPK,DHX9,THRAP3,HNRNPU,TP53BP1,NRF1,RBMX,DPF2,SCAF8,CTCF,ILF3,PHF2,SFPQ,ARID1A,ZBTB49,FUBP3,SMARCA5,HNRNPD,TFCP2,SNW1,ELF2,SMARCC2,PRDM2,BCLAF1,LDB1,ARID1B,GPBP1,RNF20,ZNF197,QRICH1
GO:BP	positive regulation of RNA biosynthetic process	GO:1902680	4.85416e-08	7.31389	1624	91	31	18123	UBTF,HNRNPK,DHX9,THRAP3,HNRNPU,TP53BP1,NRF1,RBMX,DPF2,SCAF8,CTCF,ILF3,PHF2,SFPQ,ARID1A,ZBTB49,FUBP3,SMARCA5,HNRNPD,TFCP2,SNW1,ELF2,SMARCC2,PRDM2,BCLAF1,LDB1,ARID1B,GPBP1,RNF20,ZNF197,QRICH1
GO:BP	positive regulation of cellular biosynthetic process	GO:0031328	6.28602e-08	7.20162	1976	91	34	18123	UBTF,KHDRBS1,HNRNPK,DHX9,THRAP3,HNRNPU,TP53BP1,ELAVL1,NRF1,RBMX,DPF2,SCAF8,CTCF,ILF3,PHF2,SFPQ,ARID1A,ZBTB49,FUBP3,SMARCA5,POLDIP3,HNRNPD,TFCP2,SNW1,ELF2,SMARCC2,PRDM2,BCLAF1,LDB1,ARID1B,GPBP1,RNF20,ZNF197,QRICH1
GO:BP	RNA export from nucleus	GO:0006405	9.0119e-08	7.04518	129	91	11	18123	KHDRBS1,DHX9,YTHDC1,SRSF1,HNRNPA2B1,CPSF6,IWS1,RBM15B,POLDIP3,SETD2,SRSF3
GO:BP	positive regulation of metabolic process	GO:0009893	9.06588e-08	7.04259	3873	91	48	18123	UBTF,TARDBP,KHDRBS1,HNRNPK,HNRNPR,DHX9,THRAP3,SART3,HNRNPU,TP53BP1,ELAVL1,NRF1,RBMX,FUBP1,DPF2,HNRNPA0,SCAF8,CTCF,SRSF1,HNRNPA2B1,ILF3,KDM4A,PHF2,SFPQ,XRCC1,ARID1A,ZBTB49,FUBP3,SMARCA5,POLDIP3,HNRNPD,EDC3,TAF1,SETD2,TFCP2,ADNP,SNW1,ELF2,HNRNPLL,SMARCC2,PRDM2,BCLAF1,LDB1,ARID1B,GPBP1,RNF20,ZNF197,QRICH1
GO:BP	positive regulation of biosynthetic process	GO:0009891	1.04696e-07	6.98007	2013	91	34	18123	UBTF,KHDRBS1,HNRNPK,DHX9,THRAP3,HNRNPU,TP53BP1,ELAVL1,NRF1,RBMX,DPF2,SCAF8,CTCF,ILF3,PHF2,SFPQ,ARID1A,ZBTB49,FUBP3,SMARCA5,POLDIP3,HNRNPD,TFCP2,SNW1,ELF2,SMARCC2,PRDM2,BCLAF1,LDB1,ARID1B,GPBP1,RNF20,ZNF197,QRICH1
GO:BP	positive regulation of cellular metabolic process	GO:0031325	1.53172e-07	6.81482	3342	91	44	18123	UBTF,TARDBP,KHDRBS1,HNRNPK,HNRNPR,DHX9,THRAP3,SART3,HNRNPU,TP53BP1,ELAVL1,NRF1,RBMX,DPF2,SCAF8,CTCF,SRSF1,HNRNPA2B1,ILF3,PHF2,SFPQ,XRCC1,ARID1A,ZBTB49,FUBP3,SMARCA5,POLDIP3,HNRNPD,EDC3,TAF1,TFCP2,ADNP,SNW1,ELF2,HNRNPLL,SMARCC2,PRDM2,BCLAF1,LDB1,ARID1B,GPBP1,RNF20,ZNF197,QRICH1
GO:BP	RNA localization	GO:0006403	1.62466e-07	6.78924	222	91	13	18123	KHDRBS1,DHX9,HNRNPU,YTHDC1,SRSF1,HNRNPA2B1,CPSF6,IWS1,RBM15B,POLDIP3,SETD2,SRSF3,BCLAF1
GO:BP	organic substance metabolic process	GO:0071704	2.00413e-07	6.69807	11397	91	84	18123	UBTF,TARDBP,KHDRBS1,YLPM1,HNRNPK,HNRNPR,DHX9,THRAP3,SART3,SAFB,HNRNPU,TP53BP1,ELAVL1,YTHDC1,NRF1,RBMX,FUBP1,DPF2,HNRNPDL,HNRNPA0,HNRNPM,BRD2,SCAF8,MFAP1,ERCC3,CTCF,SRSF1,HNRNPA2B1,ILF3,KDM3B,CPSF7,NCOA5,KDM4A,CPSF6,PHF2,ZNF740,PDCD7,SFPQ,EP400,XRCC1,WDR82,ARID1A,EPC2,HNRNPL,PUM2,ZBTB49,FUBP3,IWS1,RBM15B,SMARCA5,ZC3H4,SRSF10,POLDIP3,HNRNPD,FBXO11,EDC3,SF1,SUDS3,TAF1,SETD2,TFCP2,PPP1R8,HNRNPUL1,HNR…
GO:BP	RNA transport	GO:0050658	2.46575e-07	6.60805	183	91	12	18123	KHDRBS1,DHX9,YTHDC1,SRSF1,HNRNPA2B1,CPSF6,IWS1,RBM15B,POLDIP3,SETD2,SRSF3,BCLAF1
GO:BP	nucleic acid transport	GO:0050657	2.46575e-07	6.60805	183	91	12	18123	KHDRBS1,DHX9,YTHDC1,SRSF1,HNRNPA2B1,CPSF6,IWS1,RBM15B,POLDIP3,SETD2,SRSF3,BCLAF1
GO:BP	establishment of RNA localization	GO:0051236	2.97884e-07	6.52595	186	91	12	18123	KHDRBS1,DHX9,YTHDC1,SRSF1,HNRNPA2B1,CPSF6,IWS1,RBM15B,POLDIP3,SETD2,SRSF3,BCLAF1
GO:BP	cellular macromolecule metabolic process	GO:0044260	3.3899e-07	6.46981	8430	91	72	18123	UBTF,TARDBP,KHDRBS1,YLPM1,HNRNPK,HNRNPR,DHX9,THRAP3,SART3,SAFB,HNRNPU,TP53BP1,ELAVL1,NRF1,RBMX,FUBP1,DPF2,HNRNPA0,HNRNPM,BRD2,SCAF8,ERCC3,CTCF,HNRNPA2B1,ILF3,KDM3B,CPSF7,NCOA5,KDM4A,PHF2,ZNF740,SFPQ,EP400,XRCC1,WDR82,ARID1A,EPC2,PUM2,ZBTB49,FUBP3,IWS1,RBM15B,SMARCA5,ZC3H4,SRSF10,POLDIP3,HNRNPD,FBXO11,EDC3,SF1,SUDS3,TAF1,SETD2,TFCP2,PPP1R8,ADNP,ZNF2,SMARCAL1,SNW1,ELF2,SENP6,SMARCC2,PRDM2,BCLAF1,LD…
GO:BP	histone modification	GO:0016570	3.41963e-07	6.46602	472	91	17	18123	SART3,CTCF,KDM3B,KDM4A,PHF2,SFPQ,EP400,WDR82,EPC2,IWS1,SUDS3,TAF1,SETD2,SNW1,PRDM2,LDB1,RNF20
GO:BP	covalent chromatin modification	GO:0016569	5.36447e-07	6.27047	486	91	17	18123	SART3,CTCF,KDM3B,KDM4A,PHF2,SFPQ,EP400,WDR82,EPC2,IWS1,SUDS3,TAF1,SETD2,SNW1,PRDM2,LDB1,RNF20
GO:BP	nuclear export	GO:0051168	7.73844e-07	6.11135	202	91	12	18123	KHDRBS1,DHX9,YTHDC1,SRSF1,HNRNPA2B1,RANBP3,CPSF6,IWS1,RBM15B,POLDIP3,SETD2,SRSF3
GO:BP	negative regulation of nitrogen compound metabolic process	GO:0051172	1.32063e-06	5.87922	2592	91	37	18123	TARDBP,KHDRBS1,HNRNPK,HNRNPR,DHX9,THRAP3,HNRNPU,TP53BP1,ELAVL1,RBMX,DPF2,HNRNPA0,SCAF8,CTCF,HNRNPA2B1,ILF3,NCOA5,KDM4A,PHF2,SFPQ,XRCC1,ZBTB49,SMARCA5,SRSF10,HNRNPD,EDC3,SF1,SUDS3,TAF1,PPP1R8,SNW1,ELF2,SMARCC2,PRDM2,BCLAF1,LDB1,RNF20
GO:BP	cellular biosynthetic process	GO:0044249	1.34029e-06	5.8728	6210	91	60	18123	UBTF,TARDBP,KHDRBS1,HNRNPK,HNRNPR,DHX9,THRAP3,SAFB,HNRNPU,TP53BP1,ELAVL1,NRF1,RBMX,FUBP1,DPF2,BRD2,SCAF8,ERCC3,CTCF,HNRNPA2B1,ILF3,KDM3B,CPSF7,NCOA5,KDM4A,PHF2,ZNF740,SFPQ,ARID1A,EPC2,PUM2,ZBTB49,FUBP3,IWS1,SMARCA5,ZC3H4,SRSF10,POLDIP3,HNRNPD,EDC3,SF1,SUDS3,TAF1,SETD2,TFCP2,ADNP,ZNF2,SMARCAL1,SNW1,ELF2,SMARCC2,PRDM2,BCLAF1,LDB1,EWSR1,ARID1B,GPBP1,RNF20,ZNF197,QRICH1
GO:BP	organic substance biosynthetic process	GO:1901576	2.48804e-06	5.60414	6297	91	60	18123	UBTF,TARDBP,KHDRBS1,HNRNPK,HNRNPR,DHX9,THRAP3,SAFB,HNRNPU,TP53BP1,ELAVL1,NRF1,RBMX,FUBP1,DPF2,BRD2,SCAF8,ERCC3,CTCF,HNRNPA2B1,ILF3,KDM3B,CPSF7,NCOA5,KDM4A,PHF2,ZNF740,SFPQ,ARID1A,EPC2,PUM2,ZBTB49,FUBP3,IWS1,SMARCA5,ZC3H4,SRSF10,POLDIP3,HNRNPD,EDC3,SF1,SUDS3,TAF1,SETD2,TFCP2,ADNP,ZNF2,SMARCAL1,SNW1,ELF2,SMARCC2,PRDM2,BCLAF1,LDB1,EWSR1,ARID1B,GPBP1,RNF20,ZNF197,QRICH1
GO:BP	negative regulation of cellular metabolic process	GO:0031324	2.52088e-06	5.59845	2785	91	38	18123	TARDBP,KHDRBS1,HNRNPK,HNRNPR,DHX9,THRAP3,HNRNPU,TP53BP1,ELAVL1,RBMX,DPF2,HNRNPA0,SCAF8,CTCF,HNRNPA2B1,ILF3,NCOA5,KDM4A,PHF2,SFPQ,XRCC1,ZBTB49,SMARCA5,SRSF10,HNRNPD,EDC3,SF1,SUDS3,TAF1,PPP1R8,SMARCAL1,SNW1,ELF2,SMARCC2,PRDM2,BCLAF1,LDB1,RNF20
GO:BP	regulation of RNA export from nucleus	GO:0046831	4.40021e-06	5.35653	12	91	5	18123	KHDRBS1,DHX9,CPSF6,IWS1,SETD2
GO:BP	negative regulation of macromolecule metabolic process	GO:0010605	4.58758e-06	5.33842	3262	91	41	18123	TARDBP,KHDRBS1,HNRNPK,HNRNPR,DHX9,THRAP3,HNRNPU,TP53BP1,ELAVL1,RBMX,DPF2,HNRNPA0,HNRNPM,SCAF8,CTCF,HNRNPA2B1,ILF3,NCOA5,KDM4A,PHF2,SFPQ,XRCC1,PUM2,ZBTB49,SMARCA5,SRSF10,HNRNPD,EDC3,SF1,SUDS3,TAF1,PPP1R8,ADNP,SMARCAL1,SNW1,ELF2,SMARCC2,PRDM2,BCLAF1,LDB1,RNF20
GO:BP	biosynthetic process	GO:0009058	4.78354e-06	5.32025	6391	91	60	18123	UBTF,TARDBP,KHDRBS1,HNRNPK,HNRNPR,DHX9,THRAP3,SAFB,HNRNPU,TP53BP1,ELAVL1,NRF1,RBMX,FUBP1,DPF2,BRD2,SCAF8,ERCC3,CTCF,HNRNPA2B1,ILF3,KDM3B,CPSF7,NCOA5,KDM4A,PHF2,ZNF740,SFPQ,ARID1A,EPC2,PUM2,ZBTB49,FUBP3,IWS1,SMARCA5,ZC3H4,SRSF10,POLDIP3,HNRNPD,EDC3,SF1,SUDS3,TAF1,SETD2,TFCP2,ADNP,ZNF2,SMARCAL1,SNW1,ELF2,SMARCC2,PRDM2,BCLAF1,LDB1,EWSR1,ARID1B,GPBP1,RNF20,ZNF197,QRICH1
GO:BP	nucleocytoplasmic transport	GO:0006913	4.82353e-06	5.31663	353	91	14	18123	TARDBP,KHDRBS1,DHX9,ELAVL1,YTHDC1,SRSF1,HNRNPA2B1,RANBP3,CPSF6,IWS1,RBM15B,POLDIP3,SETD2,SRSF3
GO:BP	metabolic process	GO:0008152	4.94707e-06	5.30565	11915	91	84	18123	UBTF,TARDBP,KHDRBS1,YLPM1,HNRNPK,HNRNPR,DHX9,THRAP3,SART3,SAFB,HNRNPU,TP53BP1,ELAVL1,YTHDC1,NRF1,RBMX,FUBP1,DPF2,HNRNPDL,HNRNPA0,HNRNPM,BRD2,SCAF8,MFAP1,ERCC3,CTCF,SRSF1,HNRNPA2B1,ILF3,KDM3B,CPSF7,NCOA5,KDM4A,CPSF6,PHF2,ZNF740,PDCD7,SFPQ,EP400,XRCC1,WDR82,ARID1A,EPC2,HNRNPL,PUM2,ZBTB49,FUBP3,IWS1,RBM15B,SMARCA5,ZC3H4,SRSF10,POLDIP3,HNRNPD,FBXO11,EDC3,SF1,SUDS3,TAF1,SETD2,TFCP2,PPP1R8,HNRNPUL1,HNR…
GO:BP	nuclear transport	GO:0051169	5.37712e-06	5.26945	356	91	14	18123	TARDBP,KHDRBS1,DHX9,ELAVL1,YTHDC1,SRSF1,HNRNPA2B1,RANBP3,CPSF6,IWS1,RBM15B,POLDIP3,SETD2,SRSF3
GO:BP	nucleobase-containing compound transport	GO:0015931	7.31872e-06	5.13556	246	91	12	18123	KHDRBS1,DHX9,YTHDC1,SRSF1,HNRNPA2B1,CPSF6,IWS1,RBM15B,POLDIP3,SETD2,SRSF3,BCLAF1
GO:BP	mRNA transport	GO:0051028	8.62237e-06	5.06437	151	91	10	18123	DHX9,YTHDC1,SRSF1,HNRNPA2B1,IWS1,RBM15B,POLDIP3,SETD2,SRSF3,BCLAF1
GO:BP	regulation of nucleobase-containing compound transport	GO:0032239	1.6487e-05	4.78286	15	91	5	18123	KHDRBS1,DHX9,CPSF6,IWS1,SETD2
GO:BP	mRNA stabilization	GO:0048255	2.7448e-05	4.56149	57	91	7	18123	TARDBP,DHX9,THRAP3,HNRNPU,ELAVL1,HNRNPA0,HNRNPD
GO:BP	negative regulation of metabolic process	GO:0009892	3.78449e-05	4.42199	3498	91	41	18123	TARDBP,KHDRBS1,HNRNPK,HNRNPR,DHX9,THRAP3,HNRNPU,TP53BP1,ELAVL1,RBMX,DPF2,HNRNPA0,HNRNPM,SCAF8,CTCF,HNRNPA2B1,ILF3,NCOA5,KDM4A,PHF2,SFPQ,XRCC1,PUM2,ZBTB49,SMARCA5,SRSF10,HNRNPD,EDC3,SF1,SUDS3,TAF1,PPP1R8,ADNP,SMARCAL1,SNW1,ELF2,SMARCC2,PRDM2,BCLAF1,LDB1,RNF20
GO:BP	regulation of alternative mRNA splicing, via spliceosome	GO:0000381	3.96095e-05	4.4022	60	91	7	18123	KHDRBS1,THRAP3,HNRNPU,YTHDC1,RBMX,HNRNPL,RBM15B
GO:BP	negative regulation of cellular macromolecule biosynthetic process	GO:2000113	5.74348e-05	4.24083	1679	91	27	18123	TARDBP,KHDRBS1,HNRNPR,HNRNPU,DPF2,SCAF8,CTCF,HNRNPA2B1,ILF3,NCOA5,KDM4A,PHF2,SFPQ,ZBTB49,SMARCA5,HNRNPD,EDC3,SF1,SUDS3,TAF1,SMARCAL1,SNW1,ELF2,SMARCC2,PRDM2,BCLAF1,LDB1
GO:BP	negative regulation of mRNA catabolic process	GO:1902373	6.26854e-05	4.20283	64	91	7	18123	TARDBP,DHX9,THRAP3,HNRNPU,ELAVL1,HNRNPA0,HNRNPD
GO:BP	regulation of chromosome organization	GO:0033044	6.44244e-05	4.19095	299	91	12	18123	YLPM1,SART3,HNRNPU,CTCF,HNRNPA2B1,PHF2,SFPQ,XRCC1,HNRNPD,SNW1,SENP6,RNF20
GO:BP	negative regulation of macromolecule biosynthetic process	GO:0010558	6.58613e-05	4.18137	1690	91	27	18123	TARDBP,KHDRBS1,HNRNPR,HNRNPU,DPF2,SCAF8,CTCF,HNRNPA2B1,ILF3,NCOA5,KDM4A,PHF2,SFPQ,ZBTB49,SMARCA5,HNRNPD,EDC3,SF1,SUDS3,TAF1,SMARCAL1,SNW1,ELF2,SMARCC2,PRDM2,BCLAF1,LDB1
GO:BP	RNA stabilization	GO:0043489	7.795e-05	4.10818	66	91	7	18123	TARDBP,DHX9,THRAP3,HNRNPU,ELAVL1,HNRNPA0,HNRNPD
GO:BP	regulation of mRNA stability	GO:0043488	8.7421e-05	4.05838	247	91	11	18123	TARDBP,HNRNPR,DHX9,THRAP3,HNRNPU,ELAVL1,HNRNPA0,HNRNPM,PUM2,HNRNPD,EDC3
GO:BP	mRNA 3'-end processing	GO:0031124	0.000102686	3.98849	104	91	8	18123	YTHDC1,SCAF8,SRSF1,CPSF7,CPSF6,POLDIP3,SRSF3,RNF20
GO:BP	regulation of mRNA catabolic process	GO:0061013	0.000121018	3.91715	255	91	11	18123	TARDBP,HNRNPR,DHX9,THRAP3,HNRNPU,ELAVL1,HNRNPA0,HNRNPM,PUM2,HNRNPD,EDC3
GO:BP	regulation of RNA stability	GO:0043487	0.000141778	3.84839	259	91	11	18123	TARDBP,HNRNPR,DHX9,THRAP3,HNRNPU,ELAVL1,HNRNPA0,HNRNPM,PUM2,HNRNPD,EDC3
GO:BP	negative regulation of cellular biosynthetic process	GO:0031327	0.000151394	3.81989	1759	91	27	18123	TARDBP,KHDRBS1,HNRNPR,HNRNPU,DPF2,SCAF8,CTCF,HNRNPA2B1,ILF3,NCOA5,KDM4A,PHF2,SFPQ,ZBTB49,SMARCA5,HNRNPD,EDC3,SF1,SUDS3,TAF1,SMARCAL1,SNW1,ELF2,SMARCC2,PRDM2,BCLAF1,LDB1
GO:BP	positive regulation of gene expression	GO:0010628	0.000177181	3.75158	1206	91	22	18123	TARDBP,KHDRBS1,DHX9,THRAP3,HNRNPU,TP53BP1,ELAVL1,RBMX,FUBP1,HNRNPA0,CTCF,SRSF1,KDM4A,ARID1A,FUBP3,SMARCA5,POLDIP3,HNRNPD,SETD2,SNW1,HNRNPLL,ARID1B
GO:BP	mRNA export from nucleus	GO:0006406	0.000183474	3.73642	112	91	8	18123	YTHDC1,SRSF1,HNRNPA2B1,IWS1,RBM15B,POLDIP3,SETD2,SRSF3
GO:BP	mRNA-containing ribonucleoprotein complex export from nucleus	GO:0071427	0.000183474	3.73642	112	91	8	18123	YTHDC1,SRSF1,HNRNPA2B1,IWS1,RBM15B,POLDIP3,SETD2,SRSF3
GO:BP	negative regulation of RNA catabolic process	GO:1902369	0.00021011	3.67755	76	91	7	18123	TARDBP,DHX9,THRAP3,HNRNPU,ELAVL1,HNRNPA0,HNRNPD
GO:BP	negative regulation of biosynthetic process	GO:0009890	0.000219439	3.65869	1791	91	27	18123	TARDBP,KHDRBS1,HNRNPR,HNRNPU,DPF2,SCAF8,CTCF,HNRNPA2B1,ILF3,NCOA5,KDM4A,PHF2,SFPQ,ZBTB49,SMARCA5,HNRNPD,EDC3,SF1,SUDS3,TAF1,SMARCAL1,SNW1,ELF2,SMARCC2,PRDM2,BCLAF1,LDB1
GO:BP	RNA catabolic process	GO:0006401	0.000462905	3.33451	431	91	13	18123	TARDBP,HNRNPR,DHX9,THRAP3,HNRNPU,ELAVL1,HNRNPA0,HNRNPM,PUM2,HNRNPD,EDC3,PPP1R8,BCLAF1
GO:BP	ribonucleoprotein complex export from nucleus	GO:0071426	0.000582341	3.23482	130	91	8	18123	YTHDC1,SRSF1,HNRNPA2B1,IWS1,RBM15B,POLDIP3,SETD2,SRSF3
GO:BP	ribonucleoprotein complex localization	GO:0071166	0.000617693	3.20923	131	91	8	18123	YTHDC1,SRSF1,HNRNPA2B1,IWS1,RBM15B,POLDIP3,SETD2,SRSF3
GO:BP	protein methylation	GO:0006479	0.000755924	3.12152	185	91	9	18123	CTCF,KDM4A,WDR82,IWS1,FBXO11,SETD2,SNW1,PRDM2,RNF20
GO:BP	protein alkylation	GO:0008213	0.000755924	3.12152	185	91	9	18123	CTCF,KDM4A,WDR82,IWS1,FBXO11,SETD2,SNW1,PRDM2,RNF20
GO:BP	negative regulation of mRNA processing	GO:0050686	0.00087559	3.0577	31	91	5	18123	HNRNPK,RBMX,HNRNPA2B1,SRSF10,RNF20
GO:BP	mRNA catabolic process	GO:0006402	0.00107711	2.96774	388	91	12	18123	TARDBP,HNRNPR,DHX9,THRAP3,HNRNPU,ELAVL1,HNRNPA0,HNRNPM,PUM2,HNRNPD,EDC3,BCLAF1
GO:BP	negative regulation of transcription, DNA-templated	GO:0045892	0.00107908	2.96695	1339	91	22	18123	KHDRBS1,HNRNPU,DPF2,SCAF8,CTCF,HNRNPA2B1,ILF3,NCOA5,KDM4A,PHF2,SFPQ,ZBTB49,SMARCA5,SF1,SUDS3,TAF1,SNW1,ELF2,SMARCC2,PRDM2,BCLAF1,LDB1
GO:BP	negative regulation of nucleic acid-templated transcription	GO:1903507	0.00110678	2.95594	1341	91	22	18123	KHDRBS1,HNRNPU,DPF2,SCAF8,CTCF,HNRNPA2B1,ILF3,NCOA5,KDM4A,PHF2,SFPQ,ZBTB49,SMARCA5,SF1,SUDS3,TAF1,SNW1,ELF2,SMARCC2,PRDM2,BCLAF1,LDB1
GO:BP	negative regulation of RNA biosynthetic process	GO:1902679	0.00113513	2.94495	1343	91	22	18123	KHDRBS1,HNRNPU,DPF2,SCAF8,CTCF,HNRNPA2B1,ILF3,NCOA5,KDM4A,PHF2,SFPQ,ZBTB49,SMARCA5,SF1,SUDS3,TAF1,SNW1,ELF2,SMARCC2,PRDM2,BCLAF1,LDB1
GO:BP	ribonucleoprotein complex assembly	GO:0022618	0.00122914	2.9104	196	91	9	18123	DHX9,SART3,YTHDC1,SRSF1,CPSF7,CPSF6,SRSF10,SF1,SNRNP200
GO:BP	histone methylation	GO:0016571	0.00134291	2.87195	145	91	8	18123	CTCF,KDM4A,WDR82,IWS1,SETD2,SNW1,PRDM2,RNF20
GO:BP	organelle organization	GO:0006996	0.00151994	2.81817	4136	91	42	18123	TARDBP,YLPM1,DHX9,SART3,SAFB,HNRNPU,NRF1,DPF2,BRD2,ERCC3,CTCF,HNRNPA2B1,KDM3B,KDM4A,PHF2,ZMYM3,SFPQ,EP400,XRCC1,WDR82,ARID1A,STRIP1,EPC2,ZMYM4,PUM2,IWS1,SMARCA5,HNRNPD,WDR92,EDC3,SF1,SUDS3,TAF1,SETD2,SMARCAL1,SNW1,SENP6,SMARCC2,PRDM2,LDB1,ARID1B,RNF20
GO:BP	ribonucleoprotein complex subunit organization	GO:0071826	0.0016488	2.78283	203	91	9	18123	DHX9,SART3,YTHDC1,SRSF1,CPSF7,CPSF6,SRSF10,SF1,SNRNP200
GO:BP	positive regulation of RNA export from nucleus	GO:0046833	0.00243174	2.61408	5	91	3	18123	KHDRBS1,DHX9,CPSF6
GO:BP	mRNA alternative polyadenylation	GO:0110104	0.00243174	2.61408	5	91	3	18123	YTHDC1,CPSF7,CPSF6
GO:BP	RNA 3'-end processing	GO:0031123	0.00245289	2.61032	157	91	8	18123	YTHDC1,SCAF8,SRSF1,CPSF7,CPSF6,POLDIP3,SRSF3,RNF20
GO:BP	protein-DNA complex subunit organization	GO:0071824	0.0025394	2.59527	346	91	11	18123	UBTF,SART3,BRD2,ERCC3,CTCF,ARID1A,SMARCA5,TAF1,SETD2,SENP6,SMARCC2
GO:BP	regulation of mRNA polyadenylation	GO:1900363	0.00269323	2.56973	17	91	4	18123	YTHDC1,CPSF7,CPSF6,RNF20
GO:BP	positive regulation of RNA splicing	GO:0033120	0.00287459	2.54142	39	91	5	18123	THRAP3,RBMX,SRSF1,SNW1,HNRNPLL
GO:BP	protein-containing complex localization	GO:0031503	0.00374829	2.42617	289	91	10	18123	HNRNPU,YTHDC1,SRSF1,HNRNPA2B1,SFPQ,IWS1,RBM15B,POLDIP3,SETD2,SRSF3
GO:BP	positive regulation of nucleobase-containing compound transport	GO:0032241	0.00484576	2.31464	6	91	3	18123	KHDRBS1,DHX9,CPSF6
GO:BP	posttranscriptional regulation of gene expression	GO:0010608	0.00633242	2.19843	928	91	17	18123	TARDBP,KHDRBS1,HNRNPR,DHX9,THRAP3,HNRNPU,ELAVL1,YTHDC1,HNRNPA0,HNRNPM,HNRNPA2B1,ILF3,PUM2,POLDIP3,HNRNPD,EDC3,BCLAF1
GO:BP	regulation of biological process	GO:0050789	0.00687479	2.16274	12122	91	80	18123	UBTF,TARDBP,KHDRBS1,YLPM1,HNRNPK,HNRNPR,DHX9,THRAP3,SART3,SAFB,HNRNPU,TP53BP1,ELAVL1,YTHDC1,NRF1,RBMX,FUBP1,DPF2,HNRNPDL,HNRNPA0,HNRNPM,BRD2,SCAF8,ERCC3,CTCF,SRSF1,HNRNPA2B1,ILF3,KDM3B,CPSF7,NCOA5,KDM4A,CPSF6,PHF2,ZNF740,ZMYM3,SFPQ,XRCC1,ARID1A,STRIP1,EPC2,ZMYM4,HNRNPL,PUM2,ZBTB49,FUBP3,IWS1,RBM15B,SMARCA5,ZC3H4,SRSF10,POLDIP3,HNRNPD,FBXO11,EDC3,SF1,SUDS3,TAF1,SETD2,TFCP2,PPP1R8,HNRNPH3,ADNP,ZNF2…
GO:BP	cellular component organization	GO:0016043	0.00724104	2.1402	6661	91	55	18123	UBTF,TARDBP,YLPM1,HNRNPK,DHX9,SART3,SAFB,HNRNPU,TP53BP1,ELAVL1,YTHDC1,NRF1,RBMX,DPF2,BRD2,SCAF8,ERCC3,CTCF,SRSF1,HNRNPA2B1,KDM3B,CPSF7,KDM4A,CPSF6,PHF2,ZMYM3,SFPQ,EP400,XRCC1,WDR82,ARID1A,STRIP1,EPC2,ZMYM4,PUM2,IWS1,SMARCA5,SRSF10,HNRNPD,WDR92,EDC3,SF1,SUDS3,TAF1,SETD2,ADNP,SNRNP200,SMARCAL1,SNW1,SENP6,SMARCC2,PRDM2,LDB1,ARID1B,RNF20
GO:BP	negative regulation of mRNA splicing, via spliceosome	GO:0048025	0.00812022	2.09043	22	91	4	18123	HNRNPK,RBMX,HNRNPA2B1,SRSF10
GO:BP	macromolecule methylation	GO:0043414	0.00954913	2.02004	321	91	10	18123	CTCF,KDM4A,WDR82,IWS1,RBM15B,FBXO11,SETD2,SNW1,PRDM2,RNF20
GO:BP	nucleobase-containing compound catabolic process	GO:0034655	0.0110307	1.9574	573	91	13	18123	TARDBP,HNRNPR,DHX9,THRAP3,HNRNPU,ELAVL1,HNRNPA0,HNRNPM,PUM2,HNRNPD,EDC3,PPP1R8,BCLAF1
GO:BP	mRNA polyadenylation	GO:0006378	0.0111849	1.95137	51	91	5	18123	YTHDC1,SCAF8,CPSF7,CPSF6,RNF20
GO:BP	RNA polyadenylation	GO:0043631	0.012326	1.90918	52	91	5	18123	YTHDC1,SCAF8,CPSF7,CPSF6,RNF20
GO:BP	peptidyl-lysine modification	GO:0018205	0.0123838	1.90715	408	91	11	18123	CTCF,KDM4A,EP400,WDR82,EPC2,IWS1,TAF1,SETD2,SNW1,SENP6,LDB1
GO:BP	positive regulation of transcription by RNA polymerase II	GO:0045944	0.0128719	1.89036	1200	91	19	18123	HNRNPK,DHX9,THRAP3,HNRNPU,TP53BP1,NRF1,RBMX,DPF2,SFPQ,ZBTB49,FUBP3,SMARCA5,HNRNPD,TFCP2,SNW1,PRDM2,BCLAF1,LDB1,ZNF197
GO:BP	negative regulation of cellular catabolic process	GO:0031330	0.0142598	1.84589	264	91	9	18123	TARDBP,DHX9,THRAP3,HNRNPU,ELAVL1,HNRNPA0,KDM4A,HNRNPD,TAF1
GO:BP	regulation of cellular process	GO:0050794	0.0147972	1.82982	11517	91	77	18123	UBTF,TARDBP,KHDRBS1,YLPM1,HNRNPK,HNRNPR,DHX9,THRAP3,SART3,SAFB,HNRNPU,TP53BP1,ELAVL1,YTHDC1,NRF1,RBMX,FUBP1,DPF2,HNRNPDL,HNRNPA0,HNRNPM,BRD2,SCAF8,ERCC3,CTCF,SRSF1,HNRNPA2B1,ILF3,KDM3B,CPSF7,NCOA5,KDM4A,CPSF6,PHF2,ZNF740,SFPQ,XRCC1,ARID1A,EPC2,HNRNPL,PUM2,ZBTB49,FUBP3,IWS1,RBM15B,SMARCA5,ZC3H4,SRSF10,POLDIP3,HNRNPD,FBXO11,EDC3,SF1,SUDS3,TAF1,SETD2,TFCP2,PPP1R8,HNRNPH3,ADNP,ZNF2,SMARCAL1,SNW1,ELF2…
GO:BP	positive regulation of mRNA metabolic process	GO:1903313	0.0160224	1.79527	144	91	7	18123	TARDBP,HNRNPR,THRAP3,RBMX,HNRNPD,EDC3,SNW1
GO:BP	negative regulation of gene expression	GO:0010629	0.0188539	1.7246	1470	91	21	18123	TARDBP,HNRNPK,HNRNPR,DHX9,THRAP3,HNRNPU,ELAVL1,RBMX,HNRNPA0,HNRNPM,CTCF,HNRNPA2B1,ILF3,KDM4A,PUM2,SRSF10,HNRNPD,EDC3,TAF1,ADNP,BCLAF1
GO:BP	negative regulation of RNA splicing	GO:0033119	0.0191114	1.71871	27	91	4	18123	HNRNPK,RBMX,HNRNPA2B1,SRSF10
GO:BP	cellular component organization or biogenesis	GO:0071840	0.0222013	1.65362	6880	91	55	18123	UBTF,TARDBP,YLPM1,HNRNPK,DHX9,SART3,SAFB,HNRNPU,TP53BP1,ELAVL1,YTHDC1,NRF1,RBMX,DPF2,BRD2,SCAF8,ERCC3,CTCF,SRSF1,HNRNPA2B1,KDM3B,CPSF7,KDM4A,CPSF6,PHF2,ZMYM3,SFPQ,EP400,XRCC1,WDR82,ARID1A,STRIP1,EPC2,ZMYM4,PUM2,IWS1,SMARCA5,SRSF10,HNRNPD,WDR92,EDC3,SF1,SUDS3,TAF1,SETD2,ADNP,SNRNP200,SMARCAL1,SNW1,SENP6,SMARCC2,PRDM2,LDB1,ARID1B,RNF20
GO:BP	regulation of mRNA 3'-end processing	GO:0031440	0.0222112	1.65343	28	91	4	18123	YTHDC1,CPSF7,CPSF6,RNF20
GO:BP	spliceosomal complex assembly	GO:0000245	0.0230961	1.63646	59	91	5	18123	YTHDC1,SRSF1,SRSF10,SF1,SNRNP200
GO:BP	heterocycle catabolic process	GO:0046700	0.024366	1.61322	617	91	13	18123	TARDBP,HNRNPR,DHX9,THRAP3,HNRNPU,ELAVL1,HNRNPA0,HNRNPM,PUM2,HNRNPD,EDC3,PPP1R8,BCLAF1
GO:BP	cellular nitrogen compound catabolic process	GO:0044270	0.0269987	1.56866	623	91	13	18123	TARDBP,HNRNPR,DHX9,THRAP3,HNRNPU,ELAVL1,HNRNPA0,HNRNPM,PUM2,HNRNPD,EDC3,PPP1R8,BCLAF1
GO:BP	DNA-templated transcription, elongation	GO:0006354	0.0277393	1.5569	104	91	6	18123	HNRNPU,SCAF8,ERCC3,IWS1,SETD2,LDB1
GO:BP	regulation of chromatin organization	GO:1902275	0.0317343	1.49847	222	91	8	18123	SART3,HNRNPU,CTCF,KDM4A,PHF2,IWS1,SNW1,RNF20
GO:BP	aromatic compound catabolic process	GO:0019439	0.0335789	1.47393	636	91	13	18123	TARDBP,HNRNPR,DHX9,THRAP3,HNRNPU,ELAVL1,HNRNPA0,HNRNPM,PUM2,HNRNPD,EDC3,PPP1R8,BCLAF1
GO:BP	positive regulation of cellular process	GO:0048522	0.035511	1.44964	5863	91	49	18123	UBTF,TARDBP,KHDRBS1,HNRNPK,HNRNPR,DHX9,THRAP3,SART3,HNRNPU,TP53BP1,ELAVL1,NRF1,RBMX,DPF2,SCAF8,ERCC3,CTCF,SRSF1,HNRNPA2B1,ILF3,KDM4A,CPSF6,PHF2,SFPQ,XRCC1,ARID1A,PUM2,ZBTB49,FUBP3,SMARCA5,POLDIP3,HNRNPD,EDC3,SUDS3,TAF1,TFCP2,ADNP,SNW1,ELF2,HNRNPLL,SMARCC2,PRDM2,BCLAF1,LDB1,ARID1B,GPBP1,RNF20,ZNF197,QRICH1
GO:BP	regulation of nucleocytoplasmic transport	GO:0046822	0.0402461	1.39528	111	91	6	18123	TARDBP,KHDRBS1,DHX9,CPSF6,IWS1,SETD2
GO:BP	methylation	GO:0032259	0.0423977	1.37266	381	91	10	18123	CTCF,KDM4A,WDR82,IWS1,RBM15B,FBXO11,SETD2,SNW1,PRDM2,RNF20
GO:BP	mRNA splice site selection	GO:0006376	0.0435464	1.36105	33	91	4	18123	YTHDC1,SRSF1,SRSF10,SF1
GO:BP	positive regulation of biological process	GO:0048518	0.0482476	1.31652	6474	91	52	18123	UBTF,TARDBP,KHDRBS1,HNRNPK,HNRNPR,DHX9,THRAP3,SART3,HNRNPU,TP53BP1,ELAVL1,NRF1,RBMX,FUBP1,DPF2,HNRNPA0,SCAF8,ERCC3,CTCF,SRSF1,HNRNPA2B1,ILF3,KDM4A,CPSF6,PHF2,SFPQ,XRCC1,ARID1A,PUM2,ZBTB49,FUBP3,SMARCA5,POLDIP3,HNRNPD,EDC3,SUDS3,TAF1,SETD2,TFCP2,ADNP,SNW1,ELF2,HNRNPLL,SMARCC2,PRDM2,BCLAF1,LDB1,ARID1B,GPBP1,RNF20,ZNF197,QRICH1
GO:BP	biological regulation	GO:0065007	0.0486151	1.31323	12802	91	81	18123	UBTF,TARDBP,KHDRBS1,YLPM1,HNRNPK,HNRNPR,DHX9,THRAP3,SART3,SAFB,HNRNPU,TP53BP1,ELAVL1,YTHDC1,NRF1,RBMX,FUBP1,DPF2,HNRNPDL,HNRNPA0,HNRNPM,BRD2,SCAF8,ERCC3,CTCF,SRSF1,HNRNPA2B1,ILF3,KDM3B,CPSF7,RANBP3,NCOA5,KDM4A,CPSF6,PHF2,ZNF740,ZMYM3,SFPQ,XRCC1,ARID1A,STRIP1,EPC2,ZMYM4,HNRNPL,PUM2,ZBTB49,FUBP3,IWS1,RBM15B,SMARCA5,ZC3H4,SRSF10,POLDIP3,HNRNPD,FBXO11,EDC3,SF1,SUDS3,TAF1,SETD2,TFCP2,PPP1R8,HNRNPH3,AD…
GO:BP	positive regulation of telomerase RNA reverse transcriptase activity	GO:1905663	0.0498744	1.30212	2	91	2	18123	HNRNPA2B1,HNRNPD
GO:CC	nucleoplasm	GO:0005654	2.6382e-36	35.5787	4112	91	78	18964	UBTF,TARDBP,KHDRBS1,YLPM1,HNRNPK,HNRNPR,DHX9,THRAP3,SART3,SAFB,HNRNPU,TP53BP1,ELAVL1,YTHDC1,NRF1,RBMX,FUBP1,DPF2,HNRNPDL,HNRNPA0,HNRNPM,BRD2,SCAF8,MFAP1,ERCC3,CTCF,SRSF1,HNRNPA2B1,ILF3,KDM3B,CPSF7,RANBP3,NCOA5,KDM4A,CPSF6,PHF2,ZMYM3,PDCD7,SFPQ,EP400,XRCC1,WDR82,ARID1A,EPC2,HNRNPL,ZBTB49,IWS1,RBM15B,SMARCA5,ZC3H4,SRSF10,POLDIP3,HNRNPD,FBXO11,SF1,SUDS3,TAF1,SETD2,TFCP2,PPP1R8,HNRNPUL1,HNRNPH3,SNRNP…
GO:CC	nuclear lumen	GO:0031981	5.1245e-35	34.2903	4453	91	79	18964	UBTF,TARDBP,KHDRBS1,YLPM1,HNRNPK,HNRNPR,DHX9,THRAP3,SART3,SAFB,HNRNPU,TP53BP1,ELAVL1,YTHDC1,NRF1,RBMX,FUBP1,DPF2,HNRNPDL,HNRNPA0,HNRNPM,BRD2,SCAF8,MFAP1,ERCC3,CTCF,SRSF1,HNRNPA2B1,ILF3,KDM3B,CPSF7,RANBP3,NCOA5,KDM4A,CPSF6,PHF2,ZMYM3,PDCD7,SFPQ,EP400,XRCC1,WDR82,ARID1A,EPC2,HNRNPL,ZBTB49,IWS1,RBM15B,SMARCA5,ZC3H4,SRSF10,POLDIP3,HNRNPD,FBXO11,SF1,SUDS3,TAF1,SETD2,TFCP2,PPP1R8,HNRNPUL1,HNRNPH3,SNRNP…
GO:CC	nucleus	GO:0005634	7.91153e-29	28.1017	7607	91	88	18964	UBTF,TARDBP,KHDRBS1,YLPM1,HNRNPK,HNRNPR,DHX9,THRAP3,SART3,SAFB,HNRNPU,TP53BP1,ELAVL1,YTHDC1,NRF1,RBMX,FUBP1,DPF2,HNRNPDL,HNRNPA0,HNRNPM,BRD2,SCAF8,MFAP1,ERCC3,CTCF,SRSF1,HNRNPA2B1,ILF3,KDM3B,CPSF7,RANBP3,NCOA5,KDM4A,CPSF6,PHF2,ZNF740,ZMYM3,PDCD7,SFPQ,EP400,XRCC1,WDR82,ARID1A,STRIP1,EPC2,HNRNPL,PUM2,ZBTB49,FUBP3,IWS1,RBM15B,SMARCA5,ZC3H4,SRSF10,POLDIP3,HNRNPD,FBXO11,SF1,SUDS3,TAF1,SETD2,TFCP2,PPP1…
GO:CC	membrane-enclosed lumen	GO:0031974	1.23504e-27	26.9083	5579	91	79	18964	UBTF,TARDBP,KHDRBS1,YLPM1,HNRNPK,HNRNPR,DHX9,THRAP3,SART3,SAFB,HNRNPU,TP53BP1,ELAVL1,YTHDC1,NRF1,RBMX,FUBP1,DPF2,HNRNPDL,HNRNPA0,HNRNPM,BRD2,SCAF8,MFAP1,ERCC3,CTCF,SRSF1,HNRNPA2B1,ILF3,KDM3B,CPSF7,RANBP3,NCOA5,KDM4A,CPSF6,PHF2,ZMYM3,PDCD7,SFPQ,EP400,XRCC1,WDR82,ARID1A,EPC2,HNRNPL,ZBTB49,IWS1,RBM15B,SMARCA5,ZC3H4,SRSF10,POLDIP3,HNRNPD,FBXO11,SF1,SUDS3,TAF1,SETD2,TFCP2,PPP1R8,HNRNPUL1,HNRNPH3,SNRNP…
GO:CC	organelle lumen	GO:0043233	1.23504e-27	26.9083	5579	91	79	18964	UBTF,TARDBP,KHDRBS1,YLPM1,HNRNPK,HNRNPR,DHX9,THRAP3,SART3,SAFB,HNRNPU,TP53BP1,ELAVL1,YTHDC1,NRF1,RBMX,FUBP1,DPF2,HNRNPDL,HNRNPA0,HNRNPM,BRD2,SCAF8,MFAP1,ERCC3,CTCF,SRSF1,HNRNPA2B1,ILF3,KDM3B,CPSF7,RANBP3,NCOA5,KDM4A,CPSF6,PHF2,ZMYM3,PDCD7,SFPQ,EP400,XRCC1,WDR82,ARID1A,EPC2,HNRNPL,ZBTB49,IWS1,RBM15B,SMARCA5,ZC3H4,SRSF10,POLDIP3,HNRNPD,FBXO11,SF1,SUDS3,TAF1,SETD2,TFCP2,PPP1R8,HNRNPUL1,HNRNPH3,SNRNP…
GO:CC	intracellular organelle lumen	GO:0070013	1.23504e-27	26.9083	5579	91	79	18964	UBTF,TARDBP,KHDRBS1,YLPM1,HNRNPK,HNRNPR,DHX9,THRAP3,SART3,SAFB,HNRNPU,TP53BP1,ELAVL1,YTHDC1,NRF1,RBMX,FUBP1,DPF2,HNRNPDL,HNRNPA0,HNRNPM,BRD2,SCAF8,MFAP1,ERCC3,CTCF,SRSF1,HNRNPA2B1,ILF3,KDM3B,CPSF7,RANBP3,NCOA5,KDM4A,CPSF6,PHF2,ZMYM3,PDCD7,SFPQ,EP400,XRCC1,WDR82,ARID1A,EPC2,HNRNPL,ZBTB49,IWS1,RBM15B,SMARCA5,ZC3H4,SRSF10,POLDIP3,HNRNPD,FBXO11,SF1,SUDS3,TAF1,SETD2,TFCP2,PPP1R8,HNRNPUL1,HNRNPH3,SNRNP…
GO:CC	nuclear protein-containing complex	GO:0140513	3.08268e-20	19.5111	1236	91	39	18964	HNRNPK,HNRNPR,THRAP3,SART3,HNRNPU,RBMX,DPF2,HNRNPDL,HNRNPM,SCAF8,MFAP1,ERCC3,SRSF1,HNRNPA2B1,KDM3B,CPSF7,RANBP3,CPSF6,PDCD7,SFPQ,EP400,XRCC1,WDR82,ARID1A,EPC2,SMARCA5,SF1,SUDS3,TAF1,PPP1R8,HNRNPH3,ADNP,SNRNP200,SMARCAL1,SNW1,SMARCC2,BCLAF1,LDB1,ARID1B
GO:CC	intracellular membrane-bounded organelle	GO:0043231	4.71253e-13	12.3267	12046	91	89	18964	UBTF,TARDBP,KHDRBS1,YLPM1,HNRNPK,HNRNPR,DHX9,THRAP3,SART3,SAFB,HNRNPU,TP53BP1,ELAVL1,YTHDC1,NRF1,RBMX,FUBP1,DPF2,HNRNPDL,HNRNPA0,HNRNPM,BRD2,SCAF8,MFAP1,ERCC3,CTCF,SRSF1,HNRNPA2B1,ILF3,KDM3B,CPSF7,RANBP3,NCOA5,KDM4A,CPSF6,PHF2,ZNF740,ZMYM3,PDCD7,SFPQ,EP400,XRCC1,WDR82,ARID1A,STRIP1,EPC2,HNRNPL,PUM2,ZBTB49,FUBP3,IWS1,RBM15B,SMARCA5,ZC3H4,SRSF10,POLDIP3,HNRNPD,DNAJC14,FBXO11,SF1,SUDS3,TAF1,SETD2,TF…
GO:CC	intracellular organelle	GO:0043229	7.90657e-13	12.102	13117	91	91	18964	UBTF,TARDBP,KHDRBS1,YLPM1,HNRNPK,HNRNPR,DHX9,THRAP3,SART3,SAFB,HNRNPU,TP53BP1,ELAVL1,YTHDC1,NRF1,RBMX,FUBP1,DPF2,HNRNPDL,HNRNPA0,HNRNPM,BRD2,SCAF8,MFAP1,ERCC3,CTCF,SRSF1,HNRNPA2B1,ILF3,KDM3B,CPSF7,RANBP3,NCOA5,KDM4A,CPSF6,PHF2,ZNF740,ZMYM3,PDCD7,SFPQ,EP400,XRCC1,WDR82,ARID1A,STRIP1,EPC2,HNRNPL,PUM2,ZBTB49,FUBP3,IWS1,RBM15B,SMARCA5,ZC3H4,SRSF10,POLDIP3,HNRNPD,DNAJC14,FBXO11,WDR92,EDC3,SF1,SUDS3,TA…
GO:CC	spliceosomal complex	GO:0005681	6.25863e-12	11.2035	192	91	15	18964	HNRNPK,HNRNPR,HNRNPU,RBMX,HNRNPDL,HNRNPM,MFAP1,SRSF1,HNRNPA2B1,PDCD7,SF1,PPP1R8,HNRNPH3,SNRNP200,SNW1
GO:CC	nuclear body	GO:0016604	1.69214e-11	10.7716	816	91	25	18964	TARDBP,YLPM1,DHX9,THRAP3,SART3,HNRNPU,TP53BP1,YTHDC1,HNRNPM,BRD2,SRSF1,HNRNPA2B1,CPSF6,SFPQ,EP400,RBM15B,SRSF10,POLDIP3,SF1,SUDS3,PPP1R8,SNW1,ELF2,SRSF3,BCLAF1
GO:CC	nuclear speck	GO:0016607	2.98783e-10	9.52464	413	91	18	18964	TARDBP,YLPM1,THRAP3,SART3,HNRNPU,YTHDC1,BRD2,SRSF1,CPSF6,SFPQ,EP400,RBM15B,SRSF10,POLDIP3,PPP1R8,SNW1,SRSF3,BCLAF1
GO:CC	organelle	GO:0043226	3.61143e-10	9.44232	14027	91	91	18964	UBTF,TARDBP,KHDRBS1,YLPM1,HNRNPK,HNRNPR,DHX9,THRAP3,SART3,SAFB,HNRNPU,TP53BP1,ELAVL1,YTHDC1,NRF1,RBMX,FUBP1,DPF2,HNRNPDL,HNRNPA0,HNRNPM,BRD2,SCAF8,MFAP1,ERCC3,CTCF,SRSF1,HNRNPA2B1,ILF3,KDM3B,CPSF7,RANBP3,NCOA5,KDM4A,CPSF6,PHF2,ZNF740,ZMYM3,PDCD7,SFPQ,EP400,XRCC1,WDR82,ARID1A,STRIP1,EPC2,HNRNPL,PUM2,ZBTB49,FUBP3,IWS1,RBM15B,SMARCA5,ZC3H4,SRSF10,POLDIP3,HNRNPD,DNAJC14,FBXO11,WDR92,EDC3,SF1,SUDS3,TA…
GO:CC	ribonucleoprotein complex	GO:1990904	3.7706e-10	9.42359	694	91	22	18964	HNRNPK,HNRNPR,DHX9,SART3,HNRNPU,ELAVL1,RBMX,HNRNPDL,HNRNPM,MFAP1,SRSF1,HNRNPA2B1,ILF3,CPSF6,PDCD7,HNRNPL,HNRNPD,SF1,PPP1R8,HNRNPH3,SNRNP200,SNW1
GO:CC	chromosome	GO:0005694	1.1067e-09	8.95597	1795	91	33	18964	TARDBP,HNRNPK,DHX9,HNRNPU,TP53BP1,RBMX,DPF2,CTCF,HNRNPA2B1,KDM3B,KDM4A,CPSF6,PHF2,ZNF740,SFPQ,EP400,XRCC1,WDR82,ARID1A,SMARCA5,FBXO11,SUDS3,TAF1,SETD2,TFCP2,ADNP,SMARCAL1,SNW1,ELF2,SMARCC2,LDB1,ARID1B,RNF20
GO:CC	membrane-bounded organelle	GO:0043227	1.17829e-09	8.92875	13201	91	89	18964	UBTF,TARDBP,KHDRBS1,YLPM1,HNRNPK,HNRNPR,DHX9,THRAP3,SART3,SAFB,HNRNPU,TP53BP1,ELAVL1,YTHDC1,NRF1,RBMX,FUBP1,DPF2,HNRNPDL,HNRNPA0,HNRNPM,BRD2,SCAF8,MFAP1,ERCC3,CTCF,SRSF1,HNRNPA2B1,ILF3,KDM3B,CPSF7,RANBP3,NCOA5,KDM4A,CPSF6,PHF2,ZNF740,ZMYM3,PDCD7,SFPQ,EP400,XRCC1,WDR82,ARID1A,STRIP1,EPC2,HNRNPL,PUM2,ZBTB49,FUBP3,IWS1,RBM15B,SMARCA5,ZC3H4,SRSF10,POLDIP3,HNRNPD,DNAJC14,FBXO11,SF1,SUDS3,TAF1,SETD2,TF…
GO:CC	intracellular anatomical structure	GO:0005622	5.07891e-08	7.29423	14808	91	91	18964	UBTF,TARDBP,KHDRBS1,YLPM1,HNRNPK,HNRNPR,DHX9,THRAP3,SART3,SAFB,HNRNPU,TP53BP1,ELAVL1,YTHDC1,NRF1,RBMX,FUBP1,DPF2,HNRNPDL,HNRNPA0,HNRNPM,BRD2,SCAF8,MFAP1,ERCC3,CTCF,SRSF1,HNRNPA2B1,ILF3,KDM3B,CPSF7,RANBP3,NCOA5,KDM4A,CPSF6,PHF2,ZNF740,ZMYM3,PDCD7,SFPQ,EP400,XRCC1,WDR82,ARID1A,STRIP1,EPC2,HNRNPL,PUM2,ZBTB49,FUBP3,IWS1,RBM15B,SMARCA5,ZC3H4,SRSF10,POLDIP3,HNRNPD,DNAJC14,FBXO11,WDR92,EDC3,SF1,SUDS3,TA…
GO:CC	catalytic step 2 spliceosome	GO:0071013	8.86874e-08	7.05214	85	91	9	18964	HNRNPK,HNRNPR,HNRNPU,RBMX,HNRNPM,SRSF1,HNRNPA2B1,SNRNP200,SNW1
GO:CC	chromatin	GO:0000785	1.39128e-07	6.85659	1235	91	25	18964	TARDBP,HNRNPK,DHX9,RBMX,DPF2,KDM3B,KDM4A,CPSF6,ZNF740,SFPQ,EP400,XRCC1,WDR82,ARID1A,SMARCA5,SUDS3,TAF1,TFCP2,ADNP,SNW1,ELF2,SMARCC2,LDB1,ARID1B,RNF20
GO:CC	intracellular non-membrane-bounded organelle	GO:0043232	4.50812e-05	4.346	5094	91	48	18964	UBTF,TARDBP,HNRNPK,DHX9,HNRNPU,TP53BP1,ELAVL1,RBMX,DPF2,HNRNPM,MFAP1,CTCF,HNRNPA2B1,ILF3,KDM3B,NCOA5,KDM4A,CPSF6,PHF2,ZNF740,SFPQ,EP400,XRCC1,WDR82,ARID1A,HNRNPL,PUM2,ZBTB49,SMARCA5,POLDIP3,FBXO11,WDR92,EDC3,SF1,SUDS3,TAF1,SETD2,TFCP2,ADNP,SMARCAL1,SNW1,ELF2,DDX50,SMARCC2,LDB1,EWSR1,ARID1B,RNF20
GO:CC	non-membrane-bounded organelle	GO:0043228	4.74776e-05	4.32351	5102	91	48	18964	UBTF,TARDBP,HNRNPK,DHX9,HNRNPU,TP53BP1,ELAVL1,RBMX,DPF2,HNRNPM,MFAP1,CTCF,HNRNPA2B1,ILF3,KDM3B,NCOA5,KDM4A,CPSF6,PHF2,ZNF740,SFPQ,EP400,XRCC1,WDR82,ARID1A,HNRNPL,PUM2,ZBTB49,SMARCA5,POLDIP3,FBXO11,WDR92,EDC3,SF1,SUDS3,TAF1,SETD2,TFCP2,ADNP,SMARCAL1,SNW1,ELF2,DDX50,SMARCC2,LDB1,EWSR1,ARID1B,RNF20
GO:CC	protein-containing complex	GO:0032991	7.98736e-05	4.0976	5541	91	50	18964	KHDRBS1,HNRNPK,HNRNPR,DHX9,THRAP3,SART3,HNRNPU,TP53BP1,ELAVL1,RBMX,DPF2,HNRNPDL,HNRNPM,SCAF8,MFAP1,ERCC3,SRSF1,HNRNPA2B1,ILF3,KDM3B,CPSF7,RANBP3,CPSF6,PDCD7,SFPQ,EP400,XRCC1,WDR82,ARID1A,EPC2,HNRNPL,RBM15B,SMARCA5,HNRNPD,FBXO11,SF1,SUDS3,TAF1,TFCP2,PPP1R8,HNRNPH3,ADNP,SNRNP200,SMARCAL1,SNW1,SMARCC2,BCLAF1,LDB1,ARID1B,RNF20
GO:CC	nBAF complex	GO:0071565	0.000209791	3.67821	15	91	4	18964	DPF2,ARID1A,SMARCC2,ARID1B
GO:CC	perichromatin fibrils	GO:0005726	0.000342423	3.46544	5	91	3	18964	TARDBP,DHX9,CPSF6
GO:CC	paraspeckles	GO:0042382	0.000342423	3.46544	5	91	3	18964	HNRNPM,CPSF6,SFPQ
GO:CC	SWI/SNF superfamily-type complex	GO:0070603	0.000699274	3.15535	79	91	6	18964	DPF2,EP400,ARID1A,SMARCA5,SMARCC2,ARID1B
GO:CC	ribonucleoprotein granule	GO:0035770	0.00109684	2.95986	252	91	9	18964	TARDBP,HNRNPK,DHX9,HNRNPU,ELAVL1,HNRNPL,PUM2,POLDIP3,EDC3
GO:CC	catalytic complex	GO:1902494	0.00209245	2.67934	1377	91	20	18964	HNRNPK,HNRNPR,DHX9,HNRNPU,RBMX,HNRNPM,ERCC3,SRSF1,HNRNPA2B1,KDM3B,EP400,WDR82,EPC2,RBM15B,FBXO11,SUDS3,TAF1,SNRNP200,SNW1,RNF20
GO:CC	nuclear matrix	GO:0016363	0.0047839	2.32022	110	91	6	18964	HNRNPU,HNRNPM,SCAF8,HNRNPA2B1,SFPQ,SNW1
GO:CC	nuclear chromosome	GO:0000228	0.0059386	2.22632	237	91	8	18964	TARDBP,DHX9,HNRNPU,CPSF6,EP400,SMARCA5,SUDS3,SMARCAL1
GO:CC	cytoplasmic ribonucleoprotein granule	GO:0036464	0.00612128	2.21316	238	91	8	18964	TARDBP,HNRNPK,DHX9,HNRNPU,ELAVL1,PUM2,POLDIP3,EDC3
GO:CC	ATPase complex	GO:1904949	0.00616521	2.21005	115	91	6	18964	DPF2,EP400,ARID1A,SMARCA5,SMARCC2,ARID1B
GO:CC	nuclear periphery	GO:0034399	0.0134408	1.87157	132	91	6	18964	HNRNPU,HNRNPM,SCAF8,HNRNPA2B1,SFPQ,SNW1
GO:CC	nucleolus	GO:0005730	0.0148467	1.82837	955	91	15	18964	UBTF,DHX9,HNRNPM,CTCF,ILF3,KDM4A,PHF2,XRCC1,WDR82,SMARCA5,FBXO11,TAF1,DDX50,EWSR1,RNF20
GO:CC	brahma complex	GO:0035060	0.0219708	1.65815	3	91	2	18964	ARID1A,ARID1B
GO:CC	SWI/SNF complex	GO:0016514	0.0316024	1.50028	19	91	3	18964	ARID1A,SMARCC2,ARID1B

## Sheet: 100 Worse GO
source	term_name	term_id	adjusted_p_value	negative_log10_of_adjusted_p_value	term_size	query_size	intersection_size	effective_domain_size	intersections
GO:MF	microtubule binding	GO:0008017	1.64851e-12	11.7829	273	96	18	18679	RACGAP1,KIF4A,NUSAP1,KIF11,KIF23,TPX2,KIF2C,GTSE1,DLGAP5,PRC1,KIFC1,PLK1,KIF18A,KIF15,SKA1,KIF18B,KIF14,KIF20A
GO:MF	ATP binding	GO:0005524	2.00551e-11	10.6978	1500	96	34	18679	MCM6,BUB1B,KIF4A,KIF11,BUB1,CHEK1,KIF23,ORC1,PLK4,RFC5,RAD51,KIF2C,CDK1,UBE2T,KIFC1,XRCC2,TTK,PLK1,KIF18A,KIF15,KIF18B,ATAD5,MCM2,CDK2,CDC7,KIF14,ERCC6L,DNA2,NEK2,MELK,MCM8,KIF20A,RFC2,RRM1
GO:MF	tubulin binding	GO:0015631	4.1332e-11	10.3837	381	96	19	18679	RACGAP1,KIF4A,NUSAP1,KIF11,KIF23,TPX2,KIF2C,GTSE1,DLGAP5,PRC1,KIFC1,BRCA1,PLK1,KIF18A,KIF15,SKA1,KIF18B,KIF14,KIF20A
GO:MF	adenyl ribonucleotide binding	GO:0032559	6.74341e-11	10.1711	1564	96	34	18679	MCM6,BUB1B,KIF4A,KIF11,BUB1,CHEK1,KIF23,ORC1,PLK4,RFC5,RAD51,KIF2C,CDK1,UBE2T,KIFC1,XRCC2,TTK,PLK1,KIF18A,KIF15,KIF18B,ATAD5,MCM2,CDK2,CDC7,KIF14,ERCC6L,DNA2,NEK2,MELK,MCM8,KIF20A,RFC2,RRM1
GO:MF	adenyl nucleotide binding	GO:0030554	8.56368e-11	10.0673	1577	96	34	18679	MCM6,BUB1B,KIF4A,KIF11,BUB1,CHEK1,KIF23,ORC1,PLK4,RFC5,RAD51,KIF2C,CDK1,UBE2T,KIFC1,XRCC2,TTK,PLK1,KIF18A,KIF15,KIF18B,ATAD5,MCM2,CDK2,CDC7,KIF14,ERCC6L,DNA2,NEK2,MELK,MCM8,KIF20A,RFC2,RRM1
GO:MF	ATP-dependent microtubule motor activity	GO:1990939	3.06974e-10	9.5129	60	96	10	18679	KIF4A,KIF11,KIF23,KIF2C,KIFC1,KIF18A,KIF15,KIF18B,KIF14,KIF20A
GO:MF	ATPase	GO:0016887	3.41183e-10	9.46701	553	96	21	18679	MCM6,KIF4A,KIF11,KIF23,ORC1,RFC5,RAD51,KIF2C,KIFC1,XRCC2,KIF18A,KIF15,KIF18B,ATAD5,MCM2,KIF14,ERCC6L,DNA2,MCM8,KIF20A,RFC2
GO:MF	microtubule motor activity	GO:0003777	9.80482e-10	9.00856	67	96	10	18679	KIF4A,KIF11,KIF23,KIF2C,KIFC1,KIF18A,KIF15,KIF18B,KIF14,KIF20A
GO:MF	purine ribonucleoside triphosphate binding	GO:0035639	7.40266e-09	8.13061	1846	96	34	18679	MCM6,BUB1B,KIF4A,KIF11,BUB1,CHEK1,KIF23,ORC1,PLK4,RFC5,RAD51,KIF2C,CDK1,UBE2T,KIFC1,XRCC2,TTK,PLK1,KIF18A,KIF15,KIF18B,ATAD5,MCM2,CDK2,CDC7,KIF14,ERCC6L,DNA2,NEK2,MELK,MCM8,KIF20A,RFC2,RRM1
GO:MF	purine ribonucleotide binding	GO:0032555	2.09885e-08	7.67802	1917	96	34	18679	MCM6,BUB1B,KIF4A,KIF11,BUB1,CHEK1,KIF23,ORC1,PLK4,RFC5,RAD51,KIF2C,CDK1,UBE2T,KIFC1,XRCC2,TTK,PLK1,KIF18A,KIF15,KIF18B,ATAD5,MCM2,CDK2,CDC7,KIF14,ERCC6L,DNA2,NEK2,MELK,MCM8,KIF20A,RFC2,RRM1
GO:MF	purine nucleotide binding	GO:0017076	2.59931e-08	7.58514	1932	96	34	18679	MCM6,BUB1B,KIF4A,KIF11,BUB1,CHEK1,KIF23,ORC1,PLK4,RFC5,RAD51,KIF2C,CDK1,UBE2T,KIFC1,XRCC2,TTK,PLK1,KIF18A,KIF15,KIF18B,ATAD5,MCM2,CDK2,CDC7,KIF14,ERCC6L,DNA2,NEK2,MELK,MCM8,KIF20A,RFC2,RRM1
GO:MF	ribonucleotide binding	GO:0032553	2.67406e-08	7.57283	1934	96	34	18679	MCM6,BUB1B,KIF4A,KIF11,BUB1,CHEK1,KIF23,ORC1,PLK4,RFC5,RAD51,KIF2C,CDK1,UBE2T,KIFC1,XRCC2,TTK,PLK1,KIF18A,KIF15,KIF18B,ATAD5,MCM2,CDK2,CDC7,KIF14,ERCC6L,DNA2,NEK2,MELK,MCM8,KIF20A,RFC2,RRM1
GO:MF	protein binding	GO:0005515	9.44622e-08	7.02474	14767	96	96	18679	RACGAP1,MCM6,BUB1B,SPC25,KIF4A,NUSAP1,KIF11,BUB1,NCAPH,CENPO,CHEK1,TIMELESS,KIF23,NCAPG,FANCI,LMNB1,PCNA,CCNB2,HJURP,NCAPG2,ORC1,PLK4,TPX2,ZWILCH,CENPI,RFC5,TMPO,PARPBP,OIP5,RAD51,CDCA5,KIF2C,GTSE1,CENPK,DLGAP5,CDK1,ZWINT,UHRF1,FEN1,UBE2T,WDHD1,PRC1,MAD2L1,KIFC1,EXO1,XRCC2,SRSF7,PRIM1,TTK,ASF1B,SRSF2,BRCA1,EZH2,FBXO5,CCNA2,PLK1,KIF18A,KIF15,ORC6,RQCD1,SKA1,CENPA,CCNB1,KIF18B,CENPL,ATAD5,SRSF3,MCM…
GO:MF	nucleotide binding	GO:0000166	1.45491e-07	6.83716	2176	96	35	18679	MCM6,BUB1B,KIF4A,KIF11,BUB1,CHEK1,KIF23,ORC1,PLK4,RFC5,RAD51,KIF2C,CDK1,UHRF1,UBE2T,KIFC1,XRCC2,TTK,PLK1,KIF18A,KIF15,KIF18B,ATAD5,MCM2,CDK2,CDC7,KIF14,ERCC6L,DNA2,NEK2,MELK,MCM8,KIF20A,RFC2,RRM1
GO:MF	nucleoside phosphate binding	GO:1901265	1.47343e-07	6.83167	2177	96	35	18679	MCM6,BUB1B,KIF4A,KIF11,BUB1,CHEK1,KIF23,ORC1,PLK4,RFC5,RAD51,KIF2C,CDK1,UHRF1,UBE2T,KIFC1,XRCC2,TTK,PLK1,KIF18A,KIF15,KIF18B,ATAD5,MCM2,CDK2,CDC7,KIF14,ERCC6L,DNA2,NEK2,MELK,MCM8,KIF20A,RFC2,RRM1
GO:MF	single-stranded DNA helicase activity	GO:0017116	2.55929e-07	6.59188	19	96	6	18679	MCM6,RFC5,RAD51,MCM2,DNA2,RFC2
GO:MF	motor activity	GO:0003774	2.62508e-07	6.58086	116	96	10	18679	KIF4A,KIF11,KIF23,KIF2C,KIFC1,KIF18A,KIF15,KIF18B,KIF14,KIF20A
GO:MF	carbohydrate derivative binding	GO:0097367	2.21848e-06	5.65394	2282	96	34	18679	MCM6,BUB1B,KIF4A,KIF11,BUB1,CHEK1,KIF23,ORC1,PLK4,RFC5,RAD51,KIF2C,CDK1,UBE2T,KIFC1,XRCC2,TTK,PLK1,KIF18A,KIF15,KIF18B,ATAD5,MCM2,CDK2,CDC7,KIF14,ERCC6L,DNA2,NEK2,MELK,MCM8,KIF20A,RFC2,RRM1
GO:MF	anion binding	GO:0043168	2.38524e-06	5.62247	2413	96	35	18679	RACGAP1,MCM6,BUB1B,KIF4A,KIF11,BUB1,CHEK1,KIF23,ORC1,PLK4,RFC5,RAD51,KIF2C,CDK1,UBE2T,KIFC1,XRCC2,TTK,PLK1,KIF18A,KIF15,KIF18B,ATAD5,MCM2,CDK2,CDC7,KIF14,ERCC6L,DNA2,NEK2,MELK,MCM8,KIF20A,RFC2,RRM1
GO:MF	catalytic activity, acting on DNA	GO:0140097	2.7191e-06	5.56557	299	96	13	18679	MCM6,PCNA,RFC5,RAD51,FEN1,EXO1,XRCC2,ATAD5,MCM2,ERCC6L,DNA2,MCM8,RFC2
GO:MF	DNA helicase activity	GO:0003678	3.24129e-06	5.48928	76	96	8	18679	MCM6,RFC5,RAD51,MCM2,ERCC6L,DNA2,MCM8,RFC2
GO:MF	small molecule binding	GO:0036094	7.17307e-06	5.14429	2516	96	35	18679	MCM6,BUB1B,KIF4A,KIF11,BUB1,CHEK1,KIF23,ORC1,PLK4,RFC5,RAD51,KIF2C,CDK1,UHRF1,UBE2T,KIFC1,XRCC2,TTK,PLK1,KIF18A,KIF15,KIF18B,ATAD5,MCM2,CDK2,CDC7,KIF14,ERCC6L,DNA2,NEK2,MELK,MCM8,KIF20A,RFC2,RRM1
GO:MF	enzyme binding	GO:0019899	1.00324e-05	4.9986	2048	96	31	18679	RACGAP1,KIF11,NCAPH,FANCI,LMNB1,PCNA,TPX2,RFC5,RAD51,UBE2T,PRC1,SRSF2,BRCA1,FBXO5,CCNA2,PLK1,RQCD1,CCNB1,SRSF3,MCM2,SGOL1,KIF14,NEK2,MCM8,KIF20A,CDC25C,ECT2,RFC2,WDR76,SPDL1,MCM10
GO:MF	ATPase, acting on DNA	GO:0008094	2.43269e-05	4.61391	185	96	10	18679	MCM6,RFC5,RAD51,XRCC2,ATAD5,MCM2,ERCC6L,DNA2,MCM8,RFC2
GO:MF	heterocyclic compound binding	GO:1901363	2.67676e-05	4.57239	6210	96	58	18679	MCM6,BUB1B,KIF4A,NUSAP1,KIF11,BUB1,CHEK1,TIMELESS,KIF23,FANCI,LMNB1,PCNA,HJURP,ORC1,PLK4,RFC5,TMPO,PARPBP,RAD51,KIF2C,CDK1,UHRF1,FEN1,UBE2T,WDHD1,KIFC1,EXO1,XRCC2,SRSF7,TTK,SRSF2,BRCA1,EZH2,PLK1,KIF18A,KIF15,ORC6,CENPA,KIF18B,ATAD5,SRSF3,MCM2,CDK2,CDC7,KIF14,CLSPN,ERCC6L,POLA2,DNA2,TRA2B,NEK2,MELK,MCM8,KIF20A,RFC2,RRM1,WDR76,MCM10
GO:MF	organic cyclic compound binding	GO:0097159	4.48381e-05	4.34835	6291	96	58	18679	MCM6,BUB1B,KIF4A,NUSAP1,KIF11,BUB1,CHEK1,TIMELESS,KIF23,FANCI,LMNB1,PCNA,HJURP,ORC1,PLK4,RFC5,TMPO,PARPBP,RAD51,KIF2C,CDK1,UHRF1,FEN1,UBE2T,WDHD1,KIFC1,EXO1,XRCC2,SRSF7,TTK,SRSF2,BRCA1,EZH2,PLK1,KIF18A,KIF15,ORC6,CENPA,KIF18B,ATAD5,SRSF3,MCM2,CDK2,CDC7,KIF14,CLSPN,ERCC6L,POLA2,DNA2,TRA2B,NEK2,MELK,MCM8,KIF20A,RFC2,RRM1,WDR76,MCM10
GO:MF	DNA replication origin binding	GO:0003688	6.38826e-05	4.19462	23	96	5	18679	MCM6,ORC1,MCM2,MCM8,MCM10
GO:MF	DNA binding	GO:0003677	7.26842e-05	4.13856	2488	96	33	18679	MCM6,KIF4A,NUSAP1,TIMELESS,FANCI,LMNB1,PCNA,HJURP,ORC1,RFC5,TMPO,PARPBP,RAD51,KIF2C,UHRF1,FEN1,WDHD1,EXO1,XRCC2,BRCA1,EZH2,ORC6,CENPA,ATAD5,MCM2,CLSPN,ERCC6L,POLA2,DNA2,MCM8,RFC2,WDR76,MCM10
GO:MF	cytoskeletal protein binding	GO:0008092	0.000420795	3.37593	1001	96	19	18679	RACGAP1,KIF4A,NUSAP1,KIF11,KIF23,TPX2,KIF2C,GTSE1,DLGAP5,PRC1,KIFC1,BRCA1,PLK1,KIF18A,KIF15,SKA1,KIF18B,KIF14,KIF20A
GO:MF	ATP-dependent microtubule motor activity, plus-end-directed	GO:0008574	0.000937502	3.02803	17	96	4	18679	KIF11,KIF18A,KIF18B,KIF14
GO:MF	helicase activity	GO:0004386	0.00123872	2.90703	163	96	8	18679	MCM6,RFC5,RAD51,MCM2,ERCC6L,DNA2,MCM8,RFC2
GO:MF	protein serine kinase activity	GO:0106310	0.00155303	2.80882	361	96	11	18679	BUB1B,BUB1,CHEK1,PLK4,CDK1,TTK,PLK1,CDK2,CDC7,NEK2,MELK
GO:MF	protein threonine kinase activity	GO:0106311	0.00155303	2.80882	361	96	11	18679	BUB1B,BUB1,CHEK1,PLK4,CDK1,TTK,PLK1,CDK2,CDC7,NEK2,MELK
GO:MF	kinetochore binding	GO:0043515	0.00164676	2.78337	6	96	3	18679	TTK,CENPH,SPDL1
GO:MF	kinase binding	GO:0019900	0.00442941	2.35365	757	96	15	18679	RACGAP1,KIF11,PCNA,TPX2,PRC1,SRSF2,FBXO5,CCNA2,PLK1,RQCD1,CCNB1,SGOL1,KIF14,KIF20A,CDC25C
GO:MF	anaphase-promoting complex binding	GO:0010997	0.00457658	2.33946	8	96	3	18679	FBXO5,PLK1,CLSPN
GO:MF	5'-flap endonuclease activity	GO:0017108	0.00683925	2.16499	9	96	3	18679	FEN1,EXO1,DNA2
GO:MF	protein serine/threonine kinase activity	GO:0004674	0.00968121	2.01407	438	96	11	18679	BUB1B,BUB1,CHEK1,PLK4,CDK1,TTK,PLK1,CDK2,CDC7,NEK2,MELK
GO:MF	flap endonuclease activity	GO:0048256	0.00973392	2.01171	10	96	3	18679	FEN1,EXO1,DNA2
GO:MF	chromatin binding	GO:0003682	0.0234136	1.63053	573	96	12	18679	NCAPH,PCNA,ORC1,RAD51,CDCA5,UHRF1,UBE2T,WDHD1,EXO1,EZH2,CENPA,MCM8
GO:MF	protein kinase binding	GO:0019901	0.026638	1.5745	677	96	13	18679	RACGAP1,KIF11,PCNA,TPX2,PRC1,SRSF2,FBXO5,CCNA2,PLK1,CCNB1,KIF14,KIF20A,CDC25C
GO:MF	nucleoside-triphosphatase activity	GO:0017111	0.0409496	1.38775	424	96	10	18679	KIF4A,KIF11,KIF23,KIF2C,KIFC1,KIF18A,KIF15,KIF18B,KIF14,KIF20A
GO:MF	histone kinase activity	GO:0035173	0.0444185	1.35244	16	96	3	18679	CHEK1,CDK1,CDK2
GO:BP	cell cycle	GO:0007049	1.96157e-72	71.7074	1867	96	87	18123	RACGAP1,MCM6,BUB1B,SPC25,KIF4A,NUSAP1,KIF11,BUB1,NCAPH,CENPO,CHEK1,GINS1,TIMELESS,KIF23,NCAPG,FANCI,PCNA,CCNB2,HJURP,NCAPG2,ORC1,PLK4,TPX2,ZWILCH,CENPI,RFC5,OIP5,RAD51,CDCA5,KIF2C,GTSE1,CENPK,DLGAP5,CDK1,ZWINT,UHRF1,FEN1,WDHD1,PRC1,MAD2L1,KIFC1,EXO1,XRCC2,PRIM1,TTK,SRSF2,BRCA1,EZH2,FBXO5,CCNA2,PLK1,KIF18A,KIF15,RQCD1,SKA1,CENPA,CCNB1,KIF18B,CENPL,ATAD5,MCM2,SGOL1,CDK2,INCENP,CDC7,KIF14,CENPH,CLSP…
GO:BP	cell cycle process	GO:0022402	4.02284e-65	64.3955	1388	96	77	18123	RACGAP1,MCM6,BUB1B,SPC25,KIF4A,NUSAP1,KIF11,BUB1,NCAPH,CENPO,CHEK1,GINS1,TIMELESS,KIF23,NCAPG,PCNA,CCNB2,NCAPG2,ORC1,PLK4,TPX2,ZWILCH,CENPI,RFC5,RAD51,CDCA5,KIF2C,GTSE1,CENPK,DLGAP5,CDK1,ZWINT,FEN1,PRC1,MAD2L1,KIFC1,XRCC2,PRIM1,TTK,BRCA1,EZH2,FBXO5,CCNA2,PLK1,KIF18A,RQCD1,SKA1,CENPA,CCNB1,KIF18B,CENPL,ATAD5,MCM2,SGOL1,CDK2,INCENP,CDC7,KIF14,CENPH,CLSPN,ERCC6L,POLA2,CCNF,DTL,DNA2,SASS6,NEK2,MELK,K…
GO:BP	mitotic cell cycle	GO:0000278	1.27086e-62	61.8959	1098	96	71	18123	RACGAP1,MCM6,BUB1B,SPC25,KIF4A,NUSAP1,KIF11,BUB1,NCAPH,CENPO,CHEK1,GINS1,KIF23,NCAPG,PCNA,CCNB2,NCAPG2,ORC1,PLK4,TPX2,ZWILCH,CENPI,RAD51,CDCA5,KIF2C,GTSE1,CENPK,DLGAP5,CDK1,ZWINT,WDHD1,PRC1,MAD2L1,KIFC1,XRCC2,TTK,SRSF2,BRCA1,EZH2,FBXO5,CCNA2,PLK1,KIF18A,KIF15,RQCD1,SKA1,CENPA,CCNB1,KIF18B,CENPL,MCM2,SGOL1,CDK2,INCENP,CDC7,KIF14,CENPH,CLSPN,ERCC6L,CCNF,DTL,DNA2,NEK2,MELK,KIF20A,CDC25C,CEP78,ECT2,R…
GO:BP	mitotic cell cycle process	GO:1903047	1.44807e-58	57.8392	956	96	66	18123	RACGAP1,MCM6,BUB1B,SPC25,KIF4A,NUSAP1,KIF11,BUB1,NCAPH,CENPO,CHEK1,GINS1,KIF23,NCAPG,PCNA,CCNB2,NCAPG2,ORC1,PLK4,TPX2,ZWILCH,CENPI,RAD51,CDCA5,KIF2C,GTSE1,CENPK,DLGAP5,CDK1,ZWINT,PRC1,MAD2L1,KIFC1,TTK,BRCA1,EZH2,FBXO5,CCNA2,PLK1,KIF18A,RQCD1,SKA1,CENPA,CCNB1,KIF18B,CENPL,MCM2,SGOL1,CDK2,INCENP,CDC7,KIF14,CENPH,CLSPN,ERCC6L,CCNF,DTL,DNA2,NEK2,MELK,KIF20A,CDC25C,CEP78,ECT2,RFWD3,SPDL1
GO:BP	chromosome organization	GO:0051276	7.17528e-38	37.1442	1270	96	57	18123	RACGAP1,MCM6,BUB1B,KIF4A,NUSAP1,BUB1,NCAPH,CENPO,CHEK1,KIF23,NCAPG,PCNA,HJURP,NCAPG2,CENPI,RFC5,OIP5,RAD51,CDCA5,KIF2C,CENPK,DLGAP5,CDK1,ZWINT,UHRF1,FEN1,PRC1,MAD2L1,KIFC1,EXO1,PRIM1,TTK,ASF1B,BRCA1,EZH2,FBXO5,CCNA2,PLK1,KIF18A,CENPA,CCNB1,KIF18B,CENPL,MCM2,SGOL1,CDK2,INCENP,KIF14,CENPH,ERCC6L,POLA2,DNA2,NEK2,MCM8,RFC2,RFWD3,SPDL1
GO:BP	cell division	GO:0051301	8.7323e-37	36.0589	630	96	45	18123	RACGAP1,BUB1B,SPC25,KIF4A,NUSAP1,KIF11,BUB1,NCAPH,TIMELESS,KIF23,NCAPG,CCNB2,NCAPG2,PLK4,TPX2,ZWILCH,OIP5,CDCA5,KIF2C,CDK1,ZWINT,PRC1,MAD2L1,KIFC1,FBXO5,CCNA2,PLK1,ORC6,SKA1,CENPA,CCNB1,KIF18B,SGOL1,CDK2,INCENP,CDC7,KIF14,ERCC6L,CCNF,NEK2,KIF20A,CDC25C,ASPM,ECT2,SPDL1
GO:BP	microtubule cytoskeleton organization	GO:0000226	8.58264e-36	35.0664	663	96	45	18123	RACGAP1,BUB1B,SPC25,KIF4A,NUSAP1,KIF11,BUB1,CENPO,CHEK1,KIF23,CCNB2,PLK4,TPX2,ZWILCH,CENPI,KIF2C,CENPK,DLGAP5,CDK1,ZWINT,PRC1,MAD2L1,KIFC1,XRCC2,TTK,BRCA1,FBXO5,PLK1,KIF18A,SKA1,CENPA,CCNB1,KIF18B,CENPL,SGOL1,CDK2,INCENP,CENPH,ERCC6L,CCNF,SASS6,NEK2,KIF20A,ASPM,SPDL1
GO:BP	spindle organization	GO:0007051	1.18673e-35	34.9256	256	96	34	18123	RACGAP1,BUB1B,SPC25,KIF4A,KIF11,BUB1,CENPO,KIF23,CCNB2,TPX2,ZWILCH,CENPI,KIF2C,CENPK,DLGAP5,ZWINT,PRC1,MAD2L1,KIFC1,TTK,FBXO5,PLK1,KIF18A,SKA1,CENPA,CCNB1,CENPL,SGOL1,INCENP,CENPH,ERCC6L,NEK2,ASPM,SPDL1
GO:BP	chromosome segregation	GO:0007059	2.5537e-35	34.5928	353	96	37	18123	RACGAP1,BUB1B,SPC25,KIF4A,NUSAP1,BUB1,NCAPH,KIF23,NCAPG,HJURP,NCAPG2,OIP5,CDCA5,KIF2C,CENPK,DLGAP5,CDK1,ZWINT,FEN1,PRC1,MAD2L1,KIFC1,TTK,BRCA1,FBXO5,PLK1,KIF18A,SKA1,CCNB1,KIF18B,SGOL1,INCENP,KIF14,CENPH,NEK2,ECT2,SPDL1
GO:BP	microtubule cytoskeleton organization involved in mitosis	GO:1902850	5.17049e-35	34.2865	214	96	32	18123	RACGAP1,BUB1B,SPC25,KIF4A,NUSAP1,KIF11,BUB1,CENPO,KIF23,TPX2,ZWILCH,CENPI,KIF2C,CENPK,DLGAP5,ZWINT,PRC1,MAD2L1,KIFC1,TTK,PLK1,KIF18A,SKA1,CENPA,CCNB1,CENPL,SGOL1,INCENP,CENPH,ERCC6L,NEK2,SPDL1
GO:BP	mitotic spindle organization	GO:0007052	9.92257e-35	34.0034	194	96	31	18123	RACGAP1,BUB1B,SPC25,KIF4A,KIF11,BUB1,CENPO,KIF23,TPX2,ZWILCH,CENPI,KIF2C,CENPK,DLGAP5,ZWINT,PRC1,MAD2L1,KIFC1,TTK,PLK1,KIF18A,SKA1,CENPA,CCNB1,CENPL,SGOL1,INCENP,CENPH,ERCC6L,NEK2,SPDL1
GO:BP	microtubule-based process	GO:0007017	3.59889e-33	32.4438	927	96	48	18123	RACGAP1,BUB1B,SPC25,KIF4A,NUSAP1,KIF11,BUB1,CENPO,CHEK1,KIF23,CCNB2,PLK4,TPX2,ZWILCH,CENPI,KIF2C,GTSE1,CENPK,DLGAP5,CDK1,ZWINT,PRC1,MAD2L1,KIFC1,XRCC2,TTK,BRCA1,FBXO5,PLK1,KIF18A,KIF15,SKA1,CENPA,CCNB1,KIF18B,CENPL,SGOL1,CDK2,INCENP,KIF14,CENPH,ERCC6L,CCNF,SASS6,NEK2,KIF20A,ASPM,SPDL1
GO:BP	regulation of cell cycle process	GO:0010564	3.96005e-33	32.4023	815	96	46	18123	RACGAP1,BUB1B,NUSAP1,KIF11,BUB1,CHEK1,TIMELESS,KIF23,PCNA,ORC1,PLK4,TPX2,ZWILCH,RAD51,CDCA5,GTSE1,DLGAP5,CDK1,ZWINT,FEN1,PRC1,MAD2L1,TTK,BRCA1,EZH2,FBXO5,PLK1,RQCD1,CCNB1,ATAD5,CDK2,INCENP,CDC7,KIF14,CLSPN,CCNF,DTL,DNA2,NEK2,KIF20A,CDC25C,CEP78,ECT2,RFWD3,WDR76,SPDL1
GO:BP	mitotic sister chromatid segregation	GO:0000070	5.73662e-32	31.2413	185	96	29	18123	RACGAP1,BUB1B,KIF4A,NUSAP1,BUB1,NCAPH,KIF23,NCAPG,NCAPG2,CDCA5,KIF2C,CENPK,DLGAP5,CDK1,ZWINT,PRC1,MAD2L1,KIFC1,TTK,FBXO5,PLK1,KIF18A,CCNB1,KIF18B,SGOL1,INCENP,KIF14,NEK2,SPDL1
GO:BP	sister chromatid segregation	GO:0000819	1.13315e-31	30.9457	214	96	30	18123	RACGAP1,BUB1B,KIF4A,NUSAP1,BUB1,NCAPH,KIF23,NCAPG,NCAPG2,CDCA5,KIF2C,CENPK,DLGAP5,CDK1,ZWINT,FEN1,PRC1,MAD2L1,KIFC1,TTK,FBXO5,PLK1,KIF18A,CCNB1,KIF18B,SGOL1,INCENP,KIF14,NEK2,SPDL1
GO:BP	mitotic nuclear division	GO:0140014	4.55777e-31	30.3412	346	96	34	18123	RACGAP1,BUB1B,KIF4A,NUSAP1,KIF11,BUB1,NCAPH,CHEK1,KIF23,NCAPG,CCNB2,NCAPG2,TPX2,CDCA5,KIF2C,CENPK,DLGAP5,CDK1,ZWINT,PRC1,MAD2L1,KIFC1,TTK,FBXO5,PLK1,KIF18A,CCNB1,KIF18B,SGOL1,INCENP,KIF14,NEK2,CDC25C,SPDL1
GO:BP	regulation of cell cycle	GO:0051726	1.42334e-30	29.8467	1120	96	49	18123	RACGAP1,BUB1B,NUSAP1,KIF11,BUB1,CHEK1,TIMELESS,KIF23,PCNA,CCNB2,ORC1,PLK4,TPX2,ZWILCH,RAD51,CDCA5,GTSE1,DLGAP5,CDK1,ZWINT,FEN1,PRC1,MAD2L1,TTK,BRCA1,EZH2,FBXO5,CCNA2,PLK1,RQCD1,CCNB1,ATAD5,CDK2,INCENP,CDC7,KIF14,CLSPN,CCNF,DTL,DNA2,NEK2,KIF20A,CDC25C,CEP78,ASPM,ECT2,RFWD3,WDR76,SPDL1
GO:BP	nuclear chromosome segregation	GO:0098813	6.05234e-29	28.2181	293	96	31	18123	RACGAP1,BUB1B,KIF4A,NUSAP1,BUB1,NCAPH,KIF23,NCAPG,NCAPG2,CDCA5,KIF2C,CENPK,DLGAP5,CDK1,ZWINT,FEN1,PRC1,MAD2L1,KIFC1,TTK,FBXO5,PLK1,KIF18A,CCNB1,KIF18B,SGOL1,INCENP,KIF14,NEK2,ECT2,SPDL1
GO:BP	nuclear division	GO:0000280	1.83434e-28	27.7365	495	96	36	18123	RACGAP1,BUB1B,KIF4A,NUSAP1,KIF11,BUB1,NCAPH,CHEK1,KIF23,NCAPG,CCNB2,NCAPG2,TPX2,RAD51,CDCA5,KIF2C,CENPK,DLGAP5,CDK1,ZWINT,PRC1,MAD2L1,KIFC1,TTK,FBXO5,PLK1,KIF18A,CCNB1,KIF18B,SGOL1,INCENP,KIF14,NEK2,CDC25C,ASPM,SPDL1
GO:BP	cell cycle phase transition	GO:0044770	2.60537e-27	26.5841	681	96	39	18123	BUB1B,BUB1,CHEK1,TIMELESS,PCNA,CCNB2,ORC1,PLK4,TPX2,ZWILCH,CDCA5,GTSE1,DLGAP5,CDK1,ZWINT,MAD2L1,TTK,BRCA1,EZH2,FBXO5,CCNA2,PLK1,RQCD1,CCNB1,ATAD5,CDK2,CDC7,KIF14,CLSPN,CCNF,DTL,DNA2,NEK2,MELK,CDC25C,CEP78,RFWD3,WDR76,SPDL1
GO:BP	organelle fission	GO:0048285	5.25884e-27	26.2791	544	96	36	18123	RACGAP1,BUB1B,KIF4A,NUSAP1,KIF11,BUB1,NCAPH,CHEK1,KIF23,NCAPG,CCNB2,NCAPG2,TPX2,RAD51,CDCA5,KIF2C,CENPK,DLGAP5,CDK1,ZWINT,PRC1,MAD2L1,KIFC1,TTK,FBXO5,PLK1,KIF18A,CCNB1,KIF18B,SGOL1,INCENP,KIF14,NEK2,CDC25C,ASPM,SPDL1
GO:BP	regulation of cell cycle phase transition	GO:1901987	1.00517e-25	24.9978	543	96	35	18123	BUB1B,BUB1,CHEK1,TIMELESS,PCNA,ORC1,PLK4,TPX2,ZWILCH,CDCA5,GTSE1,DLGAP5,CDK1,ZWINT,MAD2L1,TTK,BRCA1,EZH2,FBXO5,PLK1,RQCD1,CCNB1,ATAD5,CDK2,CDC7,KIF14,CLSPN,DTL,DNA2,NEK2,CDC25C,CEP78,RFWD3,WDR76,SPDL1
GO:BP	DNA replication	GO:0006260	1.46908e-25	24.833	338	96	30	18123	MCM6,CHEK1,GINS1,TIMELESS,PCNA,ORC1,RFC5,RAD51,CDK1,FEN1,WDHD1,EXO1,PRIM1,BRCA1,FBXO5,CCNA2,ORC6,ATAD5,MCM2,CDK2,CDC7,CLSPN,POLA2,DTL,DNA2,MCM8,RFC2,RRM1,RFWD3,MCM10
GO:BP	organelle organization	GO:0006996	4.40494e-24	23.3561	4136	96	72	18123	RACGAP1,MCM6,BUB1B,SPC25,KIF4A,NUSAP1,KIF11,BUB1,NCAPH,CENPO,CHEK1,KIF23,NCAPG,PCNA,CCNB2,HJURP,NCAPG2,PLK4,TPX2,ZWILCH,CENPI,RFC5,OIP5,RAD51,CDCA5,KIF2C,CENPK,DLGAP5,CDK1,ZWINT,UHRF1,FEN1,PRC1,MAD2L1,KIFC1,EXO1,XRCC2,PRIM1,TTK,ASF1B,BRCA1,EZH2,FBXO5,CCNA2,PLK1,KIF18A,SKA1,CENPA,CCNB1,KIF18B,CENPL,MCM2,SGOL1,CDK2,INCENP,KIF14,CENPH,ERCC6L,POLA2,CCNF,DNA2,SASS6,NEK2,MCM8,KIF20A,CDC25C,CEP78,ASPM,E…
GO:BP	mitotic cell cycle phase transition	GO:0044772	2.73009e-23	22.5638	588	96	34	18123	BUB1B,BUB1,CHEK1,PCNA,CCNB2,ORC1,PLK4,TPX2,CDCA5,GTSE1,DLGAP5,CDK1,ZWINT,MAD2L1,TTK,BRCA1,EZH2,FBXO5,CCNA2,PLK1,RQCD1,CCNB1,CDK2,CDC7,KIF14,CLSPN,CCNF,DTL,NEK2,MELK,CDC25C,CEP78,RFWD3,SPDL1
GO:BP	negative regulation of cell cycle process	GO:0010948	4.84969e-22	21.3143	400	96	29	18123	BUB1B,BUB1,CHEK1,TIMELESS,PCNA,ORC1,ZWILCH,RAD51,GTSE1,CDK1,ZWINT,MAD2L1,TTK,BRCA1,EZH2,FBXO5,PLK1,RQCD1,CCNB1,CDK2,CDC7,CLSPN,CCNF,DNA2,NEK2,CDC25C,RFWD3,WDR76,SPDL1
GO:BP	cytoskeleton organization	GO:0007010	7.13006e-22	21.1469	1473	96	46	18123	RACGAP1,BUB1B,SPC25,KIF4A,NUSAP1,KIF11,BUB1,CENPO,CHEK1,KIF23,CCNB2,PLK4,TPX2,ZWILCH,CENPI,KIF2C,CENPK,DLGAP5,CDK1,ZWINT,PRC1,MAD2L1,KIFC1,XRCC2,TTK,BRCA1,FBXO5,PLK1,KIF18A,SKA1,CENPA,CCNB1,KIF18B,CENPL,SGOL1,CDK2,INCENP,CENPH,ERCC6L,CCNF,SASS6,NEK2,KIF20A,ASPM,ECT2,SPDL1
GO:BP	regulation of mitotic cell cycle phase transition	GO:1901990	8.95668e-22	21.0479	453	96	30	18123	BUB1B,BUB1,CHEK1,PCNA,ORC1,PLK4,TPX2,CDCA5,GTSE1,DLGAP5,CDK1,ZWINT,MAD2L1,TTK,BRCA1,EZH2,FBXO5,PLK1,RQCD1,CCNB1,CDK2,CDC7,KIF14,CLSPN,DTL,NEK2,CDC25C,CEP78,RFWD3,SPDL1
GO:BP	cell cycle checkpoint signaling	GO:0000075	1.25471e-21	20.9015	196	96	23	18123	BUB1B,BUB1,CHEK1,TIMELESS,PCNA,ORC1,ZWILCH,GTSE1,CDK1,ZWINT,MAD2L1,TTK,BRCA1,PLK1,RQCD1,CCNB1,CDK2,CLSPN,DNA2,CDC25C,RFWD3,WDR76,SPDL1
GO:BP	regulation of mitotic cell cycle	GO:0007346	2.58541e-20	19.5875	612	96	32	18123	BUB1B,NUSAP1,BUB1,CHEK1,PCNA,ORC1,PLK4,TPX2,ZWILCH,CDCA5,GTSE1,DLGAP5,CDK1,ZWINT,MAD2L1,TTK,BRCA1,EZH2,FBXO5,PLK1,RQCD1,CCNB1,CDK2,CDC7,KIF14,CLSPN,DTL,NEK2,CDC25C,CEP78,RFWD3,SPDL1
GO:BP	negative regulation of cell cycle	GO:0045786	1.28332e-19	18.8917	487	96	29	18123	BUB1B,BUB1,CHEK1,TIMELESS,PCNA,ORC1,ZWILCH,RAD51,GTSE1,CDK1,ZWINT,MAD2L1,TTK,BRCA1,EZH2,FBXO5,PLK1,RQCD1,CCNB1,CDK2,CDC7,CLSPN,CCNF,DNA2,NEK2,CDC25C,RFWD3,WDR76,SPDL1
GO:BP	DNA conformation change	GO:0071103	2.20584e-19	18.6564	359	96	26	18123	MCM6,NUSAP1,NCAPH,CENPO,NCAPG,HJURP,NCAPG2,CENPI,RFC5,OIP5,RAD51,CDCA5,CENPK,CDK1,ASF1B,PLK1,CENPA,CCNB1,CENPL,MCM2,INCENP,CENPH,ERCC6L,DNA2,MCM8,RFC2
GO:BP	mitotic cell cycle checkpoint signaling	GO:0007093	4.10895e-19	18.3863	158	96	20	18123	BUB1B,BUB1,CHEK1,PCNA,ORC1,ZWILCH,GTSE1,CDK1,ZWINT,MAD2L1,TTK,BRCA1,PLK1,RQCD1,CCNB1,CDK2,CLSPN,CDC25C,RFWD3,SPDL1
GO:BP	negative regulation of cell cycle phase transition	GO:1901988	5.01642e-19	18.2996	329	96	25	18123	BUB1B,BUB1,CHEK1,TIMELESS,PCNA,ORC1,ZWILCH,GTSE1,CDK1,ZWINT,MAD2L1,TTK,BRCA1,EZH2,FBXO5,PLK1,RQCD1,CCNB1,CDK2,CLSPN,DNA2,CDC25C,RFWD3,WDR76,SPDL1
GO:BP	DNA-dependent DNA replication	GO:0006261	9.49841e-18	17.0223	216	96	21	18123	MCM6,GINS1,TIMELESS,PCNA,ORC1,RFC5,RAD51,FEN1,WDHD1,PRIM1,FBXO5,ORC6,MCM2,CDK2,CDC7,POLA2,DNA2,MCM8,RFC2,RFWD3,MCM10
GO:BP	cellular response to DNA damage stimulus	GO:0006974	2.03965e-17	16.6904	894	96	34	18123	MCM6,CHEK1,TIMELESS,FANCI,PCNA,RFC5,PARPBP,RAD51,CDCA5,GTSE1,CDK1,UHRF1,FEN1,UBE2T,WDHD1,EXO1,XRCC2,BRCA1,FBXO5,RQCD1,CCNB1,ATAD5,MCM2,CDK2,CDC7,CLSPN,DTL,DNA2,MCM8,CDC25C,RFC2,RFWD3,WDR76,MCM10
GO:BP	cell cycle G2/M phase transition	GO:0044839	6.17807e-17	16.2091	273	96	22	18123	CHEK1,CCNB2,ORC1,PLK4,TPX2,GTSE1,CDK1,BRCA1,FBXO5,CCNA2,PLK1,CCNB1,ATAD5,CDK2,CDC7,KIF14,CLSPN,DTL,NEK2,MELK,CDC25C,CEP78
GO:BP	DNA metabolic process	GO:0006259	3.19433e-16	15.4956	976	96	34	18123	MCM6,CHEK1,GINS1,TIMELESS,FANCI,PCNA,ORC1,RFC5,PARPBP,RAD51,CDCA5,CDK1,UHRF1,FEN1,UBE2T,WDHD1,EXO1,XRCC2,PRIM1,BRCA1,EZH2,ORC6,MCM2,CDK2,CDC7,CLSPN,POLA2,DTL,DNA2,NEK2,MCM8,RFC2,RFWD3,MCM10
GO:BP	negative regulation of mitotic cell cycle phase transition	GO:1901991	4.65575e-16	15.332	260	96	21	18123	BUB1B,BUB1,CHEK1,PCNA,ORC1,GTSE1,CDK1,ZWINT,MAD2L1,TTK,BRCA1,EZH2,FBXO5,PLK1,RQCD1,CCNB1,CDK2,CLSPN,CDC25C,RFWD3,SPDL1
GO:BP	negative regulation of mitotic cell cycle	GO:0045930	1.68202e-15	14.7742	318	96	22	18123	BUB1B,BUB1,CHEK1,PCNA,ORC1,ZWILCH,GTSE1,CDK1,ZWINT,MAD2L1,TTK,BRCA1,EZH2,FBXO5,PLK1,RQCD1,CCNB1,CDK2,CLSPN,CDC25C,RFWD3,SPDL1
GO:BP	regulation of cell cycle G2/M phase transition	GO:1902749	4.32894e-15	14.3636	213	96	19	18123	CHEK1,ORC1,PLK4,TPX2,GTSE1,CDK1,BRCA1,FBXO5,PLK1,CCNB1,ATAD5,CDK2,CDC7,KIF14,CLSPN,DTL,NEK2,CDC25C,CEP78
GO:BP	G2/M transition of mitotic cell cycle	GO:0000086	1.11243e-14	13.9537	262	96	20	18123	CHEK1,CCNB2,ORC1,PLK4,TPX2,CDK1,BRCA1,FBXO5,CCNA2,PLK1,CCNB1,CDK2,CDC7,KIF14,CLSPN,DTL,NEK2,MELK,CDC25C,CEP78
GO:BP	DNA repair	GO:0006281	4.55965e-14	13.3411	586	96	26	18123	MCM6,CHEK1,TIMELESS,FANCI,PCNA,RFC5,PARPBP,RAD51,CDCA5,CDK1,UHRF1,FEN1,UBE2T,WDHD1,EXO1,XRCC2,BRCA1,MCM2,CDK2,CDC7,CLSPN,DTL,DNA2,MCM8,RFC2,RFWD3
GO:BP	DNA packaging	GO:0006323	6.5442e-14	13.1841	246	96	19	18123	NUSAP1,NCAPH,CENPO,NCAPG,HJURP,NCAPG2,CENPI,OIP5,CDCA5,CENPK,CDK1,ASF1B,PLK1,CENPA,CCNB1,CENPL,MCM2,INCENP,CENPH
GO:BP	cell cycle DNA replication	GO:0044786	7.37353e-14	13.1323	70	96	13	18123	MCM6,GINS1,PCNA,RFC5,RAD51,FEN1,PRIM1,FBXO5,MCM2,CDC7,POLA2,DNA2,RFC2
GO:BP	cellular component organization	GO:0016043	2.2871e-13	12.6407	6661	96	75	18123	RACGAP1,MCM6,BUB1B,SPC25,KIF4A,NUSAP1,KIF11,BUB1,NCAPH,CENPO,CHEK1,KIF23,NCAPG,PCNA,CCNB2,HJURP,NCAPG2,ORC1,PLK4,TPX2,ZWILCH,CENPI,RFC5,OIP5,RAD51,CDCA5,KIF2C,CENPK,DLGAP5,CDK1,ZWINT,UHRF1,FEN1,PRC1,MAD2L1,KIFC1,EXO1,XRCC2,PRIM1,TTK,ASF1B,BRCA1,EZH2,FBXO5,CCNA2,PLK1,KIF18A,ORC6,SKA1,CENPA,CCNB1,KIF18B,CENPL,MCM2,SGOL1,CDK2,INCENP,KIF14,CENPH,ERCC6L,POLA2,CCNF,DNA2,SASS6,NEK2,MCM8,KIF20A,CDC25C,CE…
GO:BP	positive regulation of cell cycle process	GO:0090068	6.46504e-13	12.1894	237	96	18	18123	RACGAP1,NUSAP1,KIF23,PLK4,CDCA5,DLGAP5,CDK1,FEN1,MAD2L1,EZH2,FBXO5,CCNB1,ATAD5,CDC7,KIF14,DTL,CDC25C,ECT2
GO:BP	regulation of G2/M transition of mitotic cell cycle	GO:0010389	9.73395e-13	12.0117	204	96	17	18123	CHEK1,ORC1,PLK4,TPX2,CDK1,BRCA1,FBXO5,PLK1,CCNB1,CDK2,CDC7,KIF14,CLSPN,DTL,NEK2,CDC25C,CEP78
GO:BP	regulation of mitotic nuclear division	GO:0007088	1.11021e-12	11.9546	110	96	14	18123	BUB1B,NUSAP1,BUB1,CHEK1,DLGAP5,ZWINT,MAD2L1,TTK,FBXO5,PLK1,CCNB1,NEK2,CDC25C,SPDL1
GO:BP	nuclear DNA replication	GO:0033260	1.66783e-12	11.7778	66	96	12	18123	MCM6,GINS1,PCNA,RFC5,RAD51,FEN1,PRIM1,MCM2,CDC7,POLA2,DNA2,RFC2
GO:BP	cellular component organization or biogenesis	GO:0071840	1.76586e-12	11.753	6880	96	75	18123	RACGAP1,MCM6,BUB1B,SPC25,KIF4A,NUSAP1,KIF11,BUB1,NCAPH,CENPO,CHEK1,KIF23,NCAPG,PCNA,CCNB2,HJURP,NCAPG2,ORC1,PLK4,TPX2,ZWILCH,CENPI,RFC5,OIP5,RAD51,CDCA5,KIF2C,CENPK,DLGAP5,CDK1,ZWINT,UHRF1,FEN1,PRC1,MAD2L1,KIFC1,EXO1,XRCC2,PRIM1,TTK,ASF1B,BRCA1,EZH2,FBXO5,CCNA2,PLK1,KIF18A,ORC6,SKA1,CENPA,CCNB1,KIF18B,CENPL,MCM2,SGOL1,CDK2,INCENP,KIF14,CENPH,ERCC6L,POLA2,CCNF,DNA2,SASS6,NEK2,MCM8,KIF20A,CDC25C,CE…
GO:BP	positive regulation of cell cycle	GO:0045787	7.12483e-12	11.1472	317	96	19	18123	RACGAP1,NUSAP1,CHEK1,KIF23,PLK4,CDCA5,DLGAP5,CDK1,FEN1,MAD2L1,EZH2,FBXO5,CCNB1,ATAD5,CDC7,KIF14,DTL,CDC25C,ECT2
GO:BP	regulation of nuclear division	GO:0051783	2.82668e-11	10.5487	138	96	14	18123	BUB1B,NUSAP1,BUB1,CHEK1,DLGAP5,ZWINT,MAD2L1,TTK,FBXO5,PLK1,CCNB1,NEK2,CDC25C,SPDL1
GO:BP	DNA integrity checkpoint signaling	GO:0031570	5.14892e-11	10.2883	144	96	14	18123	CHEK1,TIMELESS,PCNA,ORC1,GTSE1,CDK1,RQCD1,CCNB1,CDK2,CLSPN,DNA2,CDC25C,RFWD3,WDR76
GO:BP	spindle assembly	GO:0051225	6.26164e-11	10.2033	115	96	13	18123	RACGAP1,KIF4A,KIF11,KIF23,CCNB2,TPX2,PRC1,KIFC1,FBXO5,PLK1,INCENP,NEK2,ASPM
GO:BP	negative regulation of mitotic nuclear division	GO:0045839	1.06384e-10	9.97312	48	96	10	18123	BUB1B,BUB1,CHEK1,ZWINT,MAD2L1,TTK,FBXO5,PLK1,CCNB1,SPDL1
GO:BP	DNA replication initiation	GO:0006270	1.33085e-10	9.87587	49	96	10	18123	MCM6,ORC1,PRIM1,ORC6,MCM2,CDK2,CDC7,POLA2,MCM8,MCM10
GO:BP	negative regulation of nuclear division	GO:0051784	5.59437e-10	9.25225	56	96	10	18123	BUB1B,BUB1,CHEK1,ZWINT,MAD2L1,TTK,FBXO5,PLK1,CCNB1,SPDL1
GO:BP	meiotic cell cycle	GO:0051321	8.12329e-10	9.09027	259	96	16	18123	BUB1B,BUB1,CCNB2,RAD51,EXO1,XRCC2,TTK,FBXO5,PLK1,KIF18A,SGOL1,CDK2,INCENP,NEK2,CDC25C,ASPM
GO:BP	negative regulation of mitotic metaphase/anaphase transition	GO:0045841	9.54304e-10	9.02031	40	96	9	18123	BUB1B,BUB1,ZWINT,MAD2L1,TTK,FBXO5,PLK1,CCNB1,SPDL1
GO:BP	regulation of mitotic metaphase/anaphase transition	GO:0030071	9.74386e-10	9.01127	59	96	10	18123	BUB1B,BUB1,DLGAP5,ZWINT,MAD2L1,TTK,FBXO5,PLK1,CCNB1,SPDL1
GO:BP	metaphase/anaphase transition of mitotic cell cycle	GO:0007091	1.38648e-09	8.85809	61	96	10	18123	BUB1B,BUB1,DLGAP5,ZWINT,MAD2L1,TTK,FBXO5,PLK1,CCNB1,SPDL1
GO:BP	negative regulation of mitotic sister chromatid separation	GO:2000816	1.54274e-09	8.81171	42	96	9	18123	BUB1B,BUB1,ZWINT,MAD2L1,TTK,FBXO5,PLK1,CCNB1,SPDL1
GO:BP	negative regulation of mitotic sister chromatid segregation	GO:0033048	1.54274e-09	8.81171	42	96	9	18123	BUB1B,BUB1,ZWINT,MAD2L1,TTK,FBXO5,PLK1,CCNB1,SPDL1
GO:BP	negative regulation of metaphase/anaphase transition of cell cycle	GO:1902100	1.54274e-09	8.81171	42	96	9	18123	BUB1B,BUB1,ZWINT,MAD2L1,TTK,FBXO5,PLK1,CCNB1,SPDL1
GO:BP	negative regulation of sister chromatid segregation	GO:0033046	1.54274e-09	8.81171	42	96	9	18123	BUB1B,BUB1,ZWINT,MAD2L1,TTK,FBXO5,PLK1,CCNB1,SPDL1
GO:BP	regulation of chromosome segregation	GO:0051983	1.61128e-09	8.79283	86	96	11	18123	BUB1B,BUB1,KIF2C,DLGAP5,ZWINT,MAD2L1,TTK,FBXO5,PLK1,CCNB1,SPDL1
GO:BP	regulation of metaphase/anaphase transition of cell cycle	GO:1902099	1.64597e-09	8.78358	62	96	10	18123	BUB1B,BUB1,DLGAP5,ZWINT,MAD2L1,TTK,FBXO5,PLK1,CCNB1,SPDL1
GO:BP	regulation of mitotic sister chromatid separation	GO:0010965	1.94807e-09	8.71039	63	96	10	18123	BUB1B,BUB1,DLGAP5,ZWINT,MAD2L1,TTK,FBXO5,PLK1,CCNB1,SPDL1
GO:BP	metaphase/anaphase transition of cell cycle	GO:0044784	2.29886e-09	8.63849	64	96	10	18123	BUB1B,BUB1,DLGAP5,ZWINT,MAD2L1,TTK,FBXO5,PLK1,CCNB1,SPDL1
GO:BP	negative regulation of chromosome separation	GO:1905819	2.43166e-09	8.6141	44	96	9	18123	BUB1B,BUB1,ZWINT,MAD2L1,TTK,FBXO5,PLK1,CCNB1,SPDL1
GO:BP	negative regulation of chromosome segregation	GO:0051985	2.43166e-09	8.6141	44	96	9	18123	BUB1B,BUB1,ZWINT,MAD2L1,TTK,FBXO5,PLK1,CCNB1,SPDL1
GO:BP	mitotic sister chromatid separation	GO:0051306	2.70509e-09	8.56782	65	96	10	18123	BUB1B,BUB1,DLGAP5,ZWINT,MAD2L1,TTK,FBXO5,PLK1,CCNB1,SPDL1
GO:BP	regulation of mitotic sister chromatid segregation	GO:0033047	3.02644e-09	8.51907	45	96	9	18123	BUB1B,BUB1,ZWINT,MAD2L1,TTK,FBXO5,PLK1,CCNB1,SPDL1
GO:BP	cellular response to stress	GO:0033554	5.80286e-09	8.23636	2142	96	38	18123	MCM6,CHEK1,TIMELESS,FANCI,PCNA,RFC5,PARPBP,RAD51,CDCA5,GTSE1,CDK1,UHRF1,FEN1,UBE2T,WDHD1,EXO1,XRCC2,BRCA1,EZH2,FBXO5,CCNA2,RQCD1,CCNB1,ATAD5,MCM2,CDK2,CDC7,CLSPN,DTL,DNA2,MELK,MCM8,CDC25C,ECT2,RFC2,RFWD3,WDR76,MCM10
GO:BP	regulation of sister chromatid segregation	GO:0033045	5.86628e-09	8.23164	70	96	10	18123	BUB1B,BUB1,DLGAP5,ZWINT,MAD2L1,TTK,FBXO5,PLK1,CCNB1,SPDL1
GO:BP	regulation of chromosome separation	GO:1905818	5.86628e-09	8.23164	70	96	10	18123	BUB1B,BUB1,DLGAP5,ZWINT,MAD2L1,TTK,FBXO5,PLK1,CCNB1,SPDL1
GO:BP	centrosome cycle	GO:0007098	7.41505e-09	8.12989	130	96	12	18123	KIF11,CHEK1,PLK4,CDK1,XRCC2,BRCA1,PLK1,SGOL1,CDK2,CCNF,SASS6,NEK2
GO:BP	protein-DNA complex assembly	GO:0065004	7.66519e-09	8.11548	300	96	16	18123	MCM6,CENPO,HJURP,ORC1,CENPI,OIP5,RAD51,CENPK,DLGAP5,ASF1B,ORC6,CENPA,CENPL,MCM2,CENPH,MCM8
GO:BP	DNA replication-independent nucleosome assembly	GO:0006336	1.46193e-08	7.83507	53	96	9	18123	CENPO,HJURP,CENPI,OIP5,CENPK,ASF1B,CENPA,CENPL,CENPH
GO:BP	DNA replication-independent nucleosome organization	GO:0034724	1.74673e-08	7.75777	54	96	9	18123	CENPO,HJURP,CENPI,OIP5,CENPK,ASF1B,CENPA,CENPL,CENPH
GO:BP	double-strand break repair via homologous recombination	GO:0000724	1.79617e-08	7.74565	140	96	12	18123	MCM6,CHEK1,TIMELESS,PARPBP,RAD51,FEN1,XRCC2,BRCA1,MCM2,CDC7,MCM8,RFWD3
GO:BP	microtubule organizing center organization	GO:0031023	1.95482e-08	7.70889	141	96	12	18123	KIF11,CHEK1,PLK4,CDK1,XRCC2,BRCA1,PLK1,SGOL1,CDK2,CCNF,SASS6,NEK2
GO:BP	recombinational repair	GO:0000725	2.12609e-08	7.67242	142	96	12	18123	MCM6,CHEK1,TIMELESS,PARPBP,RAD51,FEN1,XRCC2,BRCA1,MCM2,CDC7,MCM8,RFWD3
GO:BP	centromere complex assembly	GO:0034508	2.46693e-08	7.60784	56	96	9	18123	CENPO,HJURP,CENPI,OIP5,CENPK,DLGAP5,CENPA,CENPL,CENPH
GO:BP	spindle assembly checkpoint signaling	GO:0071173	3.52917e-08	7.45233	38	96	8	18123	BUB1B,BUB1,ZWINT,MAD2L1,TTK,PLK1,CCNB1,SPDL1
GO:BP	mitotic spindle assembly checkpoint signaling	GO:0007094	3.52917e-08	7.45233	38	96	8	18123	BUB1B,BUB1,ZWINT,MAD2L1,TTK,PLK1,CCNB1,SPDL1
GO:BP	mitotic spindle checkpoint signaling	GO:0071174	3.52917e-08	7.45233	38	96	8	18123	BUB1B,BUB1,ZWINT,MAD2L1,TTK,PLK1,CCNB1,SPDL1
GO:BP	spindle checkpoint signaling	GO:0031577	4.42075e-08	7.3545	39	96	8	18123	BUB1B,BUB1,ZWINT,MAD2L1,TTK,PLK1,CCNB1,SPDL1
GO:BP	protein-DNA complex subunit organization	GO:0071824	6.53853e-08	7.18452	346	96	16	18123	MCM6,CENPO,HJURP,ORC1,CENPI,OIP5,RAD51,CENPK,DLGAP5,ASF1B,ORC6,CENPA,CENPL,MCM2,CENPH,MCM8
GO:BP	mitotic chromosome condensation	GO:0007076	6.8064e-08	7.16708	41	96	8	18123	NUSAP1,NCAPH,NCAPG,NCAPG2,CDCA5,CDK1,PLK1,CCNB1
GO:BP	regulation of chromosome organization	GO:0033044	9.0508e-08	7.04331	299	96	15	18123	BUB1B,BUB1,CDCA5,DLGAP5,ZWINT,FEN1,MAD2L1,TTK,BRCA1,FBXO5,PLK1,CCNB1,MCM2,NEK2,SPDL1
GO:BP	negative regulation of chromosome organization	GO:2001251	9.69397e-08	7.0135	92	96	10	18123	BUB1B,BUB1,ZWINT,MAD2L1,TTK,FBXO5,PLK1,CCNB1,MCM2,SPDL1
GO:BP	CENP-A containing nucleosome assembly	GO:0034080	1.02407e-07	6.98967	43	96	8	18123	CENPO,HJURP,CENPI,OIP5,CENPK,CENPA,CENPL,CENPH
GO:BP	CENP-A containing chromatin organization	GO:0061641	1.02407e-07	6.98967	43	96	8	18123	CENPO,HJURP,CENPI,OIP5,CENPK,CENPA,CENPL,CENPH
GO:BP	mitotic spindle assembly	GO:0090307	1.15416e-07	6.93773	66	96	9	18123	RACGAP1,KIF4A,KIF11,KIF23,TPX2,PRC1,KIFC1,PLK1,NEK2
GO:BP	protein localization to chromosome	GO:0034502	1.20502e-07	6.91901	94	96	10	18123	BUB1B,ZWILCH,CDCA5,CDK1,TTK,EZH2,PLK1,CENPA,MCM8,SPDL1
GO:BP	chromosome condensation	GO:0030261	1.32749e-07	6.87697	67	96	9	18123	NUSAP1,NCAPH,NCAPG,NCAPG2,CDCA5,CDK1,PLK1,CCNB1,INCENP
GO:BP	chromosome separation	GO:0051304	1.34097e-07	6.87258	95	96	10	18123	BUB1B,BUB1,DLGAP5,ZWINT,MAD2L1,TTK,FBXO5,PLK1,CCNB1,SPDL1
GO:BP	chromatin remodeling at centromere	GO:0031055	1.81898e-07	6.74017	46	96	8	18123	CENPO,HJURP,CENPI,OIP5,CENPK,CENPA,CENPL,CENPH
GO:BP	cytokinesis	GO:0000910	2.32233e-07	6.63408	174	96	12	18123	RACGAP1,KIF4A,NUSAP1,KIF23,PLK4,PRC1,PLK1,CENPA,INCENP,KIF14,KIF20A,ECT2
GO:BP	regulation of cell division	GO:0051302	2.48258e-07	6.6051	175	96	12	18123	RACGAP1,KIF23,PLK4,PRC1,PLK1,ORC6,KIF18B,INCENP,KIF14,KIF20A,ASPM,ECT2
GO:BP	DNA damage checkpoint signaling	GO:0000077	2.58388e-07	6.58773	136	96	11	18123	CHEK1,PCNA,GTSE1,CDK1,RQCD1,CCNB1,CDK2,CLSPN,CDC25C,RFWD3,WDR76
GO:BP	positive regulation of cell cycle G2/M phase transition	GO:1902751	3.08387e-07	6.5109	30	96	7	18123	CDK1,FBXO5,CCNB1,ATAD5,CDC7,DTL,CDC25C
GO:BP	mitotic cytokinesis	GO:0000281	3.3289e-07	6.4777	74	96	9	18123	RACGAP1,KIF4A,NUSAP1,KIF23,PLK1,CENPA,INCENP,KIF20A,ECT2
GO:BP	double-strand break repair	GO:0006302	4.39655e-07	6.35689	280	96	14	18123	MCM6,CHEK1,TIMELESS,PARPBP,RAD51,CDCA5,FEN1,XRCC2,BRCA1,MCM2,CDC7,DNA2,MCM8,RFWD3
GO:BP	mitotic DNA integrity checkpoint signaling	GO:0044774	4.42673e-07	6.35392	107	96	10	18123	PCNA,ORC1,GTSE1,CDK1,RQCD1,CCNB1,CDK2,CLSPN,CDC25C,RFWD3
GO:BP	regulation of DNA replication	GO:0006275	4.85735e-07	6.3136	108	96	10	18123	TIMELESS,PCNA,RFC5,CDK1,FBXO5,CCNA2,ATAD5,CDC7,DNA2,RFC2
GO:BP	organelle assembly	GO:0070925	5.85971e-07	6.23212	921	96	23	18123	RACGAP1,KIF4A,KIF11,KIF23,CCNB2,PLK4,TPX2,CENPK,DLGAP5,CDK1,PRC1,KIFC1,BRCA1,FBXO5,PLK1,CENPA,CDK2,INCENP,CENPH,SASS6,NEK2,CEP78,ASPM
GO:BP	cell cycle G1/S phase transition	GO:0044843	6.07879e-07	6.21618	287	96	14	18123	PCNA,ORC1,GTSE1,CDK1,EZH2,FBXO5,CCNA2,RQCD1,CCNB1,CDK2,CDC7,KIF14,CDC25C,RFWD3
GO:BP	signal transduction by p53 class mediator	GO:0072331	6.96543e-07	6.15705	290	96	14	18123	CHEK1,PCNA,TPX2,RFC5,GTSE1,CDK1,EXO1,BRCA1,RQCD1,CCNB1,CDK2,DNA2,CDC25C,RFC2
GO:BP	positive regulation of cell cycle phase transition	GO:1901989	8.3182e-07	6.07997	114	96	10	18123	CDCA5,DLGAP5,CDK1,EZH2,FBXO5,CCNB1,ATAD5,CDC7,DTL,CDC25C
GO:BP	establishment of chromosome localization	GO:0051303	8.52575e-07	6.06927	82	96	9	18123	CDCA5,KIF2C,DLGAP5,KIFC1,KIF18A,CCNB1,INCENP,KIF14,SPDL1
GO:BP	telomere maintenance via semi-conservative replication	GO:0032201	9.96946e-07	6.00133	35	96	7	18123	PCNA,RFC5,FEN1,PRIM1,POLA2,DNA2,RFC2
GO:BP	chromosome localization	GO:0050000	1.06178e-06	5.97397	84	96	9	18123	CDCA5,KIF2C,DLGAP5,KIFC1,KIF18A,CCNB1,INCENP,KIF14,SPDL1
GO:BP	meiotic cell cycle process	GO:1903046	1.16247e-06	5.93462	200	96	12	18123	BUB1B,BUB1,CCNB2,RAD51,TTK,FBXO5,PLK1,KIF18A,SGOL1,INCENP,CDC25C,ASPM
GO:BP	regulation of cytokinesis	GO:0032465	1.98468e-06	5.70231	90	96	9	18123	RACGAP1,KIF23,PLK4,PRC1,PLK1,INCENP,KIF14,KIF20A,ECT2
GO:BP	G1/S transition of mitotic cell cycle	GO:0000082	2.02209e-06	5.6942	260	96	13	18123	PCNA,ORC1,GTSE1,CDK1,EZH2,FBXO5,RQCD1,CCNB1,CDK2,CDC7,KIF14,CDC25C,RFWD3
GO:BP	telomere maintenance	GO:0000723	2.65533e-06	5.57588	169	96	11	18123	PCNA,RFC5,RAD51,FEN1,EXO1,PRIM1,CDK2,POLA2,DNA2,NEK2,RFC2
GO:BP	mitotic G1 DNA damage checkpoint signaling	GO:0031571	3.24091e-06	5.48933	65	96	8	18123	PCNA,GTSE1,CDK1,RQCD1,CCNB1,CDK2,CDC25C,RFWD3
GO:BP	metaphase plate congression	GO:0051310	3.24091e-06	5.48933	65	96	8	18123	CDCA5,KIF2C,KIFC1,KIF18A,CCNB1,INCENP,KIF14,SPDL1
GO:BP	mitotic G1/S transition checkpoint signaling	GO:0044819	3.67202e-06	5.4351	66	96	8	18123	PCNA,GTSE1,CDK1,RQCD1,CCNB1,CDK2,CDC25C,RFWD3
GO:BP	reproductive process	GO:0022414	4.32102e-06	5.36441	1512	96	28	18123	RACGAP1,BUB1B,BUB1,PCNA,CCNB2,PLK4,CENPI,RAD51,CDK1,KIFC1,EXO1,XRCC2,TTK,ASF1B,FBXO5,PLK1,KIF18A,RQCD1,CCNB1,SGOL1,CDK2,INCENP,CCNF,NEK2,MCM8,CDC25C,ASPM,RRM1
GO:BP	reproduction	GO:0000003	4.51658e-06	5.34519	1515	96	28	18123	RACGAP1,BUB1B,BUB1,PCNA,CCNB2,PLK4,CENPI,RAD51,CDK1,KIFC1,EXO1,XRCC2,TTK,ASF1B,FBXO5,PLK1,KIF18A,RQCD1,CCNB1,SGOL1,CDK2,INCENP,CCNF,NEK2,MCM8,CDC25C,ASPM,RRM1
GO:BP	spindle midzone assembly	GO:0051255	5.15551e-06	5.28773	12	96	5	18123	RACGAP1,KIF4A,KIF23,PRC1,INCENP
GO:BP	protein localization to chromosome, centromeric region	GO:0071459	5.49853e-06	5.25975	25	96	6	18123	BUB1B,ZWILCH,CDK1,TTK,CENPA,SPDL1
GO:BP	cytoskeleton-dependent cytokinesis	GO:0061640	6.11026e-06	5.21394	102	96	9	18123	RACGAP1,KIF4A,NUSAP1,KIF23,PLK1,CENPA,INCENP,KIF20A,ECT2
GO:BP	telomere organization	GO:0032200	6.15597e-06	5.2107	183	96	11	18123	PCNA,RFC5,RAD51,FEN1,EXO1,PRIM1,CDK2,POLA2,DNA2,NEK2,RFC2
GO:BP	cellular component assembly	GO:0022607	6.28783e-06	5.2015	3104	96	41	18123	RACGAP1,MCM6,KIF4A,KIF11,CENPO,KIF23,CCNB2,HJURP,ORC1,PLK4,TPX2,CENPI,OIP5,RAD51,CENPK,DLGAP5,CDK1,PRC1,KIFC1,EXO1,ASF1B,BRCA1,FBXO5,PLK1,ORC6,CENPA,CCNB1,CENPL,MCM2,CDK2,INCENP,KIF14,CENPH,DNA2,SASS6,NEK2,MCM8,CEP78,ASPM,ECT2,RRM1
GO:BP	meiotic nuclear division	GO:0140013	6.51913e-06	5.18581	184	96	11	18123	BUB1B,BUB1,CCNB2,RAD51,TTK,FBXO5,PLK1,KIF18A,SGOL1,INCENP,ASPM
GO:BP	histone exchange	GO:0043486	6.65633e-06	5.17677	71	96	8	18123	CENPO,HJURP,CENPI,OIP5,CENPK,CENPA,CENPL,CENPH
GO:BP	mitotic DNA damage checkpoint signaling	GO:0044773	6.66633e-06	5.17611	103	96	9	18123	PCNA,GTSE1,CDK1,RQCD1,CCNB1,CDK2,CLSPN,CDC25C,RFWD3
GO:BP	nucleosome assembly	GO:0006334	7.19087e-06	5.14322	142	96	10	18123	CENPO,HJURP,CENPI,OIP5,CENPK,ASF1B,CENPA,CENPL,MCM2,CENPH
GO:BP	positive regulation of G2/M transition of mitotic cell cycle	GO:0010971	9.11237e-06	5.04037	27	96	6	18123	CDK1,FBXO5,CCNB1,CDC7,DTL,CDC25C
GO:BP	signal transduction in response to DNA damage	GO:0042770	1.01882e-05	4.9919	192	96	11	18123	CHEK1,PCNA,GTSE1,CDK1,RQCD1,CCNB1,CDK2,CLSPN,CDC25C,RFWD3,WDR76
GO:BP	negative regulation of organelle organization	GO:0010639	1.17541e-05	4.92981	361	96	14	18123	BUB1B,BUB1,CHEK1,TPX2,ZWINT,MAD2L1,TTK,BRCA1,FBXO5,PLK1,CCNB1,MCM2,CCNF,SPDL1
GO:BP	mitotic metaphase plate congression	GO:0007080	1.38824e-05	4.85754	50	96	7	18123	CDCA5,KIF2C,KIFC1,KIF18A,CCNB1,KIF14,SPDL1
GO:BP	organelle localization	GO:0051640	1.61372e-05	4.79217	657	96	18	18123	NUSAP1,PLK4,CDCA5,KIF2C,DLGAP5,CDK1,MAD2L1,KIFC1,PLK1,KIF18A,CENPA,CCNB1,INCENP,KIF14,NEK2,CEP78,ASPM,SPDL1
GO:BP	regulation of organelle organization	GO:0033043	2.897e-05	4.53805	1228	96	24	18123	BUB1B,NUSAP1,BUB1,CHEK1,PLK4,TPX2,CDCA5,DLGAP5,ZWINT,FEN1,MAD2L1,TTK,BRCA1,FBXO5,PLK1,KIF18A,SKA1,CCNB1,MCM2,CCNF,NEK2,CDC25C,ECT2,SPDL1
GO:BP	DNA recombination	GO:0006310	3.29905e-05	4.48161	328	96	13	18123	MCM6,CHEK1,TIMELESS,PARPBP,RAD51,FEN1,EXO1,XRCC2,BRCA1,MCM2,CDC7,MCM8,RFWD3
GO:BP	negative regulation of G1/S transition of mitotic cell cycle	GO:2000134	4.24239e-05	4.37239	127	96	9	18123	PCNA,GTSE1,CDK1,EZH2,RQCD1,CCNB1,CDK2,CDC25C,RFWD3
GO:BP	positive regulation of mitotic cell cycle phase transition	GO:1901992	4.4671e-05	4.34997	90	96	8	18123	CDCA5,DLGAP5,CDK1,FBXO5,CCNB1,CDC7,DTL,CDC25C
GO:BP	attachment of spindle microtubules to kinetochore	GO:0008608	5.77041e-05	4.23879	36	96	6	18123	RACGAP1,KIF2C,CCNB1,SGOL1,NEK2,ECT2
GO:BP	negative regulation of cell cycle G1/S phase transition	GO:1902807	6.34683e-05	4.19744	133	96	9	18123	PCNA,GTSE1,CDK1,EZH2,RQCD1,CCNB1,CDK2,CDC25C,RFWD3
GO:BP	regulation of G1/S transition of mitotic cell cycle	GO:2000045	7.00441e-05	4.15463	180	96	10	18123	PCNA,GTSE1,CDK1,EZH2,RQCD1,CCNB1,CDK2,KIF14,CDC25C,RFWD3
GO:BP	cellular component biogenesis	GO:0044085	7.70699e-05	4.11312	3377	96	41	18123	RACGAP1,MCM6,KIF4A,KIF11,CENPO,KIF23,CCNB2,HJURP,ORC1,PLK4,TPX2,CENPI,OIP5,RAD51,CENPK,DLGAP5,CDK1,PRC1,KIFC1,EXO1,ASF1B,BRCA1,FBXO5,PLK1,ORC6,CENPA,CCNB1,CENPL,MCM2,CDK2,INCENP,KIF14,CENPH,DNA2,SASS6,NEK2,MCM8,CEP78,ASPM,ECT2,RRM1
GO:BP	histone phosphorylation	GO:0016572	8.10921e-05	4.09102	38	96	6	18123	CHEK1,CDK1,CCNA2,CCNB1,CDK2,INCENP
GO:BP	mitotic spindle midzone assembly	GO:0051256	9.09221e-05	4.04133	8	96	4	18123	RACGAP1,KIF4A,KIF23,PRC1
GO:BP	nucleosome organization	GO:0034728	0.00010567	3.97605	188	96	10	18123	CENPO,HJURP,CENPI,OIP5,CENPK,ASF1B,CENPA,CENPL,MCM2,CENPH
GO:BP	ATP-dependent chromatin remodeling	GO:0043044	0.000119985	3.92087	102	96	8	18123	CENPO,HJURP,CENPI,OIP5,CENPK,CENPA,CENPL,CENPH
GO:BP	chromatin organization	GO:0006325	0.000124331	3.90542	839	96	19	18123	CENPO,CHEK1,HJURP,CENPI,OIP5,CENPK,CDK1,UHRF1,ASF1B,BRCA1,EZH2,CCNA2,CENPA,CCNB1,CENPL,MCM2,CDK2,INCENP,CENPH
GO:BP	chromatin assembly	GO:0031497	0.000142043	3.84758	194	96	10	18123	CENPO,HJURP,CENPI,OIP5,CENPK,ASF1B,CENPA,CENPL,MCM2,CENPH
GO:BP	mitotic spindle elongation	GO:0000022	0.000162995	3.78782	9	96	4	18123	RACGAP1,KIF4A,KIF23,PRC1
GO:BP	spindle elongation	GO:0051231	0.000162995	3.78782	9	96	4	18123	RACGAP1,KIF4A,KIF23,PRC1
GO:BP	DNA duplex unwinding	GO:0032508	0.000201665	3.69537	109	96	8	18123	MCM6,RFC5,RAD51,MCM2,ERCC6L,DNA2,MCM8,RFC2
GO:BP	regulation of cell cycle G1/S phase transition	GO:1902806	0.000238129	3.62319	205	96	10	18123	PCNA,GTSE1,CDK1,EZH2,RQCD1,CCNB1,CDK2,KIF14,CDC25C,RFWD3
GO:BP	DNA geometric change	GO:0032392	0.000285885	3.54381	114	96	8	18123	MCM6,RFC5,RAD51,MCM2,ERCC6L,DNA2,MCM8,RFC2
GO:BP	regulation of DNA-dependent DNA replication	GO:0090329	0.000303539	3.51778	47	96	6	18123	TIMELESS,PCNA,RFC5,FBXO5,CDC7,RFC2
GO:BP	positive regulation of mitotic cell cycle	GO:0045931	0.000373488	3.42772	118	96	8	18123	CDCA5,DLGAP5,CDK1,FBXO5,CCNB1,CDC7,DTL,CDC25C
GO:BP	chromatin assembly or disassembly	GO:0006333	0.000440186	3.35636	219	96	10	18123	CENPO,HJURP,CENPI,OIP5,CENPK,ASF1B,CENPA,CENPL,MCM2,CENPH
GO:BP	mitotic nuclear membrane disassembly	GO:0007077	0.000632573	3.19889	12	96	4	18123	CCNB2,CDK1,PLK1,CCNB1
GO:BP	retrograde vesicle-mediated transport, Golgi to endoplasmic reticulum	GO:0006890	0.000692622	3.1595	87	96	7	18123	RACGAP1,KIF4A,KIF11,KIF23,KIF2C,KIF18A,KIF15
GO:BP	anaphase-promoting complex-dependent catabolic process	GO:0031145	0.000692622	3.1595	87	96	7	18123	BUB1B,CDK1,MAD2L1,FBXO5,PLK1,CCNB1,CDK2
GO:BP	sister chromatid cohesion	GO:0007062	0.000883332	3.05388	56	96	6	18123	BUB1B,BUB1,CDCA5,FEN1,PLK1,SGOL1
GO:BP	spindle localization	GO:0051653	0.000983058	3.00742	57	96	6	18123	NUSAP1,MAD2L1,PLK1,CENPA,ASPM,SPDL1
GO:BP	DNA damage response, signal transduction by p53 class mediator resulting in cell cycle arrest	GO:0006977	0.000983058	3.00742	57	96	6	18123	PCNA,GTSE1,CDK1,RQCD1,CCNB1,CDC25C
GO:BP	establishment of organelle localization	GO:0051656	0.00106548	2.97245	443	96	13	18123	NUSAP1,CDCA5,KIF2C,DLGAP5,MAD2L1,KIFC1,PLK1,KIF18A,CENPA,CCNB1,INCENP,KIF14,SPDL1
GO:BP	regulation of attachment of spindle microtubules to kinetochore	GO:0051988	0.00126884	2.89659	14	96	4	18123	RACGAP1,CCNB1,NEK2,ECT2
GO:BP	antigen processing and presentation of exogenous peptide antigen via MHC class II	GO:0019886	0.0014586	2.83606	97	96	7	18123	RACGAP1,KIF4A,KIF11,KIF23,KIF2C,KIF18A,KIF15
GO:BP	microtubule-based movement	GO:0007018	0.00159418	2.79746	385	96	12	18123	RACGAP1,KIF4A,KIF11,KIF23,KIF2C,DLGAP5,KIFC1,KIF18A,KIF15,KIF18B,KIF14,KIF20A
GO:BP	mitotic G2/M transition checkpoint	GO:0044818	0.00165184	2.78203	34	96	5	18123	CHEK1,ORC1,CDK1,BRCA1,CLSPN
GO:BP	mitotic DNA replication	GO:1902969	0.00172322	2.76366	15	96	4	18123	MCM6,GINS1,RAD51,MCM2
GO:BP	antigen processing and presentation of peptide antigen via MHC class II	GO:0002495	0.0019196	2.71679	101	96	7	18123	RACGAP1,KIF4A,KIF11,KIF23,KIF2C,KIF18A,KIF15
GO:BP	establishment of mitotic spindle localization	GO:0040001	0.00221933	2.65378	36	96	5	18123	NUSAP1,MAD2L1,PLK1,CENPA,SPDL1
GO:BP	regulation of signal transduction by p53 class mediator	GO:1901796	0.00222743	2.6522	202	96	9	18123	CHEK1,TPX2,RFC5,CDK1,EXO1,BRCA1,CDK2,DNA2,RFC2
GO:BP	nuclear membrane disassembly	GO:0051081	0.00228831	2.64049	16	96	4	18123	CCNB2,CDK1,PLK1,CCNB1
GO:BP	membrane disassembly	GO:0030397	0.00228831	2.64049	16	96	4	18123	CCNB2,CDK1,PLK1,CCNB1
GO:BP	antigen processing and presentation of peptide or polysaccharide antigen via MHC class II	GO:0002504	0.00234053	2.63069	104	96	7	18123	RACGAP1,KIF4A,KIF11,KIF23,KIF2C,KIF18A,KIF15
GO:BP	DNA replication checkpoint signaling	GO:0000076	0.00298027	2.52575	17	96	4	18123	TIMELESS,ORC1,CLSPN,DNA2
GO:BP	positive regulation of DNA replication	GO:0045740	0.00334716	2.47532	39	96	5	18123	PCNA,CDK1,ATAD5,CDC7,DNA2
GO:BP	kinetochore assembly	GO:0051382	0.00381623	2.41837	18	96	4	18123	CENPK,DLGAP5,CENPA,CENPH
GO:BP	negative regulation of G0 to G1 transition	GO:0070317	0.00432032	2.36448	41	96	5	18123	CHEK1,RAD51,BRCA1,EZH2,CDC7
GO:BP	protein localization to condensed chromosome	GO:1903083	0.00481429	2.31747	19	96	4	18123	ZWILCH,CDK1,TTK,SPDL1
GO:BP	protein localization to kinetochore	GO:0034501	0.00481429	2.31747	19	96	4	18123	ZWILCH,CDK1,TTK,SPDL1
GO:BP	regulation of response to DNA damage stimulus	GO:2001020	0.00542152	2.26588	225	96	9	18123	CHEK1,TIMELESS,PCNA,PARPBP,RAD51,BRCA1,FBXO5,RFWD3,WDR76
GO:BP	regulation of G0 to G1 transition	GO:0070316	0.00773894	2.11132	46	96	5	18123	CHEK1,RAD51,BRCA1,EZH2,CDC7
GO:BP	protein phosphorylation	GO:0006468	0.00834379	2.07864	1673	96	24	18123	BUB1B,BUB1,CHEK1,CCNB2,PLK4,TPX2,RAD51,CDK1,TTK,EZH2,CCNA2,PLK1,RQCD1,CCNB1,CDK2,INCENP,CDC7,KIF14,CLSPN,CCNF,NEK2,MELK,CDC25C,ECT2
GO:BP	G0 to G1 transition	GO:0045023	0.00958674	2.01833	48	96	5	18123	CHEK1,RAD51,BRCA1,EZH2,CDC7
GO:BP	DNA-dependent DNA replication maintenance of fidelity	GO:0045005	0.00958674	2.01833	48	96	5	18123	TIMELESS,PCNA,RAD51,DNA2,RFWD3
GO:BP	kinetochore organization	GO:0051383	0.0108213	1.96572	23	96	4	18123	CENPK,DLGAP5,CENPA,CENPH
GO:BP	intracellular signal transduction	GO:0035556	0.0122906	1.91043	2886	96	33	18123	RACGAP1,BUB1B,BUB1,CHEK1,TIMELESS,PCNA,ORC1,TPX2,ZWILCH,RFC5,GTSE1,CDK1,ZWINT,MAD2L1,EXO1,TTK,BRCA1,EZH2,CCNA2,PLK1,RQCD1,CCNB1,CDK2,KIF14,CLSPN,DNA2,MELK,CDC25C,ECT2,RFC2,RFWD3,WDR76,SPDL1
GO:BP	regulation of transferase activity	GO:0051338	0.0128954	1.88957	1036	96	18	18123	PCNA,CCNB2,TPX2,RFC5,MAD2L1,EZH2,FBXO5,CCNA2,PLK1,CCNB1,INCENP,KIF14,CLSPN,CCNF,NEK2,CDC25C,ECT2,RFC2
GO:BP	spindle assembly involved in meiosis	GO:0090306	0.0141297	1.84987	8	96	3	18123	CCNB2,FBXO5,ASPM
GO:BP	postreplication repair	GO:0006301	0.0143096	1.84437	52	96	5	18123	PCNA,RFC5,BRCA1,DTL,RFC2
GO:BP	establishment of spindle localization	GO:0051293	0.0143096	1.84437	52	96	5	18123	NUSAP1,MAD2L1,PLK1,CENPA,SPDL1
GO:BP	negative regulation of cellular component organization	GO:0051129	0.0187401	1.72723	760	96	15	18123	BUB1B,BUB1,CHEK1,TPX2,ZWINT,MAD2L1,TTK,BRCA1,FBXO5,PLK1,CCNB1,MCM2,KIF14,CCNF,SPDL1
GO:BP	protein-containing complex subunit organization	GO:0043933	0.0210754	1.67622	2017	96	26	18123	MCM6,CENPO,HJURP,ORC1,TPX2,CENPI,OIP5,RAD51,KIF2C,CENPK,DLGAP5,CDK1,ASF1B,FBXO5,KIF18A,ORC6,CENPA,CCNB1,KIF18B,CENPL,MCM2,KIF14,CENPH,MCM8,ECT2,RRM1
GO:BP	positive regulation of DNA-directed DNA polymerase activity	GO:1900264	0.0211131	1.67545	9	96	3	18123	PCNA,RFC5,RFC2
GO:BP	meiosis II	GO:0007135	0.0211131	1.67545	9	96	3	18123	BUB1B,BUB1,SGOL1
GO:BP	regulation of DNA-directed DNA polymerase activity	GO:1900262	0.0211131	1.67545	9	96	3	18123	PCNA,RFC5,RFC2
GO:BP	meiotic sister chromatid segregation	GO:0045144	0.0211131	1.67545	9	96	3	18123	BUB1B,BUB1,SGOL1
GO:BP	regulation of mitotic centrosome separation	GO:0046602	0.0211131	1.67545	9	96	3	18123	KIF11,CHEK1,NEK2
GO:BP	meiotic sister chromatid cohesion	GO:0051177	0.0211131	1.67545	9	96	3	18123	BUB1B,BUB1,SGOL1
GO:BP	meiosis II cell cycle process	GO:0061983	0.0211131	1.67545	9	96	3	18123	BUB1B,BUB1,SGOL1
GO:BP	female gamete generation	GO:0007292	0.0213246	1.67112	145	96	7	18123	CCNB2,TTK,FBXO5,PLK1,CCNB1,MCM8,ASPM
GO:BP	interstrand cross-link repair	GO:0036297	0.0225771	1.64633	57	96	5	18123	FANCI,RAD51,UBE2T,MCM8,RFWD3
GO:BP	regulation of cyclin-dependent protein serine/threonine kinase activity	GO:0000079	0.023952	1.62066	98	96	6	18123	CCNB2,CCNA2,PLK1,CCNB1,CCNF,CDC25C
GO:BP	female meiotic nuclear division	GO:0007143	0.0245189	1.6105	28	96	4	18123	CCNB2,TTK,FBXO5,PLK1
GO:BP	meiotic cell cycle phase transition	GO:0044771	0.0300456	1.52222	10	96	3	18123	CCNB2,TTK,CDC25C
GO:BP	regulation of cyclin-dependent protein kinase activity	GO:1904029	0.0301239	1.52109	102	96	6	18123	CCNB2,CCNA2,PLK1,CCNB1,CCNF,CDC25C
GO:BP	establishment of mitotic spindle orientation	GO:0000132	0.0325524	1.48742	30	96	4	18123	MAD2L1,PLK1,CENPA,SPDL1
GO:BP	protein localization to chromatin	GO:0071168	0.0372236	1.42918	31	96	4	18123	CDCA5,EZH2,PLK1,MCM8
GO:BP	centromeric sister chromatid cohesion	GO:0070601	0.0411539	1.38559	11	96	3	18123	BUB1B,BUB1,SGOL1
GO:BP	chromatin remodeling	GO:0006338	0.0419535	1.37723	222	96	8	18123	CENPO,HJURP,CENPI,OIP5,CENPK,CENPA,CENPL,CENPH
GO:BP	protein-containing complex assembly	GO:0065003	0.0450838	1.34598	1724	96	23	18123	MCM6,CENPO,HJURP,ORC1,TPX2,CENPI,OIP5,RAD51,CENPK,DLGAP5,CDK1,ASF1B,FBXO5,ORC6,CENPA,CCNB1,CENPL,MCM2,KIF14,CENPH,MCM8,ECT2,RRM1
GO:BP	DNA damage response, signal transduction by p53 class mediator	GO:0030330	0.0463148	1.33428	110	96	6	18123	PCNA,GTSE1,CDK1,RQCD1,CCNB1,CDC25C
GO:BP	pre-replicative complex assembly	GO:0036388	0.0464108	1.33338	66	96	5	18123	MCM6,ORC1,ORC6,MCM2,MCM8
GO:BP	regulation of cell cycle checkpoint	GO:1901976	0.0480179	1.3186	33	96	4	18123	MAD2L1,CCNB1,RFWD3,WDR76
GO:CC	chromosome	GO:0005694	1.06651e-36	35.972	1795	98	62	18964	MCM6,BUB1B,SPC25,KIF4A,NUSAP1,BUB1,NCAPH,CENPO,CHEK1,GINS1,TIMELESS,NCAPG,PCNA,HJURP,NCAPG2,ORC1,PLK4,ZWILCH,CENPI,RFC5,TMPO,PARPBP,OIP5,RAD51,CDCA5,KIF2C,CENPK,CDK1,ZWINT,UHRF1,FEN1,WDHD1,PRC1,MAD2L1,XRCC2,PRIM1,TTK,ASF1B,BRCA1,EZH2,PLK1,KIF18A,ORC6,SKA1,CENPA,CENPL,ATAD5,MCM2,SGOL1,INCENP,CENPH,ERCC6L,POLA2,DTL,DNA2,NEK2,MCM8,RFC2,RFWD3,WDR76,SPDL1,MCM10
GO:CC	intracellular non-membrane-bounded organelle	GO:0043232	1.57058e-35	34.8039	5094	98	87	18964	RACGAP1,MCM6,BUB1B,SPC25,KIF4A,NUSAP1,KIF11,BUB1,NCAPH,CENPO,CHEK1,GINS1,TIMELESS,KIF23,NCAPG,LMNB1,PCNA,CCNB2,HJURP,NCAPG2,ORC1,PLK4,TPX2,ZWILCH,CENPI,RFC5,TMPO,PARPBP,OIP5,RAD51,CDCA5,KIF2C,GTSE1,CENPK,DLGAP5,CDK1,ZWINT,UHRF1,FEN1,UBE2T,WDHD1,PRC1,MAD2L1,KIFC1,XRCC2,PRIM1,TTK,ASF1B,BRCA1,EZH2,CKAP2L,FBXO5,PLK1,KIF18A,KIF15,ORC6,RQCD1,SKA1,CENPA,CCNB1,KIF18B,CENPL,ATAD5,MCM2,SGOL1,CDK2,INCENP,CD…
GO:CC	non-membrane-bounded organelle	GO:0043228	1.7912e-35	34.7469	5102	98	87	18964	RACGAP1,MCM6,BUB1B,SPC25,KIF4A,NUSAP1,KIF11,BUB1,NCAPH,CENPO,CHEK1,GINS1,TIMELESS,KIF23,NCAPG,LMNB1,PCNA,CCNB2,HJURP,NCAPG2,ORC1,PLK4,TPX2,ZWILCH,CENPI,RFC5,TMPO,PARPBP,OIP5,RAD51,CDCA5,KIF2C,GTSE1,CENPK,DLGAP5,CDK1,ZWINT,UHRF1,FEN1,UBE2T,WDHD1,PRC1,MAD2L1,KIFC1,XRCC2,PRIM1,TTK,ASF1B,BRCA1,EZH2,CKAP2L,FBXO5,PLK1,KIF18A,KIF15,ORC6,RQCD1,SKA1,CENPA,CCNB1,KIF18B,CENPL,ATAD5,MCM2,SGOL1,CDK2,INCENP,CD…
GO:CC	chromosomal region	GO:0098687	4.58966e-35	34.3382	348	98	36	18964	MCM6,BUB1B,SPC25,BUB1,CENPO,CHEK1,NCAPG,PCNA,HJURP,ORC1,ZWILCH,CENPI,OIP5,RAD51,CDCA5,KIF2C,CENPK,CDK1,ZWINT,FEN1,MAD2L1,TTK,EZH2,PLK1,KIF18A,SKA1,CENPA,CENPL,MCM2,SGOL1,INCENP,CENPH,ERCC6L,DNA2,NEK2,SPDL1
GO:CC	spindle	GO:0005819	1.78408e-27	26.7486	390	98	32	18964	RACGAP1,BUB1B,KIF4A,NUSAP1,KIF11,KIF23,PLK4,TPX2,KIF2C,DLGAP5,CDK1,PRC1,MAD2L1,KIFC1,TTK,CKAP2L,FBXO5,PLK1,KIF18A,KIF15,SKA1,CCNB1,KIF18B,SGOL1,INCENP,CDC7,KIF14,NEK2,KIF20A,ASPM,ECT2,SPDL1
GO:CC	chromosome, centromeric region	GO:0000775	4.72119e-27	26.3259	200	98	26	18964	BUB1B,SPC25,BUB1,CENPO,NCAPG,HJURP,ZWILCH,CENPI,OIP5,CDCA5,KIF2C,CENPK,ZWINT,MAD2L1,TTK,PLK1,KIF18A,SKA1,CENPA,CENPL,SGOL1,INCENP,CENPH,ERCC6L,NEK2,SPDL1
GO:CC	nucleus	GO:0005634	7.53673e-26	25.1228	7607	98	91	18964	RACGAP1,MCM6,BUB1B,SPC25,KIF4A,NUSAP1,KIF11,BUB1,NCAPH,CENPO,CHEK1,GINS1,TIMELESS,KIF23,NCAPG,FANCI,LMNB1,PCNA,CCNB2,HJURP,NCAPG2,ORC1,PLK4,TPX2,CENPI,RFC5,TMPO,PARPBP,OIP5,RAD51,CDCA5,KIF2C,GTSE1,CENPK,DLGAP5,CDK1,ZWINT,UHRF1,FEN1,UBE2T,WDHD1,PRC1,MAD2L1,KIFC1,EXO1,XRCC2,SRSF7,PRIM1,TTK,ASF1B,SRSF2,BRCA1,EZH2,FBXO5,CCNA2,PLK1,KIF18A,ORC6,RQCD1,CENPA,CCNB1,KIF18B,CENPL,ATAD5,SRSF3,MCM2,SGOL1,CDK2…
GO:CC	condensed chromosome, centromeric region	GO:0000779	3.84443e-24	23.4152	144	98	22	18964	BUB1B,SPC25,BUB1,CENPO,NCAPG,ZWILCH,CENPI,KIF2C,CENPK,ZWINT,MAD2L1,TTK,PLK1,KIF18A,SKA1,CENPA,SGOL1,INCENP,CENPH,ERCC6L,NEK2,SPDL1
GO:CC	condensed chromosome	GO:0000793	1.74075e-23	22.7593	239	98	25	18964	BUB1B,SPC25,BUB1,CENPO,CHEK1,NCAPG,ZWILCH,CENPI,RAD51,KIF2C,CENPK,ZWINT,MAD2L1,TTK,BRCA1,PLK1,KIF18A,SKA1,CENPA,SGOL1,INCENP,CENPH,ERCC6L,NEK2,SPDL1
GO:CC	kinetochore	GO:0000776	2.88464e-23	22.5399	133	98	21	18964	BUB1B,SPC25,BUB1,CENPO,ZWILCH,CENPI,KIF2C,CENPK,ZWINT,MAD2L1,TTK,PLK1,KIF18A,SKA1,CENPA,SGOL1,INCENP,CENPH,ERCC6L,NEK2,SPDL1
GO:CC	nucleoplasm	GO:0005654	2.03637e-22	21.6911	4112	98	69	18964	RACGAP1,MCM6,KIF4A,BUB1,NCAPH,CENPO,CHEK1,GINS1,TIMELESS,KIF23,FANCI,LMNB1,PCNA,HJURP,NCAPG2,ORC1,TPX2,CENPI,RFC5,PARPBP,OIP5,RAD51,CDCA5,GTSE1,CENPK,CDK1,ZWINT,UHRF1,FEN1,UBE2T,WDHD1,PRC1,MAD2L1,EXO1,XRCC2,SRSF7,PRIM1,ASF1B,SRSF2,BRCA1,EZH2,FBXO5,CCNA2,PLK1,ORC6,CENPA,CCNB1,KIF18B,CENPL,SRSF3,MCM2,SGOL1,CDK2,INCENP,CDC7,CENPH,CLSPN,POLA2,DTL,DNA2,TRA2B,NEK2,MCM8,KIF20A,CDC25C,ECT2,RFC2,RFWD3,MCM…
GO:CC	nuclear lumen	GO:0031981	3.96176e-22	21.4021	4453	98	71	18964	RACGAP1,MCM6,KIF4A,NUSAP1,BUB1,NCAPH,CENPO,CHEK1,GINS1,TIMELESS,KIF23,FANCI,LMNB1,PCNA,HJURP,NCAPG2,ORC1,PLK4,TPX2,CENPI,RFC5,PARPBP,OIP5,RAD51,CDCA5,GTSE1,CENPK,CDK1,ZWINT,UHRF1,FEN1,UBE2T,WDHD1,PRC1,MAD2L1,EXO1,XRCC2,SRSF7,PRIM1,ASF1B,SRSF2,BRCA1,EZH2,FBXO5,CCNA2,PLK1,ORC6,CENPA,CCNB1,KIF18B,CENPL,SRSF3,MCM2,SGOL1,CDK2,INCENP,CDC7,CENPH,CLSPN,POLA2,DTL,DNA2,TRA2B,NEK2,MCM8,KIF20A,CDC25C,ECT2,RF…
GO:CC	microtubule cytoskeleton	GO:0015630	6.63448e-22	21.1782	1313	98	43	18964	RACGAP1,BUB1B,KIF4A,NUSAP1,KIF11,CHEK1,KIF23,PCNA,CCNB2,PLK4,TPX2,RAD51,KIF2C,GTSE1,DLGAP5,CDK1,PRC1,MAD2L1,KIFC1,XRCC2,TTK,CKAP2L,FBXO5,PLK1,KIF18A,KIF15,SKA1,CCNB1,KIF18B,SGOL1,CDK2,INCENP,CDC7,KIF14,CCNF,DTL,SASS6,NEK2,KIF20A,CEP78,ASPM,ECT2,SPDL1
GO:CC	supramolecular complex	GO:0099080	8.23905e-17	16.0841	1325	98	38	18964	RACGAP1,BUB1B,SPC25,KIF4A,NUSAP1,KIF11,BUB1,CENPO,KIF23,LMNB1,TPX2,ZWILCH,CENPI,KIF2C,GTSE1,CENPK,CDK1,ZWINT,PRC1,MAD2L1,KIFC1,TTK,PLK1,KIF18A,KIF15,RQCD1,SKA1,CENPA,KIF18B,SGOL1,INCENP,KIF14,CENPH,ERCC6L,NEK2,KIF20A,ASPM,SPDL1
GO:CC	intracellular organelle lumen	GO:0070013	4.68495e-16	15.3293	5579	98	71	18964	RACGAP1,MCM6,KIF4A,NUSAP1,BUB1,NCAPH,CENPO,CHEK1,GINS1,TIMELESS,KIF23,FANCI,LMNB1,PCNA,HJURP,NCAPG2,ORC1,PLK4,TPX2,CENPI,RFC5,PARPBP,OIP5,RAD51,CDCA5,GTSE1,CENPK,CDK1,ZWINT,UHRF1,FEN1,UBE2T,WDHD1,PRC1,MAD2L1,EXO1,XRCC2,SRSF7,PRIM1,ASF1B,SRSF2,BRCA1,EZH2,FBXO5,CCNA2,PLK1,ORC6,CENPA,CCNB1,KIF18B,CENPL,SRSF3,MCM2,SGOL1,CDK2,INCENP,CDC7,CENPH,CLSPN,POLA2,DTL,DNA2,TRA2B,NEK2,MCM8,KIF20A,CDC25C,ECT2,RF…
GO:CC	organelle lumen	GO:0043233	4.68495e-16	15.3293	5579	98	71	18964	RACGAP1,MCM6,KIF4A,NUSAP1,BUB1,NCAPH,CENPO,CHEK1,GINS1,TIMELESS,KIF23,FANCI,LMNB1,PCNA,HJURP,NCAPG2,ORC1,PLK4,TPX2,CENPI,RFC5,PARPBP,OIP5,RAD51,CDCA5,GTSE1,CENPK,CDK1,ZWINT,UHRF1,FEN1,UBE2T,WDHD1,PRC1,MAD2L1,EXO1,XRCC2,SRSF7,PRIM1,ASF1B,SRSF2,BRCA1,EZH2,FBXO5,CCNA2,PLK1,ORC6,CENPA,CCNB1,KIF18B,CENPL,SRSF3,MCM2,SGOL1,CDK2,INCENP,CDC7,CENPH,CLSPN,POLA2,DTL,DNA2,TRA2B,NEK2,MCM8,KIF20A,CDC25C,ECT2,RF…
GO:CC	membrane-enclosed lumen	GO:0031974	4.68495e-16	15.3293	5579	98	71	18964	RACGAP1,MCM6,KIF4A,NUSAP1,BUB1,NCAPH,CENPO,CHEK1,GINS1,TIMELESS,KIF23,FANCI,LMNB1,PCNA,HJURP,NCAPG2,ORC1,PLK4,TPX2,CENPI,RFC5,PARPBP,OIP5,RAD51,CDCA5,GTSE1,CENPK,CDK1,ZWINT,UHRF1,FEN1,UBE2T,WDHD1,PRC1,MAD2L1,EXO1,XRCC2,SRSF7,PRIM1,ASF1B,SRSF2,BRCA1,EZH2,FBXO5,CCNA2,PLK1,ORC6,CENPA,CCNB1,KIF18B,CENPL,SRSF3,MCM2,SGOL1,CDK2,INCENP,CDC7,CENPH,CLSPN,POLA2,DTL,DNA2,TRA2B,NEK2,MCM8,KIF20A,CDC25C,ECT2,RF…
GO:CC	mitotic spindle	GO:0072686	2.09403e-15	14.679	161	98	17	18964	RACGAP1,NUSAP1,KIF11,KIF23,TPX2,CDK1,PRC1,MAD2L1,KIFC1,CKAP2L,PLK1,KIF18A,SKA1,KIF18B,CDC7,ASPM,ECT2
GO:CC	intracellular organelle	GO:0043229	5.78411e-14	13.2378	13117	98	98	18964	RACGAP1,MCM6,BUB1B,SPC25,KIF4A,NUSAP1,KIF11,BUB1,NCAPH,CENPO,CHEK1,GINS1,TIMELESS,KIF23,NCAPG,FANCI,LMNB1,PCNA,CCNB2,HJURP,NCAPG2,ORC1,PLK4,TPX2,ZWILCH,CENPI,RFC5,TMPO,PARPBP,OIP5,RAD51,CDCA5,KIF2C,GTSE1,CENPK,DLGAP5,CDK1,ZWINT,UHRF1,FEN1,UBE2T,WDHD1,PRC1,MAD2L1,KIFC1,EXO1,XRCC2,SRSF7,PRIM1,TTK,ASF1B,SRSF2,BRCA1,EZH2,CKAP2L,FBXO5,CCNA2,PLK1,KIF18A,KIF15,ORC6,RQCD1,SKA1,CENPA,CCNB1,KIF18B,CENPL,AT…
GO:CC	cytoskeleton	GO:0005856	3.81247e-13	12.4188	2339	98	44	18964	RACGAP1,BUB1B,KIF4A,NUSAP1,KIF11,CHEK1,KIF23,LMNB1,PCNA,CCNB2,PLK4,TPX2,RAD51,KIF2C,GTSE1,DLGAP5,CDK1,PRC1,MAD2L1,KIFC1,XRCC2,TTK,CKAP2L,FBXO5,PLK1,KIF18A,KIF15,SKA1,CCNB1,KIF18B,SGOL1,CDK2,INCENP,CDC7,KIF14,CCNF,DTL,SASS6,NEK2,KIF20A,CEP78,ASPM,ECT2,SPDL1
GO:CC	nuclear chromosome	GO:0000228	1.46586e-12	11.8339	237	98	17	18964	MCM6,CHEK1,GINS1,TIMELESS,PCNA,ORC1,RAD51,WDHD1,PRIM1,BRCA1,PLK1,ORC6,MCM2,INCENP,POLA2,NEK2,MCM10
GO:CC	microtubule	GO:0005874	1.83158e-12	11.7372	435	98	21	18964	RACGAP1,KIF4A,NUSAP1,KIF11,KIF23,TPX2,KIF2C,GTSE1,CDK1,PRC1,KIFC1,PLK1,KIF18A,KIF15,SKA1,KIF18B,INCENP,KIF14,NEK2,KIF20A,ASPM
GO:CC	microtubule organizing center	GO:0005815	1.25476e-11	10.9014	815	98	26	18964	BUB1B,CHEK1,KIF23,PCNA,CCNB2,PLK4,RAD51,KIF2C,DLGAP5,CDK1,KIFC1,XRCC2,CKAP2L,PLK1,KIF18A,KIF15,CCNB1,SGOL1,CDK2,CCNF,DTL,SASS6,NEK2,CEP78,ASPM,SPDL1
GO:CC	replication fork	GO:0005657	1.26244e-11	10.8988	67	98	11	18964	CHEK1,TIMELESS,PCNA,RFC5,UHRF1,WDHD1,XRCC2,PRIM1,POLA2,RFC2,MCM10
GO:CC	organelle	GO:0043226	4.23899e-11	10.3727	14027	98	98	18964	RACGAP1,MCM6,BUB1B,SPC25,KIF4A,NUSAP1,KIF11,BUB1,NCAPH,CENPO,CHEK1,GINS1,TIMELESS,KIF23,NCAPG,FANCI,LMNB1,PCNA,CCNB2,HJURP,NCAPG2,ORC1,PLK4,TPX2,ZWILCH,CENPI,RFC5,TMPO,PARPBP,OIP5,RAD51,CDCA5,KIF2C,GTSE1,CENPK,DLGAP5,CDK1,ZWINT,UHRF1,FEN1,UBE2T,WDHD1,PRC1,MAD2L1,KIFC1,EXO1,XRCC2,SRSF7,PRIM1,TTK,ASF1B,SRSF2,BRCA1,EZH2,CKAP2L,FBXO5,CCNA2,PLK1,KIF18A,KIF15,ORC6,RQCD1,SKA1,CENPA,CCNB1,KIF18B,CENPL,AT…
GO:CC	spindle pole	GO:0000922	1.14802e-09	8.94005	168	98	13	18964	KIF11,PLK4,TPX2,DLGAP5,PRC1,MAD2L1,CKAP2L,PLK1,CCNB1,SGOL1,NEK2,ASPM,SPDL1
GO:CC	centrosome	GO:0005813	1.73781e-09	8.76	620	98	21	18964	CHEK1,KIF23,PCNA,CCNB2,PLK4,KIF2C,DLGAP5,CDK1,XRCC2,CKAP2L,PLK1,KIF15,CCNB1,SGOL1,CDK2,CCNF,DTL,SASS6,NEK2,CEP78,ASPM
GO:CC	kinesin complex	GO:0005871	1.75022e-09	8.75691	52	98	9	18964	KIF11,KIF23,KIF2C,KIFC1,KIF18A,KIF15,KIF18B,KIF14,KIF20A
GO:CC	intracellular membrane-bounded organelle	GO:0043231	4.57355e-09	8.33975	12046	98	91	18964	RACGAP1,MCM6,BUB1B,SPC25,KIF4A,NUSAP1,KIF11,BUB1,NCAPH,CENPO,CHEK1,GINS1,TIMELESS,KIF23,NCAPG,FANCI,LMNB1,PCNA,CCNB2,HJURP,NCAPG2,ORC1,PLK4,TPX2,CENPI,RFC5,TMPO,PARPBP,OIP5,RAD51,CDCA5,KIF2C,GTSE1,CENPK,DLGAP5,CDK1,ZWINT,UHRF1,FEN1,UBE2T,WDHD1,PRC1,MAD2L1,KIFC1,EXO1,XRCC2,SRSF7,PRIM1,TTK,ASF1B,SRSF2,BRCA1,EZH2,FBXO5,CCNA2,PLK1,KIF18A,ORC6,RQCD1,CENPA,CCNB1,KIF18B,CENPL,ATAD5,SRSF3,MCM2,SGOL1,CDK2…
GO:CC	intracellular anatomical structure	GO:0005622	8.73286e-09	8.05884	14808	98	98	18964	RACGAP1,MCM6,BUB1B,SPC25,KIF4A,NUSAP1,KIF11,BUB1,NCAPH,CENPO,CHEK1,GINS1,TIMELESS,KIF23,NCAPG,FANCI,LMNB1,PCNA,CCNB2,HJURP,NCAPG2,ORC1,PLK4,TPX2,ZWILCH,CENPI,RFC5,TMPO,PARPBP,OIP5,RAD51,CDCA5,KIF2C,GTSE1,CENPK,DLGAP5,CDK1,ZWINT,UHRF1,FEN1,UBE2T,WDHD1,PRC1,MAD2L1,KIFC1,EXO1,XRCC2,SRSF7,PRIM1,TTK,ASF1B,SRSF2,BRCA1,EZH2,CKAP2L,FBXO5,CCNA2,PLK1,KIF18A,KIF15,ORC6,RQCD1,SKA1,CENPA,CCNB1,KIF18B,CENPL,AT…
GO:CC	polymeric cytoskeletal fiber	GO:0099513	1.25209e-08	7.90236	766	98	22	18964	RACGAP1,KIF4A,NUSAP1,KIF11,KIF23,LMNB1,TPX2,KIF2C,GTSE1,CDK1,PRC1,KIFC1,PLK1,KIF18A,KIF15,SKA1,KIF18B,INCENP,KIF14,NEK2,KIF20A,ASPM
GO:CC	midbody	GO:0030496	1.32927e-07	6.87639	197	98	12	18964	RACGAP1,KIF4A,KIF23,CDK1,PRC1,PLK1,INCENP,KIF14,NEK2,KIF20A,ASPM,ECT2
GO:CC	cytosol	GO:0005829	1.74801e-07	6.75746	5361	98	57	18964	RACGAP1,BUB1B,SPC25,KIF4A,KIF11,BUB1,NCAPH,CENPO,CHEK1,KIF23,NCAPG,FANCI,CCNB2,ORC1,PLK4,TPX2,ZWILCH,CENPI,CDCA5,KIF2C,GTSE1,CENPK,DLGAP5,CDK1,ZWINT,PRC1,MAD2L1,SRSF2,CKAP2L,FBXO5,CCNA2,PLK1,KIF18A,KIF15,RQCD1,SKA1,CENPA,CCNB1,KIF18B,CENPL,SGOL1,CDK2,INCENP,KIF14,CENPH,ERCC6L,POLA2,CCNF,DTL,SASS6,NEK2,MCM8,CDC25C,CEP78,ECT2,RRM1,SPDL1
GO:CC	spindle midzone	GO:0051233	1.85031e-07	6.73276	36	98	7	18964	RACGAP1,PRC1,PLK1,KIF18A,KIF18B,INCENP,KIF14
GO:CC	protein-containing complex	GO:0032991	6.83009e-07	6.16557	5541	98	57	18964	RACGAP1,MCM6,BUB1B,SPC25,KIF11,NCAPH,CENPO,CHEK1,GINS1,TIMELESS,KIF23,NCAPG,PCNA,CCNB2,NCAPG2,ORC1,ZWILCH,RFC5,RAD51,KIF2C,CDK1,FEN1,MAD2L1,KIFC1,XRCC2,PRIM1,ASF1B,SRSF2,BRCA1,EZH2,CCNA2,KIF18A,KIF15,ORC6,RQCD1,SKA1,CENPA,CCNB1,KIF18B,ATAD5,MCM2,CDK2,INCENP,KIF14,POLA2,CCNF,DTL,DNA2,TRA2B,NEK2,MCM8,KIF20A,ECT2,RFC2,RRM1,SPDL1,MCM10
GO:CC	cyclin-dependent protein kinase holoenzyme complex	GO:0000307	6.93541e-07	6.15893	43	98	7	18964	PCNA,CCNB2,CDK1,CCNA2,CCNB1,CDK2,CCNF
GO:CC	membrane-bounded organelle	GO:0043227	9.59232e-07	6.01808	13201	98	92	18964	RACGAP1,MCM6,BUB1B,SPC25,KIF4A,NUSAP1,KIF11,BUB1,NCAPH,CENPO,CHEK1,GINS1,TIMELESS,KIF23,NCAPG,FANCI,LMNB1,PCNA,CCNB2,HJURP,NCAPG2,ORC1,PLK4,TPX2,CENPI,RFC5,TMPO,PARPBP,OIP5,RAD51,CDCA5,KIF2C,GTSE1,CENPK,DLGAP5,CDK1,ZWINT,UHRF1,FEN1,UBE2T,WDHD1,PRC1,MAD2L1,KIFC1,EXO1,XRCC2,SRSF7,PRIM1,TTK,ASF1B,SRSF2,BRCA1,EZH2,FBXO5,CCNA2,PLK1,KIF18A,ORC6,RQCD1,CENPA,CCNB1,KIF18B,CENPL,ATAD5,SRSF3,MCM2,SGOL1,CDK2…
GO:CC	spindle microtubule	GO:0005876	9.79856e-07	6.00884	71	98	8	18964	KIF4A,KIF11,CDK1,PRC1,PLK1,KIF18A,SKA1,KIF18B
GO:CC	supramolecular fiber	GO:0099512	1.76441e-06	5.7534	997	98	22	18964	RACGAP1,KIF4A,NUSAP1,KIF11,KIF23,LMNB1,TPX2,KIF2C,GTSE1,CDK1,PRC1,KIFC1,PLK1,KIF18A,KIF15,SKA1,KIF18B,INCENP,KIF14,NEK2,KIF20A,ASPM
GO:CC	supramolecular polymer	GO:0099081	2.04101e-06	5.69016	1005	98	22	18964	RACGAP1,KIF4A,NUSAP1,KIF11,KIF23,LMNB1,TPX2,KIF2C,GTSE1,CDK1,PRC1,KIFC1,PLK1,KIF18A,KIF15,SKA1,KIF18B,INCENP,KIF14,NEK2,KIF20A,ASPM
GO:CC	chromosome, telomeric region	GO:0000781	3.22946e-06	5.49087	160	98	10	18964	MCM6,CHEK1,PCNA,ORC1,RAD51,CDK1,FEN1,EZH2,MCM2,DNA2
GO:CC	microtubule associated complex	GO:0005875	4.09363e-06	5.38789	164	98	10	18964	KIF11,KIF23,KIF2C,KIFC1,KIF18A,KIF15,KIF18B,INCENP,KIF14,KIF20A
GO:CC	nuclear replication fork	GO:0043596	7.42293e-06	5.12942	35	98	6	18964	TIMELESS,PCNA,WDHD1,PRIM1,POLA2,MCM10
GO:CC	centralspindlin complex	GO:0097149	4.23507e-05	4.37314	3	98	3	18964	RACGAP1,KIF23,ECT2
GO:CC	nuclear body	GO:0016604	5.40111e-05	4.26752	816	98	18	18964	CENPO,PCNA,NCAPG2,CENPI,OIP5,RAD51,ZWINT,EXO1,SRSF7,SRSF2,BRCA1,KIF18B,SRSF3,CDK2,INCENP,CDC25C,ECT2,RFWD3
GO:CC	serine/threonine protein kinase complex	GO:1902554	0.000113083	3.9466	88	98	7	18964	PCNA,CCNB2,CDK1,CCNA2,CCNB1,CDK2,CCNF
GO:CC	protein kinase complex	GO:1902911	0.00035381	3.45123	104	98	7	18964	PCNA,CCNB2,CDK1,CCNA2,CCNB1,CDK2,CCNF
GO:CC	transferase complex, transferring phosphorus-containing groups	GO:0061695	0.000373168	3.4281	266	98	10	18964	PCNA,CCNB2,CDK1,PRIM1,CCNA2,CCNB1,CDK2,POLA2,CCNF,DNA2
GO:CC	condensed nuclear chromosome	GO:0000794	0.000664664	3.1774	73	98	6	18964	CHEK1,RAD51,BRCA1,PLK1,INCENP,NEK2
GO:CC	condensin complex	GO:0000796	0.00232743	2.63312	8	98	3	18964	NCAPH,NCAPG,NCAPG2
GO:CC	nuclear origin of replication recognition complex	GO:0005664	0.00347804	2.45866	9	98	3	18964	ORC1,ORC6,MCM2
GO:CC	origin recognition complex	GO:0000808	0.00347804	2.45866	9	98	3	18964	ORC1,ORC6,MCM2
GO:CC	CMG complex	GO:0071162	0.00494999	2.3054	10	98	3	18964	MCM6,GINS1,MCM2
GO:CC	outer kinetochore	GO:0000940	0.00494999	2.3054	10	98	3	18964	BUB1B,SKA1,SPDL1
GO:CC	cytoplasm	GO:0005737	0.00544794	2.26377	11951	98	81	18964	RACGAP1,BUB1B,SPC25,KIF4A,NUSAP1,KIF11,BUB1,NCAPH,CENPO,CHEK1,GINS1,KIF23,NCAPG,FANCI,CCNB2,HJURP,ORC1,PLK4,TPX2,ZWILCH,CENPI,TMPO,PARPBP,RAD51,CDCA5,KIF2C,GTSE1,CENPK,DLGAP5,CDK1,ZWINT,FEN1,WDHD1,PRC1,MAD2L1,KIFC1,XRCC2,SRSF7,TTK,SRSF2,BRCA1,EZH2,CKAP2L,FBXO5,CCNA2,PLK1,KIF18A,KIF15,RQCD1,SKA1,CENPA,CCNB1,KIF18B,CENPL,SRSF3,MCM2,SGOL1,CDK2,INCENP,CDC7,KIF14,CENPH,CLSPN,ERCC6L,POLA2,CCNF,DTL,DNA2…
GO:CC	cyclin B1-CDK1 complex	GO:0097125	0.00836515	2.07753	2	98	2	18964	CDK1,CCNB1
GO:CC	DNA replication preinitiation complex	GO:0031261	0.00900701	2.04542	12	98	3	18964	MCM6,GINS1,MCM2
GO:CC	MCM complex	GO:0042555	0.00900701	2.04542	12	98	3	18964	MCM6,MCM2,MCM8
GO:CC	intercellular bridge	GO:0045171	0.0145419	1.83738	76	98	5	18964	KIF23,TPX2,PRC1,CDC7,KIF20A
GO:CC	mitotic spindle midzone	GO:1990023	0.0147909	1.83	14	98	3	18964	PRC1,KIF18A,KIF18B
GO:CC	transferase complex	GO:1990234	0.018134	1.74151	795	98	14	18964	BUB1B,PCNA,CCNB2,CDK1,PRIM1,BRCA1,EZH2,CCNA2,CCNB1,CDK2,POLA2,CCNF,DTL,DNA2
GO:CC	meiotic spindle	GO:0072687	0.0184194	1.73473	15	98	3	18964	FBXO5,INCENP,ASPM
GO:CC	lateral element	GO:0000800	0.0184194	1.73473	15	98	3	18964	RAD51,BRCA1,INCENP
GO:CC	synaptonemal structure	GO:0099086	0.0204284	1.68977	42	98	4	18964	RAD51,BRCA1,PLK1,INCENP
GO:CC	synaptonemal complex	GO:0000795	0.0204284	1.68977	42	98	4	18964	RAD51,BRCA1,PLK1,INCENP
GO:CC	replication fork protection complex	GO:0031298	0.0250107	1.60187	3	98	2	18964	TIMELESS,MCM10
GO:CC	inner kinetochore	GO:0000939	0.0250107	1.60187	3	98	2	18964	CENPO,CENPA
GO:CC	protein-DNA complex	GO:0032993	0.0365868	1.43668	212	98	7	18964	MCM6,GINS1,PCNA,PRIM1,CENPA,MCM2,POLA2
GO:CC	DNA polymerase complex	GO:0042575	0.0452915	1.34398	20	98	3	18964	PRIM1,POLA2,DNA2
