# Supplementary material for: Pan-cancer analysis of non-oncogene addiction to DNA repair
Source: Research Square preprint supplement (doi:10.21203/rs.3.rs-846744/v1), 2021-09-03
Supplement: Supplementary file 11 [file b5ffb0c3a729147128e6d26e.xlsx]

## Sheet: Supp Table 2
EntrezID	Gene	ACH-000004	ACH-000005	ACH-000007	ACH-000009	ACH-000012	ACH-000014	ACH-000015	ACH-000017	ACH-000018	ACH-000019	ACH-000021	ACH-000025	ACH-000028	ACH-000029	ACH-000030	ACH-000035	ACH-000036	ACH-000039	ACH-000040	ACH-000041	ACH-000042	ACH-000045	ACH-000052	ACH-000054	ACH-000055	ACH-000060	ACH-000067	ACH-000070	ACH-000075	ACH-000086	ACH-000087	ACH-000092	ACH-000095	ACH-000096	ACH-000097	ACH-000098	ACH-000108	ACH-000113	ACH-000115	ACH-000118	ACH-000123	ACH-000127	ACH-000128	ACH-000132	ACH-000133	ACH-000138	ACH-000142	ACH-000143
84126	ATRIP	-0.4041	-0.3917	-0.5283	-0.3303	-0.6607	-0.5228	-0.6047	-0.4221	-0.5232	-0.5293	-0.5025	-0.4154	-0.6051	-0.7084	-0.5352	-0.581	-0.5732	-0.5947	-0.239	-0.6526	-0.7166	-0.3945	-0.931	-0.3841	-0.6034	-0.4989	-0.4766	-0.4683	-0.6166	-0.3715	-0.5829	-0.4806	-0.3646	-0.54	-0.4166	-0.4688	-0.624	-0.5409	-0.3545	-0.5058	-0.557	-0.4047	-0.5712	-0.3962	-0.4975	-0.6545	-0.5774	-0.5023
83990	BRIP1	-0.5054	-0.1433	-0.045	-0.3579	-0.1286	-0.3303	-0.2952	-0.1666	-0.2214	-0.3347	-0.3388	-0.1461	-0.5103	-0.1964	-0.2413	-0.3077	-0.2453	-0.2184	-0.3477	-0.3829	-0.2163	-0.5905	-0.4833	-0.3409	-0.3629	-0.3133	-0.3971	-0.5217	-0.3044	-0.327	-0.3557	-0.1614	-0.5273	-0.4303	-0.2928	-0.4167	-0.2508	-0.5795	-0.33	-0.5375	-0.2361	-0.1509	-0.0988	-0.1992	-0.2688	-0.2565	-0.3303	-0.2614
902	CCNH	-0.7342	-0.9693	-0.5693	-0.4737	-0.6123	-0.6997	-0.7917	-0.7411	-0.6554	-0.5259	-0.7798	-0.332	-0.6148	-0.9488	-0.5964	-0.615	-0.6943	-0.6522	-0.6857	-0.9179	-0.8224	-0.7993	-0.8294	-0.6246	-0.8538	-0.6175	-0.7719	-0.709	-0.6028	-0.7148	-1.0174	-0.4905	-0.5018	-0.725	-0.8398	-0.6523	-0.8837	-0.7632	-0.8534	-0.7292	-0.7784	-0.6687	-0.5114	-0.6076	-0.6042	-0.7633	-0.7279	-0.7143
988	CDC5L	-1.2883	-1.3801	-1.4693	-1.4335	-1.2891	-1.3075	-1.2714	-1.5511	-1.0565	-1.544	-1.2076	-1.0316	-1.2438	-1.2623	-1.4126	-1.3408	-1.3496	-1.6045	-1.0028	-1.4632	-1.3127	-1.5419	-1.2456	-1.1007	-1.2046	-1.2395	-1.3684	-1.364	-1.2145	-0.9232	-1.1726	-1.1064	-1.4582	-1.2491	-1.3745	-1.0017	-1.3085	-1.3164	-1.8793	-1.4058	-1.3544	-1.4336	-1.4951	-1.0123	-1.1072	-1.1747	-1.3278	-1.4274
1022	CDK7	-0.9767	-1.5473	-1.0225	-1.0609	-1.1445	-1.1856	-1.1803	-0.9996	-0.8598	-0.8462	-1.1209	-1.19	-1.0776	-0.9635	-1.1956	-0.8569	-1.1091	-1.071	-1.1204	-1.5325	-1.1988	-1.2568	-1.1879	-1.0018	-1.2673	-1.1158	-0.8787	-1.3617	-1.1857	-0.8835	-1.1306	-1.0614	-1.2029	-1.1117	-1.0782	-1.0054	-1.1741	-1.1643	-1.3163	-0.9002	-0.9636	-1.1861	-1.2373	-1.049	-1.0059	-1.0664	-1.2271	-1.2246
10036	CHAF1A	-1.0938	-1.1344	-0.8894	-0.9249	-1.0976	-1.1249	-1.5112	-0.9719	-1.118	-1.239	-0.8186	-1.0626	-1.0569	-1.0252	-1.0395	-1.2506	-0.9581	-1.1063	-0.8711	-1.3869	-0.7001	-0.9141	-1.0852	-0.9411	-0.9821	-1.2568	-1.1945	-1.0668	-0.9547	-1.1544	-1.1512	-0.9441	-0.8485	-1.0419	-1.2395	-1.0767	-1.1055	-1.2688	-1.5391	-1.1479	-1.2099	-0.9152	-1.1533	-1.0883	-1.1389	-1.0956	-0.959	-0.8982
1111	CHEK1	-0.9777	-1.0643	-1.0387	-0.9784	-1.0776	-1.1886	-0.9348	-1.2577	-0.7886	-1.0764	-0.7938	-0.9235	-1.0881	-0.969	-0.9501	-0.8693	-0.8964	-1.2703	-0.7885	-1.1321	-0.7022	-1.1044	-0.852	-0.8563	-1.0277	-0.8587	-0.9515	-1.3564	-1.3015	-0.9936	-0.9025	-1.1662	-1.2146	-1.1041	-1.0702	-0.8102	-0.8464	-1.1026	-1.4962	-1.2352	-1.1124	-1.0277	-0.7865	-0.9327	-1.2665	-1.0839	-1.0151	-1.1403
1196	CLK2	-0.4645	-0.5047	-0.3497	-0.4455	-0.2381	-0.2338	-0.3056	-0.3526	-0.0863	-0.0658	-0.2704	-0.3507	-0.1948	-0.2348	-0.2316	-0.216	-0.2277	-0.5562	-0.2193	-0.3736	-0.2063	-0.4309	-0.1865	-0.2864	-0.484	-0.2753	-0.2409	-0.2489	-0.2581	-0.3157	-0.4296	-0.3884	-0.3719	-0.1684	-0.3976	-0.4014	-0.2204	-0.5263	-0.4027	-0.2932	-0.2714	-0.3056	-0.277	-0.082	-0.4235	-0.4736	-0.3759	-0.3516
1642	DDB1	-1.4613	-1.7818	-1.5224	-1.2602	-1.506	-1.229	-1.5118	-1.1623	-1.1897	-1.3251	-1.4091	-1.443	-1.4587	-1.3465	-1.3145	-1.2315	-1.3508	-1.5218	-1.4531	-1.3571	-1.5814	-1.3724	-1.3448	-1.2985	-1.4979	-1.3396	-1.1491	-1.1477	-1.4171	-1.2639	-1.2779	-1.4102	-1.3843	-1.3559	-1.5806	-1.5948	-1.4979	-1.3131	-1.3146	-1.4054	-1.4706	-1.407	-1.3725	-1.3628	-1.4198	-1.4277	-1.4741	-1.3752
1854	DUT	-1.2542	-1.264	-1.4872	-1.2168	-1.1393	-1.1373	-0.9828	-1.1765	-0.8858	-0.9694	-1.1213	-0.9771	-1.0713	-1.0307	-0.9807	-1.0266	-0.8379	-1.3826	-0.8721	-1.2888	-1.159	-1.0021	-0.94	-0.8586	-1.0265	-1.0819	-1.2063	-1.045	-0.9234	-0.6651	-1.0968	-1.039	-1.1813	-1.0234	-1.1642	-0.8678	-1.2567	-0.9862	-1.1201	-1.0433	-1.0064	-1.0354	-1.1888	-0.9575	-0.847	-1.0361	-0.946	-1.026
2068	ERCC2	-0.5981	-0.5685	-1.0485	-1.0393	-0.6323	-0.5608	-0.7697	-0.6956	-0.7829	-0.5526	-0.8144	-0.67	-0.5854	-0.5754	-0.8156	-0.726	-0.5375	-0.7503	-0.6862	-0.6991	-0.9794	-0.7102	-0.7201	-0.6758	-0.7382	-0.7498	-0.759	-0.9699	-0.5706	-0.9426	-0.7652	-0.8172	-0.5588	-0.8893	-0.6812	-0.7376	-0.9442	-0.7423	-0.8787	-0.7265	-0.7281	-0.496	-0.677	-0.7915	-0.659	-0.7051	-0.9723	-0.7517
2071	ERCC3	-0.2897	-0.473	-0.3337	-0.1632	-0.278	-0.4572	-0.2094	-0.2542	-0.4639	-0.3097	-0.2017	-0.3698	-0.2422	-0.3943	-0.0923	-0.4197	-0.2939	-0.3527	-0.4719	-0.4244	-0.3381	-0.2735	-0.5091	-0.4638	-0.4108	-0.4603	-0.4573	-0.2121	-0.5306	-0.4344	-0.4089	-0.3639	-0.3825	-0.2667	-0.3379	-0.446	-0.3677	-0.2478	-0.2683	-0.3537	-0.2422	-0.3605	-0.4421	-0.446	-0.4099	-0.2351	-0.3002	-0.3615
2072	ERCC4	-0.3337	-0.2176	-0.1737	-0.1458	-0.3046	-0.2534	-0.1589	-0.0335	-0.2201	-0.1721	-0.4017	-0.2938	-0.1787	-0.0399	-0.2157	-0.3678	-0.3327	-0.3151	-0.288	-0.186	-0.2088	-0.295	-0.2186	-0.078	-0.2626	-0.2549	-0.1957	-0.286	-0.1894	-0.2342	-0.2761	-0.2326	-0.2973	-0.247	-0.2306	-0.358	-0.3099	-0.3616	-0.1984	-0.3191	-0.4227	-0.2881	-0.081	-0.2496	-0.1472	-0.1688	-0.2867	-0.1079
2965	GTF2H1	-0.5067	-0.895	-0.4821	-0.5633	-0.5853	-0.5708	-0.526	-0.3779	-0.3674	-0.4351	-0.5352	-0.5633	-0.5037	-0.6589	-0.5131	-0.7802	-0.4516	-0.7191	-0.3659	-0.9072	-0.5411	-0.5973	-0.6413	-0.5425	-0.241	-0.3727	-0.6537	-0.6055	-0.352	-0.4298	-0.8706	-0.5985	-0.6053	-0.3993	-0.4211	-0.8621	-0.614	-0.544	-0.7695	-0.4961	-0.4738	-0.3548	-0.605	-0.6358	-0.3971	-0.7929	-0.497	-0.4933
2966	GTF2H2	-0.3386	-0.45	-0.3161	-0.4407	-0.4474	-0.4068	-0.429	-0.1254	-0.498	-0.2595	-0.2776	-0.304	-0.2871	-0.3293	-0.4632	-0.2038	-0.5878	-0.5547	-0.2546	-0.6282	-0.3201	-0.2503	-0.3947	-0.196	-0.3339	-0.2443	-0.5784	-0.425	-0.5344	-0.3783	-0.281	-0.1711	-0.2187	-0.3273	-0.4962	-0.4314	-0.4324	-0.253	-0.2031	-0.3544	-0.187	-0.4549	-0.5083	-0.38	-0.213	-0.3977	-0.5632	-0.3651
2967	GTF2H3	-0.4147	-0.3069	-0.2546	-0.2979	-0.5035	-0.3404	-0.3719	-0.245	-0.4802	-0.1732	-0.3657	-0.3698	-0.3067	-0.3668	-0.3832	-0.3466	-0.6333	-0.3866	-0.3557	-0.355	-0.4307	-0.4747	-0.3731	-0.4302	-0.3659	-0.2728	-0.4376	-0.4955	-0.1762	-0.3869	-0.5687	-0.5147	-0.282	-0.2465	-0.4034	-0.4492	-0.3647	-0.4898	-0.4725	-0.2857	-0.5264	-0.14	-0.486	-0.5689	-0.4044	-0.3675	-0.4648	-0.2802
2968	GTF2H4	-0.5436	-0.4463	-0.6972	-0.7095	-0.8326	-0.6505	-0.5615	-0.4424	-0.7486	-0.4646	-0.47	-0.6945	-0.6874	-0.7147	-0.472	-0.6866	-0.8186	-0.6239	-0.791	-0.6077	-0.6893	-0.4886	-0.5673	-0.6233	-0.4693	-0.6486	-0.9122	-0.51	-0.7398	-0.8931	-0.7385	-0.6376	-0.7261	-0.6863	-0.6053	-0.8621	-0.5853	-0.7077	-0.7876	-0.4168	-0.5969	-0.7275	-0.8485	-0.7773	-0.5498	-0.6223	-0.866	-0.8354
3014	H2AFX	-0.2388	-0.5939	-0.5456	-0.3697	-0.3214	-0.7021	-0.3234	-0.4532	-0.314	-0.6509	-0.1928	-0.5838	-0.5193	-0.3407	-0.3487	-0.4843	-0.3806	-0.4397	-0.4562	-0.3004	-0.1386	-0.2938	-0.2856	-0.2827	-0.288	-0.2881	-0.2803	-0.5044	-0.4646	-0.383	-0.3367	-0.2661	-0.3679	-0.339	-0.4602	-0.2728	-0.3333	-0.4488	-0.2362	-0.54	-0.2345	-0.3137	-0.322	-0.5078	-0.3464	-0.412	-0.4376	-0.273
8924	HERC2	-0.5249	-0.2873	-0.3428	-0.655	-0.4419	-0.2816	-0.2979	-0.3078	-0.3351	-0.09	-0.125	-0.4008	-0.1585	-0.4859	-0.3325	-0.3593	-0.3901	-0.1965	-0.1432	-0.2438	-0.0823	-0.2525	-0.3129	-0.1674	-0.3053	-0.0613	-0.3634	-0.2769	-0.2441	-0.2139	-0.3527	-0.231	-0.311	-0.1695	-0.1077	-0.1994	-0.2316	-0.2151	-0.0501	-0.2385	-0.4204	-0.3205	-0.1582	-0.4561	-0.2833	-0.2387	-0.3206	-0.526
10524	KAT5	-0.4179	-0.3848	-0.6632	-0.6414	-0.5892	-0.5144	-0.6384	-0.5062	-0.5152	-0.5821	-0.6627	-0.6092	-0.3685	-0.6225	-0.6102	-0.6055	-0.6564	-0.6063	-0.6842	-0.6086	-0.5195	-0.6472	-0.827	-0.5361	-0.6293	-0.6892	-0.4538	-0.5677	-0.5439	-0.7064	-0.4075	-0.6651	-0.7987	-0.8522	-0.504	-0.5648	-0.3958	-0.8302	-0.4796	-0.5504	-0.7495	-0.5129	-0.6652	-0.62	-0.5076	-0.507	-0.6623	-0.6173
3980	LIG3	-0.3308	-0.3557	-0.2698	-0.2781	-0.4533	-0.3233	-0.1747	-0.1738	-0.3817	-0.3915	-0.2815	-0.2444	-0.4172	-0.3582	-0.3282	-0.3693	-0.2004	-0.3692	-0.1398	-0.1544	-0.197	-0.2561	-0.3029	-0.1906	-0.1896	-0.1521	-0.2533	-0.0696	-0.2802	-0.3394	-0.1277	-0.1389	-0.1236	-0.2266	-0.2375	-0.1333	-0.2362	-0.2913	-0.4608	-0.5411	-0.2844	-0.2956	-0.2613	-0.3191	-0.0731	-0.3574	-0.3704	-0.126
4331	MNAT1	-0.7539	-0.7676	-0.8773	-0.8459	-0.6539	-0.8694	-0.7538	-0.2808	-0.6145	-0.4073	-0.755	-0.6957	-0.5442	-0.689	-0.4748	-0.7214	-0.8848	-0.7321	-0.5423	-1.0441	-0.7621	-0.6862	-0.6355	-0.6358	-0.654	-0.787	-0.6649	-0.9867	-0.542	-0.7298	-0.683	-0.6023	-0.5804	-0.6848	-0.6727	-0.7496	-0.9765	-0.7308	-0.7262	-0.6213	-0.6022	-0.4778	-0.5713	-0.7028	-0.7189	-0.6919	-0.6183	-0.8916
80198	MUS81	-0.1848	-0.4522	-0.1855	-0.1369	-0.2974	-0.1182	-0.1204	-0.1612	-0.1573	-0.1414	-0.2818	-0.1369	-0.4151	-0.2388	-0.1818	-0.1899	-0.4346	-0.4519	-0.1484	-0.195	-0.2528	-0.3913	-0.0621	-0.1217	-0.2351	-0.1897	-0.2983	-0.2517	-0.459	-0.4566	-0.1942	-0.1379	-0.1139	-0.3511	-0.212	-0.0971	-0.227	-0.3972	-0.2744	-0.3909	-0.2191	-0.0671	-0.0151	-0.2802	-0.1845	-0.3703	-0.2013	-0.0309
84901	NFATC2IP	-0.2586	-0.198	-0.1598	-0.2766	-0.2575	-0.1714	-0.5653	-0.133	-0.4544	-0.2821	-0.3544	-0.3197	-0.3009	-0.454	-0.1275	-0.4593	-0.3097	-0.4989	-0.2482	-0.3778	-0.2964	-0.323	-0.6111	-0.2473	-0.3749	-0.3026	-0.2969	-0.03	-0.2446	-0.1317	-0.4395	-0.3215	-0.3734	-0.2858	-0.3848	-0.3612	-0.1612	-0.4451	-0.2477	-0.1966	-0.4913	-0.374	-0.2513	-0.3644	-0.2193	-0.3861	-0.33	-0.3783
79840	NHEJ1	-0.2449	-0.1318	-0.2023	-0.2205	-0.174	-0.2059	-0.0585	-0.1201	-0.1777	-0.3173	-0.0548	-0.1697	-0.3328	-0.1203	-0.2494	-0.1595	-0.2266	-0.3905	-0.2079	-0.1414	-0.2633	-0.2069	-0.4384	-0.1896	-0.2234	-0.263	-0.2546	-0.215	-0.2319	-0.1115	-0.57	-0.1501	-0.1742	-0.3671	-0.194	-0.2767	-0.2081	-0.1072	-0.1415	-0.1012	-0.1748	-0.1739	-0.1685	-0.1101	-0.1702	-0.1888	-0.1726	0.0398
56160	NSMCE3	-0.7261	-0.4909	-0.7223	-0.5928	-0.6884	-0.67	-0.7775	-0.6111	-0.5844	-0.6235	-0.911	-0.7446	-0.6658	-0.8853	-0.6017	-0.8162	-0.7041	-0.639	-0.8402	-0.6872	-0.953	-0.7134	-0.9832	-0.6698	-0.8807	-0.5791	-0.952	-0.6951	-0.6875	-0.7222	-0.5583	-0.7588	-0.7811	-0.6648	-0.773	-0.7112	-0.6369	-0.7798	-0.4647	-0.8567	-0.5971	-0.6644	-0.6856	-0.57	-0.7503	-0.5901	-0.8377	-0.8455
5111	PCNA	-1.8902	-2.0224	-1.22	-1.3635	-1.5538	-1.3861	-1.4176	-1.2475	-0.9724	-1.7565	-1.7382	-1.223	-1.508	-1.6235	-1.4621	-1.339	-1.4071	-1.3639	-1.034	-1.6494	-1.26	-1.5645	-1.2327	-1.3498	-1.5829	-1.541	-1.4667	-1.5075	-1.1293	-1.162	-1.6175	-1.3982	-1.6167	-1.2052	-1.7298	-1.2738	-1.6133	-1.6695	-1.6536	-1.6907	-1.4191	-1.3557	-1.3554	-1.2363	-1.8414	-1.48	-1.2943	-1.5753
5356	PLRG1	-1.0094	-0.9134	-1.0608	-1.1553	-0.973	-0.7688	-0.9507	-0.9629	-0.7978	-0.9928	-1.0385	-0.9057	-1.1113	-1.1942	-0.9978	-0.8484	-1.0714	-1.0863	-1.0107	-1.1242	-0.7707	-0.8657	-1.0322	-0.7774	-1.0559	-1.242	-0.5462	-1.3269	-0.8416	-0.8561	-0.8193	-1.0013	-1.0874	-0.8718	-0.8821	-0.9369	-0.9839	-1.1788	-1.1415	-1.0035	-0.8762	-0.9966	-1.0726	-0.8771	-0.7242	-0.6599	-1.0778	-0.9527
11284	PNKP	-0.3371	-0.2908	-0.4899	-0.4646	-0.5209	-0.5613	-0.5347	-0.0463	-0.4917	-0.4687	-0.4752	-0.3639	-0.3442	-0.4761	-0.5935	-0.2205	-0.5673	-0.4792	-0.4943	-0.7771	-0.3771	-0.4437	-0.4989	-0.4252	-0.5704	-0.5078	-0.5723	-0.4499	-0.7382	-0.4932	-0.4792	-0.6198	-0.595	-0.3973	-0.4005	-0.8851	-0.6444	-0.3095	-0.4635	-0.5399	-0.5221	-0.5361	-0.6139	-0.4907	-0.617	-0.7134	-0.5338	-0.408
5424	POLD1	-0.6222	-0.8637	-0.9099	-0.9899	-0.9377	-0.8254	-0.8181	-0.9449	-0.9026	-1.1492	-1.1781	-0.6403	-0.8649	-1.0093	-0.9128	-0.9231	-0.8359	-1.1575	-0.8984	-1.2313	-0.944	-0.8538	-1.3077	-0.9231	-1.0141	-0.9623	-1.0448	-0.5994	-0.9677	-0.8493	-0.8367	-0.7764	-1.1242	-0.8428	-0.8933	-0.9864	-0.8514	-0.9923	-0.7497	-0.9303	-1.0812	-0.9934	-0.8947	-0.7063	-0.977	-0.7539	-1.1638	-0.888
5425	POLD2	-1.0563	-0.7675	-0.6868	-0.8035	-0.6291	-0.5771	-0.5582	-0.4912	-0.6789	-0.7333	-0.6267	-0.6572	-0.4917	-0.4955	-0.541	-0.5343	-0.614	-0.7935	-0.6406	-0.636	-0.5876	-0.8018	-0.7773	-0.573	-0.7826	-0.684	-0.5994	-0.6451	-0.5536	-0.4106	-0.5366	-0.6372	-0.8046	-0.8623	-0.3226	-0.4515	-0.4823	-0.8196	-0.599	-0.5325	-0.8687	-0.4889	-0.9854	-0.5258	-0.5887	-0.4831	-0.7638	-0.6463
10714	POLD3	-1.2005	-0.9667	-0.8943	-0.8624	-1.025	-1.0162	-1.094	-0.8315	-0.8724	-1.2135	-1.0988	-0.9121	-1.022	-0.963	-0.8841	-0.9297	-1.0362	-0.9212	-0.8904	-1.0597	-1.0275	-1.0183	-0.7792	-0.956	-1.0364	-0.9844	-1.1316	-1.0307	-1.131	-0.8935	-0.9857	-1.2348	-1.2554	-1.2306	-1.0094	-1.1084	-0.9202	-1.1239	-0.9193	-0.9134	-0.884	-0.7283	-1.14	-0.8614	-0.7298	-1.0544	-1.0986	-1.0504
5426	POLE	-1.4496	-1.2537	-1.1434	-1.1875	-1.1813	-1.4273	-1.0519	-0.9047	-1.0659	-1.0589	-1.2887	-1.2777	-1.0058	-1.0815	-1.0554	-0.9266	-1.1368	-1.2559	-1.0705	-0.9506	-1.077	-0.9279	-1.0335	-1.1175	-1.3359	-1.065	-1.1738	-1.1557	-1.1955	-0.9391	-0.9583	-1.2909	-1.3771	-1.4994	-1.0798	-1.0451	-0.992	-1.3003	-1.1922	-1.1428	-1.1881	-1.1896	-1.1471	-0.7114	-1.7228	-1.0287	-0.9116	-1.1867
5427	POLE2	-1.3342	-1.3936	-1.4602	-1.1301	-1.1487	-1.4387	-0.8512	-1.2779	-1.229	-0.963	-1.0555	-1.271	-1.1937	-1.2593	-1.2491	-1.1542	-1.3898	-1.0556	-1.2833	-1.3314	-1.0344	-1.0272	-1.1121	-1.2327	-1.2992	-1.1342	-1.123	-1.2717	-1.1339	-1.2573	-1.1527	-1.3192	-1.1875	-1.1323	-1.2724	-1.303	-1.3186	-1.3167	-1.6629	-1.1301	-0.9717	-1.2126	-1.1148	-0.9037	-1.6472	-0.966	-1.0641	-1.2994
10721	POLQ	-0.5524	-0.0851	-0.2087	-0.2921	-0.2949	-0.3847	-0.1433	-0.2014	-0.211	-0.5825	-0.3678	-0.3497	-0.2855	-0.1998	-0.1964	-0.3948	-0.553	-0.4743	-0.2214	-0.2908	-0.2433	-0.3684	-0.2373	-0.2823	-0.1809	-0.1448	-0.5429	-0.3066	-0.454	-0.4655	-0.2211	-0.1281	-0.2418	-0.1486	-0.4007	-0.2696	-0.3521	-0.3373	-0.1462	-0.3102	-0.3253	-0.1479	-0.2595	-0.3254	-0.2441	-0.2866	-0.1428	-0.427
5531	PPP4C	-1.1807	-1.0221	-0.8739	-1.0348	-0.9756	-1.0195	-1.0858	-0.8682	-0.7875	-0.7224	-0.8592	-0.8321	-0.8047	-1.1109	-0.7937	-0.7936	-0.8267	-0.8832	-0.554	-1.2631	-1.0998	-0.6935	-0.7571	-0.669	-0.9174	-0.7607	-0.5096	-0.9871	-0.8418	-0.9238	-0.8072	-0.8215	-0.9044	-0.8526	-0.7636	-0.7426	-0.7287	-0.9035	-0.8567	-0.9998	-0.9074	-0.7789	-1.0377	-0.811	-0.6926	-0.834	-0.9474	-0.8105
27339	PRPF19	-1.8587	-1.8317	-1.6483	-1.6354	-1.666	-1.3396	-1.4775	-1.5056	-1.4132	-1.3243	-1.8114	-1.5371	-1.3197	-1.5133	-1.548	-1.6835	-1.7088	-1.6064	-1.5742	-1.7436	-1.6117	-1.5425	-1.5663	-1.2915	-1.6557	-1.6688	-1.5451	-1.7173	-1.6016	-1.9885	-1.6609	-1.5025	-1.6995	-1.4532	-1.6397	-2.114	-1.517	-1.6101	-1.8491	-1.6784	-1.6103	-1.4898	-2.0314	-1.3745	-1.5583	-1.5435	-1.6901	-1.6557
5892	RAD51D	-0.7373	-0.3728	-0.667	-0.8299	-0.6884	-0.6461	-0.5781	-0.4722	-0.7189	-0.7162	-0.7568	-0.7758	-0.7167	-0.7353	-0.7058	-0.6355	-0.7872	-0.6347	-0.5305	-0.5938	-0.4276	-0.731	-0.768	-0.5414	-0.7738	-0.8549	-0.9682	-0.6767	-0.7399	-0.2842	-0.8156	-0.5751	-0.4335	-0.6978	-0.5579	-0.7086	-0.5858	-0.5916	-0.5908	-0.8567	-0.7277	-0.7595	-0.6379	-0.6391	-0.5869	-0.3987	-0.6357	-0.7971
5980	REV3L	-0.6275	-0.5514	-0.5904	-0.3539	-0.3995	-0.5016	-0.4339	-0.5823	-0.5817	-0.3197	-0.4839	-0.5377	-0.509	-0.5911	-0.4822	-0.601	-0.4288	-0.4096	-0.5304	-0.6326	-0.4815	-0.5295	-0.5241	-0.5427	-0.4331	-0.3656	-0.4748	-0.524	-0.3398	-0.308	-0.566	-0.4812	-0.5331	-0.4408	-0.5851	-0.4382	-0.3694	-0.3747	-0.5848	-0.3798	-0.4796	-0.4799	-0.4342	-0.7205	-0.2344	-0.5689	-0.3746	-0.4866
5981	RFC1	-0.5854	-0.5484	-0.7401	-0.4492	-0.3594	-0.6053	-0.4463	-0.7343	-0.5517	-0.4309	-0.5246	-0.6091	-0.4919	-0.4237	-0.4134	-0.3703	-0.431	-0.6104	-0.6035	-0.524	-0.3389	-0.4609	-0.369	-0.4594	-0.4485	-0.5164	-0.5495	-0.52	-0.6943	-0.1155	-0.7197	-0.4446	-0.5929	-0.6055	-0.4002	-0.3568	-0.2477	-0.5013	-0.3357	-0.4179	-0.4748	-0.3464	-0.3894	-0.5879	-0.2158	-0.2027	-0.6362	-0.6836
5982	RFC2	-1.4502	-1.4221	-0.8284	-1.1657	-1.065	-1.1265	-1.2826	-1.2954	-1.072	-0.9496	-1.165	-1.0113	-0.9379	-1.0269	-0.9979	-1.0865	-1.0434	-1.338	-0.9659	-1.2187	-1.0674	-1.1943	-1.3128	-0.9848	-1.2155	-1.0002	-1.0117	-1.1973	-0.9697	-0.9935	-0.9982	-1.0892	-1.2342	-1.1828	-1.0726	-1.077	-1.1686	-1.2032	-0.7446	-0.9452	-1.1269	-1.2018	-1.1967	-1.0041	-1.3943	-0.9723	-1.0667	-1.028
5983	RFC3	-1.1968	-1.1444	-1.0565	-0.7349	-1.0796	-1.0341	-1.3789	-1.0547	-1.2078	-1.0102	-1.1966	-1.2027	-1.0863	-1.1345	-1.2727	-1.1625	-1.233	-1.2556	-1.0728	-1.3001	-1.1495	-1.2055	-1.0654	-0.9886	-1.1931	-1.1796	-1.2653	-1.2022	-1.047	-1.0755	-1.1881	-1.1077	-1.1174	-1.092	-1.0299	-1.0401	-1.0705	-1.121	-0.9255	-1.0149	-0.964	-1.2551	-1.144	-1.0401	-1.3666	-1.1932	-1.174	-1.1649
5984	RFC4	-0.9318	-0.9925	-0.7112	-0.8658	-0.9437	-0.6842	-0.7258	-0.6716	-0.6759	-0.7392	-0.9958	-0.6665	-0.7643	-0.7937	-0.5158	-0.8379	-0.7427	-0.8393	-0.4594	-1.1425	-0.5655	-0.8522	-0.9043	-0.6688	-0.8932	-0.8285	-0.6618	-0.753	-0.6592	-0.6996	-0.9397	-0.7418	-1.0236	-0.5635	-0.727	-0.7739	-0.8046	-0.7509	-0.7345	-0.7719	-0.8297	-0.8049	-1.44	-0.6574	-0.9233	-0.5602	-0.6828	-0.5672
5985	RFC5	-0.9759	-1.3094	-0.5544	-0.7746	-0.8768	-0.8916	-0.8395	-0.872	-0.9192	-0.7356	-1.1409	-0.969	-0.7643	-0.7061	-0.94	-0.7974	-0.9252	-1.0222	-0.8157	-0.9697	-1.0291	-0.8522	-1.0628	-0.7988	-0.829	-0.756	-0.7728	-1.0585	-0.7863	-1.1075	-0.7149	-0.8805	-0.7573	-0.841	-0.761	-0.9938	-0.7414	-0.7326	-0.5764	-0.8126	-0.8154	-0.7489	-0.8836	-1.0487	-1.1284	-0.7999	-0.8748	-1.0064
80010	RMI1	-0.3272	-0.395	-0.4435	-0.6306	-0.4943	-0.5938	-0.6152	-0.6551	-0.5054	-0.3803	-0.3492	-0.6236	-0.612	-0.6544	-0.2235	-0.6711	-0.7484	-0.7655	-0.3908	-0.4442	-0.4721	-0.4502	-0.676	-0.3735	-0.584	-0.5589	-0.5455	-0.3849	-0.4345	-0.5184	-0.4294	-0.5967	-0.4539	-0.5082	-0.6394	-0.3567	-0.5527	-0.6233	-0.6723	-0.6574	-0.4956	-0.6135	-0.6737	-0.4765	-0.3378	-0.5899	-0.722	-0.5516
8731	RNMT	-1.0152	-0.7836	-0.5727	-0.7002	-0.6051	-0.873	-0.7494	-0.914	-1.0428	-0.5824	-0.7444	-0.6942	-0.727	-0.6214	-0.7337	-0.883	-0.5406	-0.7444	-0.5769	-0.8092	-0.7614	-0.791	-0.701	-0.6954	-0.5733	-0.649	-0.9284	-0.6189	-0.6304	-0.6944	-0.6749	-0.7378	-0.6106	-0.6035	-0.5986	-0.8148	-1.0221	-0.7262	-0.7244	-0.7764	-0.6955	-0.5932	-0.8789	-0.6828	-0.4878	-0.9198	-0.8261	-0.7909
6117	RPA1	-1.6001	-1.706	-1.6243	-1.432	-1.2717	-1.2952	-1.3108	-1.3487	-1.1246	-1.549	-1.2756	-1.4326	-1.431	-1.2347	-1.3841	-1.1565	-1.42	-1.7254	-1.0816	-1.6215	-1.6612	-1.4578	-1.4458	-1.4369	-1.6623	-1.5039	-1.5256	-1.2442	-1.1687	-1.3112	-1.3835	-1.0584	-1.4911	-1.124	-1.4205	-1.4111	-1.1623	-1.549	-1.2887	-1.3213	-1.2374	-1.7949	-1.424	-1.0821	-1.5931	-1.4756	-1.5491	-1.3619
6119	RPA3	-1.4172	-1.7446	-0.9788	-1.266	-1.0749	-1.0624	-1.0648	-0.8815	-0.9714	-1.0349	-0.897	-1.1364	-0.774	-0.994	-0.9498	-0.8734	-0.8461	-1.3905	-0.8855	-1.278	-0.8443	-0.9428	-1.3376	-1.2885	-1.3934	-0.9692	-0.8237	-1.2263	-1.0821	-0.7929	-1.0696	-0.9114	-1.0959	-0.9982	-0.9764	-0.91	-0.7319	-1.1356	-1.4355	-0.9846	-1.0832	-1.0761	-1.0801	-0.836	-1.2731	-0.9252	-0.9675	-0.9832
51750	RTEL1	-0.4924	-0.2405	-0.3894	-0.3306	-0.2499	-0.2001	-0.3012	-0.1271	-0.3076	-0.2401	-0.2771	-0.4254	-0.2463	-0.4113	-0.2548	-0.4047	-0.4037	-0.6639	-0.3099	-0.1902	-0.4015	-0.4553	-0.4689	-0.3538	-0.2822	-0.4217	-0.5013	-0.4966	-0.3836	-0.5828	-0.3181	-0.5417	-0.5782	-0.2665	-0.2555	-0.2813	-0.6196	-0.3837	-0.3624	-0.3958	-0.3565	-0.1533	-0.1677	-0.1008	-0.6006	-0.3198	-0.4526	-0.4789
23583	SMUG1	-0.4282	-0.348	-0.1427	-0.2784	-0.1334	-0.1554	-0.2831	-0.2611	-0.4485	-0.2676	-0.2645	-0.2522	-0.2707	-0.2033	-0.23	-0.3632	-0.2865	-0.4615	-0.3991	-0.5167	-0.1882	-0.1485	-0.3173	-0.3277	-0.2569	-0.2783	-0.4893	-0.3455	-0.3381	-0.2135	-0.3997	-0.176	-0.421	-0.3663	-0.3447	-0.2379	-0.1021	-0.3895	-0.4525	-0.2613	-0.3401	-0.4377	-0.3759	-0.2133	-0.2758	-0.3558	-0.2062	-0.2569
83932	SPRTN	-0.3715	-0.3525	-0.1793	-0.4479	-0.5055	-0.2701	-0.4001	-0.5488	-0.6445	-0.3881	-0.5434	-0.373	-0.3833	-0.5352	-0.3202	-0.3609	-0.4626	-0.713	-0.4499	-0.4828	-0.4241	-0.6069	-0.5988	-0.3676	-0.4292	-0.3874	-0.3916	-0.3083	-0.4413	-0.7773	-0.4712	-0.7464	-0.5461	-0.5116	-0.2727	-0.5097	-0.5636	-0.4249	-0.4552	-0.4121	-0.3222	-0.3636	-0.5152	-0.5134	-0.3457	-0.6165	-0.5888	-0.6522
7156	TOP3A	-0.5416	-0.6252	-0.6037	-0.6211	-0.6565	-0.51	-0.7642	-0.9595	-0.8801	-0.4932	-0.542	-0.806	-0.6883	-0.8794	-0.7156	-0.8298	-0.7806	-0.7571	-0.8644	-0.8681	-0.8338	-0.8165	-0.7834	-0.6462	-0.6435	-0.8707	-0.7738	-0.6192	-0.929	-0.7736	-0.461	-0.6247	-0.6834	-0.6434	-0.8137	-0.9612	-0.6734	-0.7879	-0.7281	-0.8022	-0.744	-0.7302	-0.626	-0.7721	-0.6423	-0.765	-0.7252	-0.626
11073	TOPBP1	-0.5229	-0.575	-0.9494	-0.878	-0.6568	-0.9705	-0.7388	-0.7439	-0.5337	-1.1109	-0.8169	-0.8233	-0.8977	-0.7098	-0.6708	-0.6296	-0.6689	-0.8222	-0.6424	-0.7309	-0.5251	-0.5722	-0.6893	-0.7461	-0.8042	-0.7242	-1.0463	-0.6686	-0.9264	-0.8017	-0.8475	-0.5986	-0.8959	-0.7874	-0.9504	-0.7089	-0.8338	-0.9503	-0.6756	-0.907	-0.8556	-0.6612	-0.5871	-0.7183	-0.7628	-0.8295	-0.42	-0.6609
29089	UBE2T	-0.3318	-0.2321	-0.1237	-0.0584	-0.1439	-0.3109	-0.0176	-0.0538	-0.204	-0.3582	-0.1811	-0.0547	-0.2603	-0.1871	-0.1867	-0.0797	-0.2353	-0.3047	-0.2047	-0.1798	-0.1671	-0.4751	-0.3057	-0.1923	-0.3256	-0.349	-0.1999	-0.2831	-0.3638	-0.1494	-0.3165	-0.2239	-0.1837	-0.3499	-0.2216	-0.1589	-0.0979	-0.3358	-0.2537	-0.2821	-0.3097	-0.2971	0.0184	-0.4649	-0.3884	-0.1063	-0.2678	-0.4309
7465	WEE1	-1.4724	-1.5254	-1.2948	-1.1743	-1.4223	-1.5411	-1.1117	-1.1575	-0.9714	-1.2865	-1.0588	-1.2554	-1.2812	-1.1965	-1.2638	-1.2848	-1.3737	-1.4624	-1.1265	-1.3646	-1.1045	-1.3732	-1.2073	-1.3948	-1.085	-1.263	-1.1788	-1.3946	-1.1342	-1.5273	-1.3447	-1.2171	-1.4414	-1.2909	-1.4572	-1.3058	-1.1888	-1.325	-1.5965	-1.2844	-1.451	-1.2889	-0.8395	-1.3793	-1.5847	-1.515	-1.3078	-1.2176
56949	XAB2	-1.3593	-1.1269	-1.3551	-1.4164	-1.4333	-1.309	-1.5785	-1.4639	-1.3216	-1.7791	-1.7624	-1.128	-1.2553	-1.4065	-1.4152	-1.4464	-1.5681	-1.342	-1.2216	-1.5523	-1.2171	-1.1891	-1.432	-1.2635	-1.4203	-1.2962	-1.299	-1.4909	-1.1875	-1.4013	-1.2568	-1.2451	-1.3467	-1.3873	-1.4581	-1.3495	-1.3066	-1.7062	-1.7914	-1.2572	-1.4054	-1.2313	-1.4221	-1.3118	-1.1448	-1.3487	-1.4095	-1.2824
7515	XRCC1	-0.3871	-0.3554	-0.3211	-0.2186	-0.375	-0.3473	-0.3216	-0.0803	-0.461	-0.2288	-0.2385	-0.2291	-0.416	-0.3535	-0.3187	-0.3708	-0.2705	-0.3576	-0.3111	-0.4155	-0.2079	-0.1782	-0.286	-0.2625	-0.3842	-0.1309	-0.327	-0.5763	-0.225	-0.3618	-0.5158	-0.4901	-0.282	-0.2153	-0.3054	-0.3803	-0.097	-0.3783	-0.2674	-0.3384	-0.2126	-0.2439	-0.2948	-0.3957	-0.4501	-0.377	-0.5526	-0.3464
7520	XRCC5	-0.7216	-0.8981	-0.733	-0.6094	-0.8028	-0.7814	-0.8071	-0.9814	-0.9737	-0.9001	-0.6847	-0.9757	-0.8375	-0.764	-0.9095	-0.6837	-0.9533	-1.0422	-0.7042	-1.0731	-0.8193	-0.9971	-1.0223	-0.8538	-0.8372	-0.5791	-0.835	-0.7108	-0.6507	-0.7984	-1.0238	-0.9239	-1.2466	-0.5074	-0.8449	-0.6724	-0.6886	-0.7908	-0.7001	-0.9525	-0.9321	-0.5795	-0.7269	-0.7404	-1.0155	-0.7936	-0.8417	-0.8212
2547	XRCC6	-1.4228	-1.4495	-1.2744	-1.2379	-1.3034	-1.2467	-1.3073	-1.0959	-1.3142	-1.2918	-1.2173	-1.397	-1.3533	-1.052	-1.2417	-1.2607	-1.3063	-1.4435	-0.9466	-1.4494	-1.4693	-1.3782	-1.29	-1.078	-1.4038	-1.0286	-1.3812	-1.0903	-1.1364	-1.0466	-1.292	-1.1061	-1.3759	-1.1914	-1.3064	-1.3148	-1.1817	-1.3243	-1.3496	-1.3754	-1.2328	-1.0276	-1.1643	-1.208	-1.3138	-1.1682	-1.1743	-1.3112
[truncated: 375 more columns]

## Sheet: Lineage
EntrezID	GeneSymbol	n_dependent_lineage	Bone	Breast	CNS	Colorectal	Esophagus	Gastric	Kidney	Leukemia	Liver	Lung	Multiple myeloma	Ovary	Pancreas	Skin	Upper aerodigestive	Urinary tract	Uterus
84126	ATRIP	11	1	0	1	0	0	0	1	0	1	1	0	1	1	1	1	1	1
902	CCNH	17	1	1	1	1	1	1	1	1	1	1	1	1	1	1	1	1	1
988	CDC5L	17	1	1	1	1	1	1	1	1	1	1	1	1	1	1	1	1	1
1022	CDK7	17	1	1	1	1	1	1	1	1	1	1	1	1	1	1	1	1	1
10036	CHAF1A	17	1	1	1	1	1	1	1	1	1	1	1	1	1	1	1	1	1
1111	CHEK1	17	1	1	1	1	1	1	1	1	1	1	1	1	1	1	1	1	1
1642	DDB1	17	1	1	1	1	1	1	1	1	1	1	1	1	1	1	1	1	1
1854	DUT	17	1	1	1	1	1	1	1	1	1	1	1	1	1	1	1	1	1
2068	ERCC2	17	1	1	1	1	1	1	1	1	1	1	1	1	1	1	1	1	1
2965	GTF2H1	10	1	0	1	0	0	0	0	1	1	1	1	1	1	1	1	0	0
2967	GTF2H3	1	0	0	0	0	0	0	0	1	0	0	0	0	0	0	0	0	0
2968	GTF2H4	17	1	1	1	1	1	1	1	1	1	1	1	1	1	1	1	1	1
10524	KAT5	15	1	1	1	1	1	0	0	1	1	1	1	1	1	1	1	1	1
4331	MNAT1	17	1	1	1	1	1	1	1	1	1	1	1	1	1	1	1	1	1
56160	NSMCE3	17	1	1	1	1	1	1	1	1	1	1	1	1	1	1	1	1	1
5111	PCNA	17	1	1	1	1	1	1	1	1	1	1	1	1	1	1	1	1	1
5356	PLRG1	17	1	1	1	1	1	1	1	1	1	1	1	1	1	1	1	1	1
11284	PNKP	11	1	0	1	0	0	0	1	0	1	1	0	1	1	1	1	1	1
5424	POLD1	17	1	1	1	1	1	1	1	1	1	1	1	1	1	1	1	1	1
5425	POLD2	16	1	1	1	1	1	1	0	1	1	1	1	1	1	1	1	1	1
10714	POLD3	17	1	1	1	1	1	1	1	1	1	1	1	1	1	1	1	1	1
5426	POLE	17	1	1	1	1	1	1	1	1	1	1	1	1	1	1	1	1	1
5427	POLE2	17	1	1	1	1	1	1	1	1	1	1	1	1	1	1	1	1	1
5531	PPP4C	17	1	1	1	1	1	1	1	1	1	1	1	1	1	1	1	1	1
27339	PRPF19	17	1	1	1	1	1	1	1	1	1	1	1	1	1	1	1	1	1
5892	RAD51D	16	1	1	1	1	1	0	1	1	1	1	1	1	1	1	1	1	1
5980	REV3L	5	1	1	1	0	0	0	0	0	0	1	0	0	0	0	0	0	1
5981	RFC1	5	0	1	1	0	0	0	0	0	0	1	0	1	0	0	0	1	0
5982	RFC2	17	1	1	1	1	1	1	1	1	1	1	1	1	1	1	1	1	1
5983	RFC3	17	1	1	1	1	1	1	1	1	1	1	1	1	1	1	1	1	1
5984	RFC4	17	1	1	1	1	1	1	1	1	1	1	1	1	1	1	1	1	1
5985	RFC5	17	1	1	1	1	1	1	1	1	1	1	1	1	1	1	1	1	1
80010	RMI1	9	1	1	1	0	0	0	0	0	0	1	0	1	1	1	1	1	0
8731	RNMT	17	1	1	1	1	1	1	1	1	1	1	1	1	1	1	1	1	1
6117	RPA1	17	1	1	1	1	1	1	1	1	1	1	1	1	1	1	1	1	1
6119	RPA3	17	1	1	1	1	1	1	1	1	1	1	1	1	1	1	1	1	1
83932	SPRTN	3	1	0	0	0	0	0	0	0	0	1	0	0	0	0	1	0	0
7156	TOP3A	17	1	1	1	1	1	1	1	1	1	1	1	1	1	1	1	1	1
11073	TOPBP1	17	1	1	1	1	1	1	1	1	1	1	1	1	1	1	1	1	1
7465	WEE1	17	1	1	1	1	1	1	1	1	1	1	1	1	1	1	1	1	1
56949	XAB2	17	1	1	1	1	1	1	1	1	1	1	1	1	1	1	1	1	1
7520	XRCC5	17	1	1	1	1	1	1	1	1	1	1	1	1	1	1	1	1	1
2547	XRCC6	17	1	1	1	1	1	1	1	1	1	1	1	1	1	1	1	1	1
