# Supplementary material for: Pan-cancer analysis of non-oncogene addiction to DNA repair
Source: Research Square preprint supplement (doi:10.21203/rs.3.rs-846744/v1), 2021-09-03
Supplement: Supplementary file 12 [file d837ebe2fabaf17153e25135.xlsx]

## Sheet: Supp Table 6
Worse survival signature (correlated genes)			Better survival signature (correlated genes)
Gene Symbol	Gene ID	PCC	Gene Symbol	Gene ID	PCC
RACGAP1	ENSG00000161800.12	0.84	UBTF	ENSG00000108312.14	0.8
MCM6	ENSG00000076003.4	0.84	TARDBP	ENSG00000120948.15	0.79
BUB1B	ENSG00000156970.12	0.84	KHDRBS1	ENSG00000121774.17	0.77
SPC25	ENSG00000152253.8	0.84	YLPM1	ENSG00000119596.17	0.76
KIF4A	ENSG00000090889.11	0.83	HNRNPK	ENSG00000165119.18	0.76
NUSAP1	ENSG00000137804.12	0.83	HNRNPR	ENSG00000125944.18	0.76
KIF11	ENSG00000138160.5	0.83	DHX9	ENSG00000135829.16	0.76
BUB1	ENSG00000169679.14	0.83	THRAP3	ENSG00000054118.13	0.75
NCAPH	ENSG00000121152.9	0.83	SART3	ENSG00000075856.11	0.75
CENPO	ENSG00000138092.10	0.83	MATR3	ENSG00000015479.17	0.74
CHEK1	ENSG00000149554.12	0.83	SAFB	ENSG00000160633.12	0.74
GINS1	ENSG00000101003.9	0.83	HNRNPU	ENSG00000153187.16	0.74
TIMELESS	ENSG00000111602.11	0.82	TP53BP1	ENSG00000067369.13	0.74
KIF23	ENSG00000137807.13	0.82	ELAVL1	ENSG00000066044.13	0.73
NCAPG	ENSG00000109805.9	0.82	RSRC2	ENSG00000111011.17	0.73
FANCI	ENSG00000140525.17	0.82	YTHDC1	ENSG00000083896.12	0.73
LMNB1	ENSG00000113368.11	0.82	NRF1	ENSG00000106459.14	0.73
PCNA	ENSG00000132646.10	0.81	RBMX	ENSG00000147274.14	0.73
CCNB2	ENSG00000157456.7	0.81	FUBP1	ENSG00000162613.16	0.72
HJURP	ENSG00000123485.11	0.81	DPF2	ENSG00000133884.9	0.72
SGOL2	ENSG00000163535.17	0.81	HNRNPDL	ENSG00000152795.17	0.71
NCAPG2	ENSG00000146918.19	0.81	HNRNPA0	ENSG00000177733.6	0.71
ORC1	ENSG00000085840.12	0.81	HNRNPM	ENSG00000099783.11	0.71
PLK4	ENSG00000142731.10	0.81	BRD2	ENSG00000204256.12	0.71
TPX2	ENSG00000088325.15	0.81	SCAF8	ENSG00000213079.9	0.71
ZWILCH	ENSG00000174442.11	0.81	MFAP1	ENSG00000140259.6	0.71
CENPI	ENSG00000102384.13	0.81	ERCC3	ENSG00000163161.12	0.7
RFC5	ENSG00000111445.13	0.8	CTCF	ENSG00000102974.14	0.7
TMPO	ENSG00000120802.13	0.8	SRSF1	ENSG00000136450.12	0.7
PARPBP	ENSG00000185480.11	0.8	C7orf55-LUC7L2	ENSG00000146963.17	0.7
OIP5	ENSG00000104147.8	0.8	HNRNPA2B1	ENSG00000122566.20	0.7
RAD51	ENSG00000051180.16	0.8	ILF3	ENSG00000129351.17	0.69
CDCA5	ENSG00000146670.9	0.8	KDM3B	ENSG00000120733.13	0.69
KIF2C	ENSG00000142945.12	0.8	CPSF7	ENSG00000149532.15	0.69
GTSE1	ENSG00000075218.18	0.8	RANBP3	ENSG00000031823.14	0.69
CENPK	ENSG00000123219.12	0.8	FAM193A	ENSG00000125386.14	0.69
DLGAP5	ENSG00000126787.12	0.8	CCDC97	ENSG00000142039.3	0.69
CDK1	ENSG00000170312.15	0.8	NCOA5	ENSG00000124160.11	0.69
ZWINT	ENSG00000122952.16	0.79	KDM4A	ENSG00000066135.12	0.69
UHRF1	ENSG00000276043.4	0.79	CPSF6	ENSG00000111605.16	0.69
FEN1	ENSG00000168496.3	0.79	PHF2	ENSG00000197724.10	0.69
UBE2T	ENSG00000077152.9	0.79	ZNF740	ENSG00000139651.10	0.69
WDHD1	ENSG00000198554.11	0.79	ZMYM3	ENSG00000147130.14	0.68
PRC1	ENSG00000198901.13	0.79	PDCD7	ENSG00000090470.14	0.68
MAD2L1	ENSG00000164109.13	0.79	SFPQ	ENSG00000116560.10	0.68
KIFC1	ENSG00000237649.7	0.79	EP400	ENSG00000183495.13	0.68
EXO1	ENSG00000174371.16	0.79	XRCC1	ENSG00000073050.11	0.68
XRCC2	ENSG00000196584.2	0.79	WDR82	ENSG00000164091.11	0.68
SRSF7	ENSG00000115875.18	0.79	ARID1A	ENSG00000117713.17	0.68
PRIM1	ENSG00000198056.13	0.79	STRIP1	ENSG00000143093.14	0.68
TTK	ENSG00000112742.9	0.79	EPC2	ENSG00000135999.11	0.68
ASF1B	ENSG00000105011.8	0.79	ZMYM4	ENSG00000146463.11	0.68
SRSF2	ENSG00000161547.14	0.79	HNRNPL	ENSG00000104824.16	0.68
BRCA1	ENSG00000012048.19	0.79	LRRC47	ENSG00000130764.9	0.68
EZH2	ENSG00000106462.10	0.79	PUM2	ENSG00000055917.15	0.68
CKAP2L	ENSG00000169607.12	0.79	ZBTB49	ENSG00000168826.15	0.68
FBXO5	ENSG00000112029.9	0.78	FUBP3	ENSG00000107164.15	0.68
CCNA2	ENSG00000145386.9	0.78	IWS1	ENSG00000163166.13	0.68
PLK1	ENSG00000166851.14	0.78	RBM15B	ENSG00000259956.1	0.68
KIF18A	ENSG00000121621.6	0.78	SMARCA5	ENSG00000153147.5	0.68
KIF15	ENSG00000163808.16	0.78	ZC3H4	ENSG00000130749.9	0.68
ORC6	ENSG00000091651.8	0.78	RABGAP1	ENSG00000011454.16	0.68
KIAA1524	ENSG00000163507.13	0.78	SRSF10	ENSG00000188529.14	0.68
RQCD1	ENSG00000144580.13	0.78	POLDIP3	ENSG00000100227.17	0.68
SKA1	ENSG00000154839.9	0.78	HNRNPD	ENSG00000138668.18	0.68
CENPA	ENSG00000115163.14	0.78	VWA9	ENSG00000138614.14	0.67
CCNB1	ENSG00000134057.14	0.78	DNAJC14	ENSG00000135392.15	0.67
KIF18B	ENSG00000186185.13	0.78	FBXO11	ENSG00000138081.19	0.67
CENPL	ENSG00000120334.15	0.78	WDR92	ENSG00000243667.6	0.67
ATAD5	ENSG00000176208.8	0.78	EDC3	ENSG00000179151.11	0.67
SRSF3	ENSG00000112081.16	0.77	SF1	ENSG00000168066.20	0.67
MCM2	ENSG00000073111.13	0.77	SUDS3	ENSG00000111707.11	0.67
SGOL1	ENSG00000129810.14	0.77	TAF1	ENSG00000147133.15	0.67
CDK2	ENSG00000123374.10	0.77	SETD2	ENSG00000181555.19	0.67
INCENP	ENSG00000149503.12	0.77	TFCP2	ENSG00000135457.9	0.67
CDC7	ENSG00000097046.12	0.77	PPP1R8	ENSG00000117751.17	0.67
KIF14	ENSG00000118193.11	0.77	HNRNPUL1	ENSG00000105323.16	0.67
CENPH	ENSG00000153044.9	0.77	HNRNPH3	ENSG00000096746.17	0.67
CLSPN	ENSG00000092853.13	0.77	ADNP	ENSG00000101126.15	0.67
ERCC6L	ENSG00000186871.6	0.77	SNRNP200	ENSG00000144028.14	0.67
POLA2	ENSG00000014138.8	0.77	ZNF2	ENSG00000275111.4	0.67
CCNF	ENSG00000162063.12	0.77	SMARCAL1	ENSG00000138375.12	0.66
DTL	ENSG00000143476.17	0.77	SNW1	ENSG00000100603.13	0.66
DNA2	ENSG00000138346.14	0.77	ELF2	ENSG00000109381.19	0.66
TRA2B	ENSG00000136527.17	0.76	HNRNPLL	ENSG00000143889.15	0.66
SASS6	ENSG00000156876.9	0.76	DDX50	ENSG00000107625.12	0.66
NEK2	ENSG00000117650.12	0.76	SENP6	ENSG00000112701.17	0.66
MELK	ENSG00000165304.7	0.76	SMARCC2	ENSG00000139613.11	0.66
MCM8	ENSG00000125885.13	0.76	HNRNPUL2	ENSG00000214753.2	0.66
KIF20A	ENSG00000112984.11	0.76	SRSF3	ENSG00000112081.16	0.66
CDC25C	ENSG00000158402.18	0.76	PRDM2	ENSG00000116731.22	0.66
CEP78	ENSG00000148019.12	0.76	BCLAF1	ENSG00000029363.15	0.66
ASPM	ENSG00000066279.16	0.76	LDB1	ENSG00000198728.10	0.66
ECT2	ENSG00000114346.13	0.76	EWSR1	ENSG00000182944.17	0.66
RFC2	ENSG00000049541.10	0.76	ARID1B	ENSG00000049618.21	0.66
RRM1	ENSG00000167325.14	0.76	GPBP1	ENSG00000062194.15	0.66
RFWD3	ENSG00000168411.13	0.76	USP48	ENSG00000090686.15	0.66
WDR76	ENSG00000092470.11	0.76	RNF20	ENSG00000155827.11	0.66
SPDL1	ENSG00000040275.16	0.76	ZNF197	ENSG00000186448.14	0.66
MCM10	ENSG00000065328.16	0.76	QRICH1	ENSG00000198218.10	0.65
PCC	Pearson's Correlation Coeficient
